# Supplementary material for: Ruthenium-catalyzed reductive amination of ketones with nitroarenes and nitriles
Source: Royal Society of Chemistry journal article supplement (doi:10.1039/d2ob02312a), 2023-01-01
Supplement: d2ob02312a1.pdf [file d2ob02312a1.pdf]

## Supporting Information

### **Ruthenium-Catalyzed Reductive Amination of Ketones with Nitroarenes and Nitriles**

Rui Sun,<sup>a,b</sup> Shuang-Shuang Ma,<sup>a,b</sup> Zi-Heng Zhang,<sup>c,d</sup> Yan-Qiang Zhang<sup>a,b\*</sup> and Bao-Hua Xu<sup>a,b,d\*</sup>

<sup>a</sup> *Beijing Key Laboratory of Ionic Liquids Clean Process, CAS Key Laboratory of Green Process and Engineering, State Key Laboratory of Multiphase Complex Systems, State Key Laboratory of Biochemical Engineering, Institution of Process Engineering, Chinese Academy of Sciences, Beijing 100190, China*

<sup>b</sup> *College of Chemistry and Chemical Engineering, University of Chinese Academy of Sciences, Beijing 100049, China*

<sup>c</sup> *College of Materials Science & Engineering, Huaqiao University, Xiamen 361021, China.*

<sup>d</sup> *Beijing Key Laboratory for Chemical Power Source and Green Catalysis, School of Chemistry and Chemical Engineering, Beijing Institute of Technology, Beijing, 100081, China*

*\* Corresponding Authors:*

*Yan-Qiang Zhang, Email: yqzhang@ipe.ac.cn*

*Bao-Hua Xu, Email: bhxu@bit.edu.cn*

## Table of Content

|                                                            |    |
|------------------------------------------------------------|----|
| 1. General Experimental Information .....                  | 3  |
| 2. Preparation and characterization of Ru(dppbsa) .....    | 4  |
| 3. Ruthenium-catalyzed Reductive Amination Reactions ..... | 8  |
| 4. Amalgamation experiments.....                           | 11 |
| 5. Detection of <i>p</i> -cymene .....                     | 11 |
| 6. NMR, GC and GC-MS Data .....                            | 12 |
| 7. References .....                                        | 26 |
| 8. NMR Spectra .....                                       | 27 |

## 1. General Experimental Information

Unless specified, all substrates, Ru precursor was obtained commercially and their purity has been checked before use. All reactions were done under argon using a standard glove box and the solvents were dried before use unless otherwise noted. In particular, the Schlenk techniques were used in the synthesis of the Ru catalyst. All catalytic reactions were carried out in 25 mL autoclaves (Wuzhou Dingchuang (Beijing) Technology Co., Ltd.). GC-7890B equipped with a capillary column (DB-FFAP, 30 m × 0.32 mm) using a flame ionization detector. GC-MS was performed using Shimadzu GCMS-QP2020, column Rtx-5MS 30 m × 0.25 mm × 0.25 μm. GC was recorded on an Agilent 8890N instrument.  $^1\text{H}$ ,  $^{13}\text{C}$ ,  $^{31}\text{P}$  NMR data were recorded on a Bruker ASCEND spectrometer ( $^1\text{H}$ , 600 MHz;  $^{13}\text{C}\{^1\text{H}\}$ , 151 MHz) using  $\text{CDCl}_3$  as solvents.  $^1\text{H}$  NMR and  $^{13}\text{C}$  NMR, chemical shift  $\delta$  is given relative to TMS and referenced to the solvent signal. Chemical shifts were reported in ppm with the internal TMS signal at 0.0 ppm as a standard. The spectra are interpreted as: s = singlet, d = doublet, t = triplet, m = multiplet, dd = doublet of doublets, dt = doublet of triplets, ddd = doublet of doublet of doublets, coupling constant ( $s$ )  $J$  are reported in Hz and relative integrations are reported. Column chromatography was performed using silica gel.

## 2. Preparation and characterization of Ru(dppbsa)

### Preparation of dppbsa Ligand

According to the literature,<sup>51</sup> benzenesulfonic acid (0.80 g, 5 mmol) was dissolved in a Schleck tube with 25 mL of THF, *n*-BuLi (2.5 M in hexanes; 4 mL, 10 mmol) was added at 0 °C. After stirring for 1 h at room temperature; the solution was cooled to 0 °C again, a solution of chlorodi-phenylphosphane (1.10 g, 5 mmol) in THF (10 mL) was added dropwise to the Schleck tube and stirred at room temperature overnight. After the reaction, the solvent was removed in vacuo to obtain a pale-yellow solid. The solid was dissolved in dichloromethane (50 mL) and extracted with aqueous HCl (2 M, 30 mL), and then deionized water (30 mL) was added twice. The crude product was dissolved in dichloromethane and recrystallized with ether at -32 °C to obtain 1.05 g of white solid with a yield of 62%. <sup>1</sup>H NMR (600 MHz, 298K, CDCl<sub>3</sub>): δ = 8.39 (m, 1H), 7.80 (m, 1H), 7.73 (m, 2H), 7.66 (m, 2H), 7.64 (m, 2H), 7.59 (m, 4H), 7.49 (m, 1H), 7.25 (m, 1H), N.O. (-SO<sub>3</sub>H). <sup>13</sup>C{<sup>1</sup>H} NMR (151 MHz, 298K, CDCl<sub>3</sub>): δ = 152.9 (*J*<sub>PC</sub> = 8.9 Hz, *i*-Ph-SO<sub>3</sub>H), 135.5 (*J*<sub>PC</sub> = 3.2 Hz, *i*-Ph), 134.6 (*J*<sub>PC</sub> = 3.0 Hz, 2 × *i*-Ph), 134.5, 134.4, 134.0, 133.9, 130.2, 130.1 (4), 130.1 (1), 130.0 (5), 129.4 (2), 129.3 (6), 119.1, 118.5, 113.7, 113.1 (Ph). <sup>31</sup>P{<sup>1</sup>H} NMR (243 MHz, 298K, CDCl<sub>3</sub>): δ = 3.8.

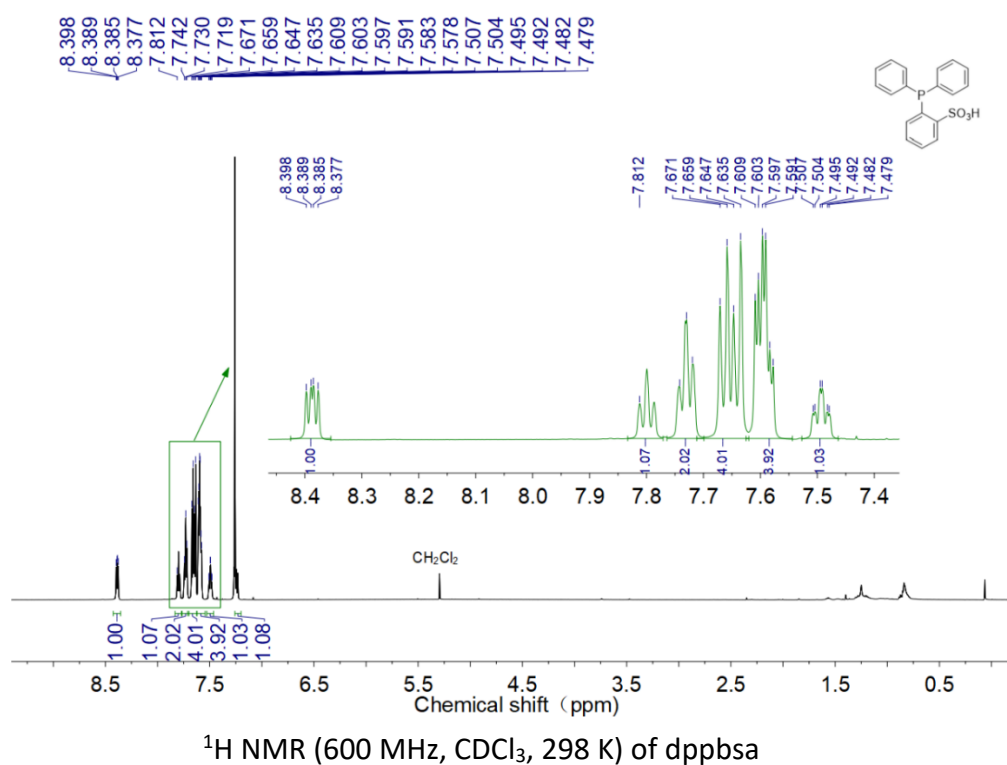

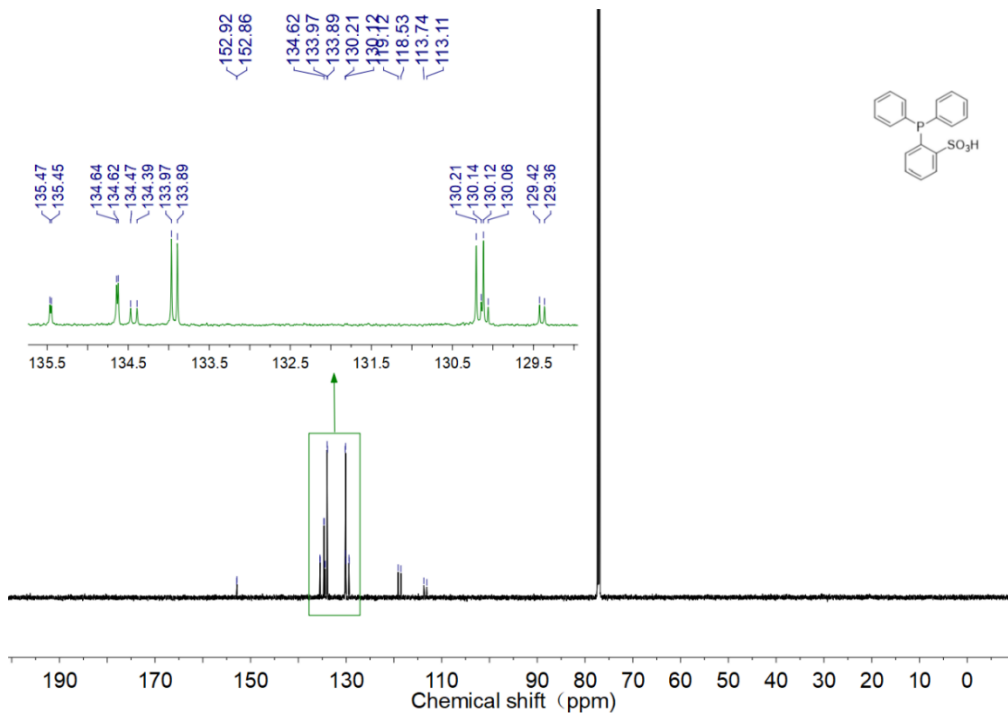

<sup>13</sup>C NMR (151 MHz, CDCl<sub>3</sub>, 298 K) of dppbsa

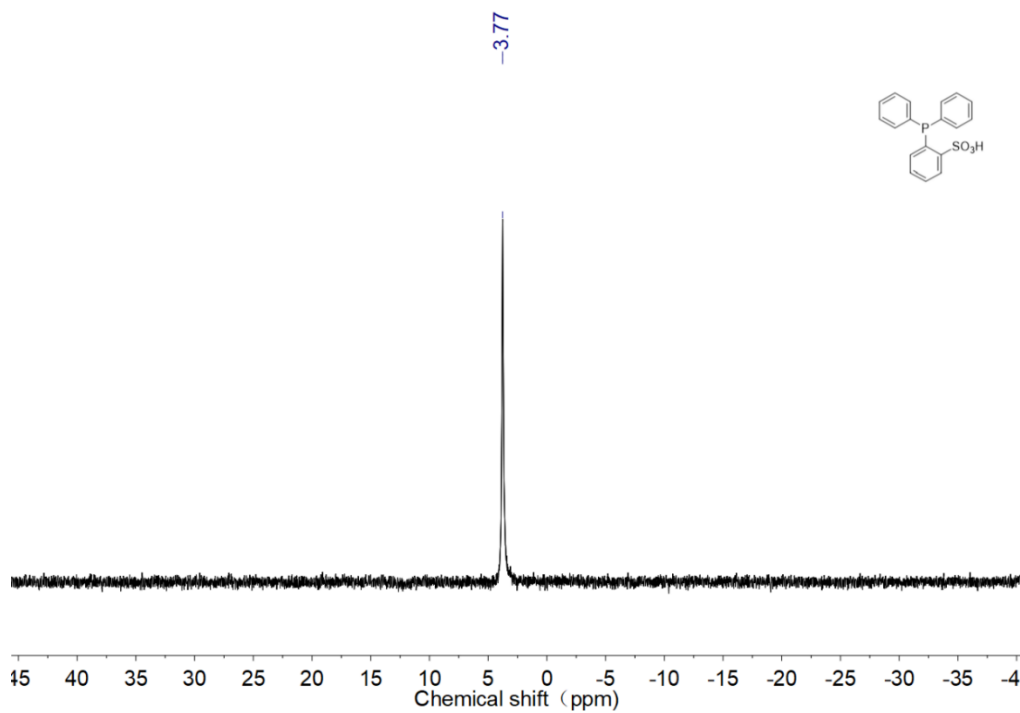

<sup>31</sup>P NMR (243 MHz, CDCl<sub>3</sub>, 298 K) of dppbsa

### Preparation of Ru(dppbsa) Complex

According to the literature,<sup>S2</sup> dppbsa ligand (164.2 mg, 0.46 mmol) and *t*-BuOK (58.2 mg, 0.51 mmol, 1.1 equiv.) were added to a 25 mL Schlenk tube, 10 mL of degassed MeOH was added, and the mixture was stirred at room temperature for 30 min; [Ru(*p*-cymene)Cl<sub>2</sub>]<sub>2</sub> (144.5 mg, 0.22 mmol, 0.5 equiv.) was added and stirred at room temperature for 16 h; after the MeOH was removed in vacuo, the solid was dissolved in dichloromethane. Filter and recrystallize in *n*-hexane/dichloromethane solution to obtain 262.2 mg of dark red solid, with a yield of 90%. <sup>1</sup>H NMR (600 MHz, 298 K, CDCl<sub>3</sub>): δ = 8.08 (m, 1H), 7.92 (m, 2H), 7.64 (m, 1H), 7.62 (m, 1H), 7.54 (m, 1H), 7.50 (m, 1H), 7.46 (m, 4H), 7.44 (m, 1H), 7.25 (m, 1H), 6.96 (m, 1H), 5.83 (d, <sup>3</sup>J<sub>HH</sub> = 6.5 Hz, 1H), 5.78 (d, <sup>3</sup>J<sub>HH</sub> = 6.5 Hz, 1H), 5.54 (d, <sup>3</sup>J<sub>HH</sub> = 5.5 Hz, 1H), 5.44 (d, <sup>3</sup>J<sub>HH</sub> = 5.5 Hz, 1H), 2.62 (sept, <sup>3</sup>J<sub>HH</sub> = 6.8 Hz, <sup>3</sup>J<sub>HH</sub> = 6.8 Hz, 1H), 1.89 (s, 3H, CH<sub>3</sub>), 1.15 (d, <sup>3</sup>J<sub>HH</sub> = 6.8 Hz, 3H), 0.94 (d, <sup>3</sup>J<sub>HH</sub> = 6.8 Hz, 3H). <sup>13</sup>C{<sup>1</sup>H} NMR (151 MHz, 298K, CDCl<sub>3</sub>): δ = 147.2 (*J*<sub>PC</sub> = 12.8 Hz, *i*-Ph-SO<sub>3</sub>Ru), 136.1 (*J*<sub>PC</sub> = 9.8 Hz), 134.1 (*J*<sub>PC</sub> = 9.8 Hz), 133.3, 133.0(0), 132.9(6), 131.8 (*J*<sub>PC</sub> = 2.5 Hz), 131.5, 131.3 (*J*<sub>PC</sub> = 2.0 Hz), 131.2, 131.0 (*J*<sub>PC</sub> = 2.5 Hz), 129.9 (*J*<sub>PC</sub> = 6.8 Hz), 128.7 (*J*<sub>PC</sub> = 8.3 Hz), 128.5 (*J*<sub>PC</sub> = 9.7 Hz), 128.4 (*J*<sub>PC</sub> = 10.3 Hz), 128.2, 128.1, 108.0, 94.4, 92.9 (*J*<sub>PC</sub> = 5.3 Hz), 87.3 (*J*<sub>PC</sub> = 7.7 Hz), 85.6 (*J*<sub>PC</sub> = 2.2 Hz), 83.9 (*J*<sub>PC</sub> = 2.2 Hz), 30.2, 22.9, 20.5, 17.8. <sup>31</sup>P{<sup>1</sup>H} NMR (243 MHz, 298K, CDCl<sub>3</sub>): δ = 22.9.

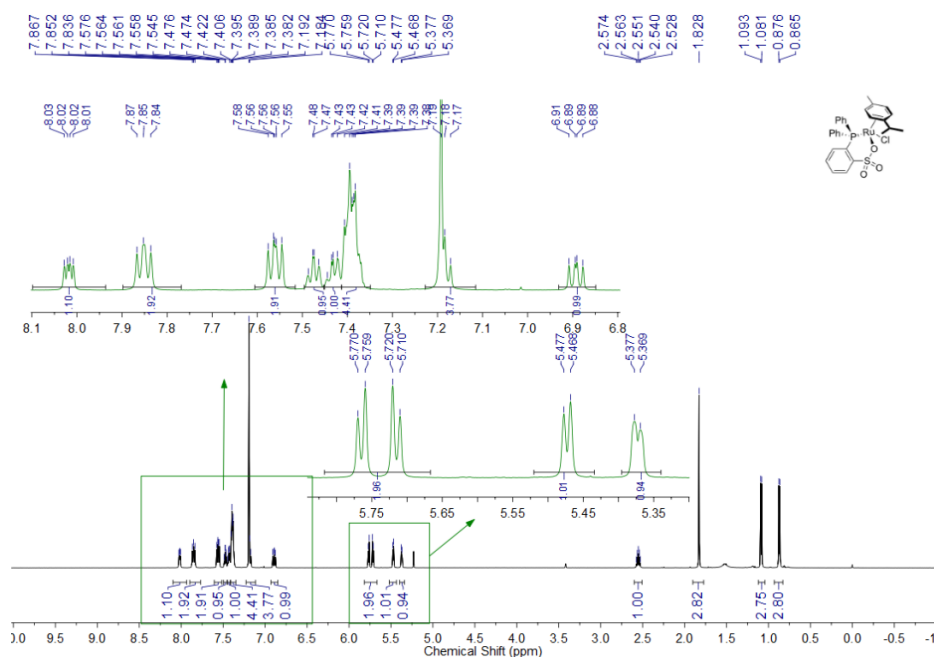

<sup>1</sup>H NMR (600 MHz, CDCl<sub>3</sub>, 298 K) of Ru(dppbsa)

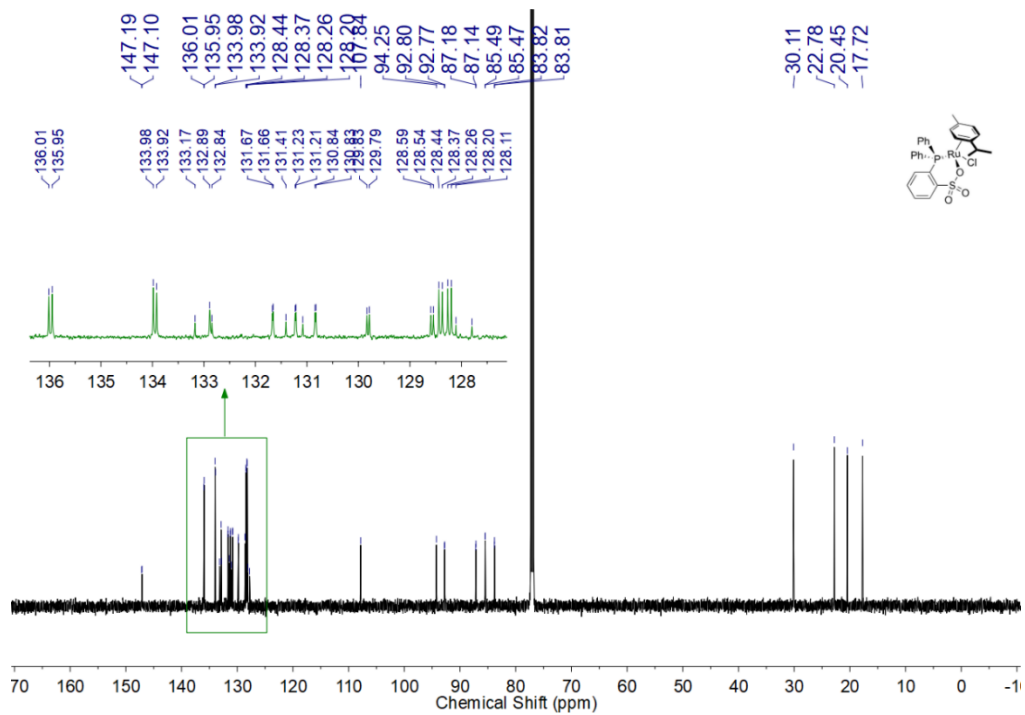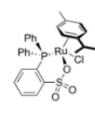

$^{13}\text{C}$  NMR (151 MHz,  $\text{CDCl}_3$ , 298 K) of Ru(dppbsa)

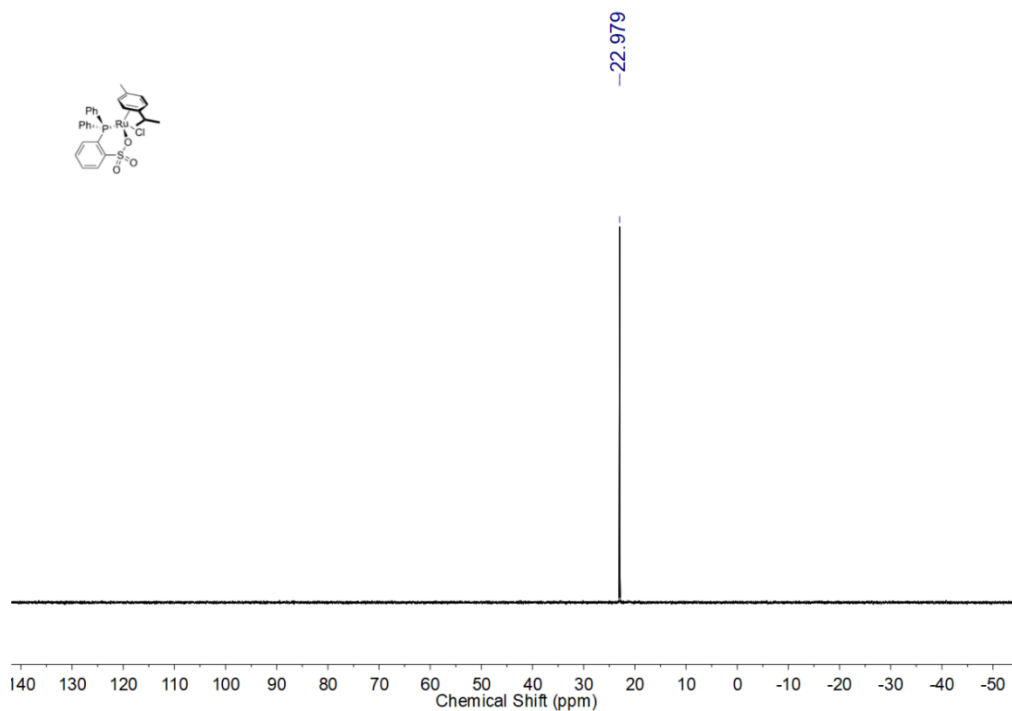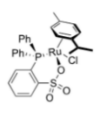

$^{31}\text{P}$  NMR (243 MHz,  $\text{CDCl}_3$ , 298 K) of Ru(dppbsa)

### 3. Ruthenium-catalyzed Reductive Amination Reactions

**General Procedure:** In a typical experiment, combination of substrate, Ru(dppbsa) (3.7 mg, 6  $\mu$ mol) and *p*-TsOH (6.8 mg, 40  $\mu$ mol) was dissolved in toluene (2 mL) in a reaction vessel equipped with a Teflon lining and a stir bar in the glove box. After addition of the above reactants, the reaction vessel was filled with H<sub>2</sub>. The solution was stirred at 120 °C. At the end of the reaction, the pressure of reaction vessel was gradually released, and the reaction mixture was diluted with ethyl acetate (20 mL) for analysis. The structures of the products were determined by GC-MS analysis, and yields determined by GC analysis. For some selected examples, the solvent was removed under vacuum to provide a crude product for <sup>1</sup>H NMR (600 MHz, 298 K, CDCl<sub>3</sub>) analysis. The structures of the products were determined by <sup>1</sup>H NMR and <sup>13</sup>C NMR, with spectra matching those reported in the literature or authentic samples<sup>S3,4</sup>.



**Screening Conditions for Catalytic Reductive Amination of Acetophenone (2a) with nitrobenzene (1a).**

**Table 1.** Reductive amination of acetophenone (**2a**) with nitrobenzene (**1a**).<sup>a</sup>

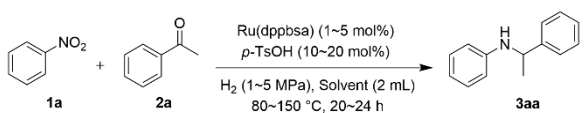

| Entry             | <b>2a</b><br>(equiv.) | [Ru]<br>(mol%) | T<br>(°C) | Solvent        | Conv.<br>(%) | Yield<br>(%) |
|-------------------|-----------------------|----------------|-----------|----------------|--------------|--------------|
| 1                 | 2                     | 5              | 150       | Toluene        | 98           | 40           |
| 2                 | 5                     | 5              | 150       | Toluene        | 100          | 55           |
| 3                 | 10                    | 5              | 150       | Toluene        | 99           | 60           |
| 4                 | 20                    | 5              | 150       | Toluene        | 100          | 78           |
| 5                 | 25                    | 5              | 150       | Toluene        | 100          | 69           |
| 6                 | 30                    | 5              | 150       | Toluene        | 100          | 66           |
| 7 <sup>b</sup>    | 20                    | 5              | 150       | Toluene        | 100          | 67           |
| 8 <sup>c,d</sup>  | 20                    | 5              | 120       | toluene        | 100          | 50           |
| 9                 | 20                    | 5              | 120       | Toluene        | 100          | 76           |
| 10                | 20                    | 5              | 80        | Toluene        | 100          | 40           |
| 11                | 20                    | 5              | 120       | THF            | 100          | 63           |
| 12                | 20                    | 5              | 120       | Heptane        | 100          | 50           |
| 13                | 20                    | 5              | 120       | <i>t</i> -BuOH | 100          | 48           |
| 14                | 20                    | 5              | 120       | Anisole        | 100          | 36           |
| 15                | 20                    | 3              | 120       | Toluene        | 100          | 81           |
| 16                | 20                    | 1              | 120       | Toluene        | 100          | 9            |
| 17 <sup>c</sup>   | 20                    | 3              | 120       | Toluene        | 100          | 91           |
| 18 <sup>c,d</sup> | 20                    | 3              | 120       | Toluene        | 100          | 62           |

<sup>a</sup> **General conditions:** **1a** (0.2 mmol), H<sub>2</sub> (1 MPa), *p*-TsOH (10 mol%), 24 h, under argon, in autoclave; yields were determined by GC where biphenyl is severed as the internal standard; <sup>b</sup> H<sub>2</sub> (3 MPa), 2-phenylethanol (**6a**) was detected with 55% GC yield; <sup>c</sup> H<sub>2</sub> (5 MPa), **6a** was detected with 58% GC yield; <sup>d</sup> *p*-TsOH (20 mol%); <sup>e</sup> 20 h. THF: tetrahydrofuran.

**Screening Conditions for Catalytic Reductive Amination of Acetophenone (2a) with benzonitrile (4a).**

**Table S2.** Reductive amination of acetophenone (**2a**) with benzonitrile (**4a**).<sup>a</sup>

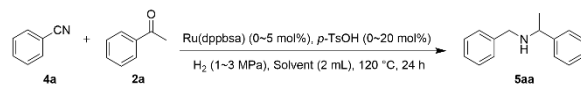

| Entry | [Ru]<br>(mol%) | H <sub>2</sub><br>(MPa) | Time<br>(h) | Conv.<br>(%) | Yield<br>(%) |
|-------|----------------|-------------------------|-------------|--------------|--------------|
| 1     | 3              | 1                       | 24          | 100          | 72           |
| 2     | 5              | 1                       | 24          | 100          | 70           |
| 3     | 3              | 3                       | 24          | 100          | 89           |
| 4     | 3              | 3                       | 12          | 100          | 90           |
| 5     | 3              | 3                       | 10          | 100          | 77           |

<sup>a</sup> General conditions: **4a** (0.2 mmol), **2a** (20 equiv.), *p*-TsOH (20 mol%), 120 °C, toluene (2 mL), under argon, in autoclave; yields determined by GC using biphenyl as the internal standard.

## 4. Amalgamation experiments

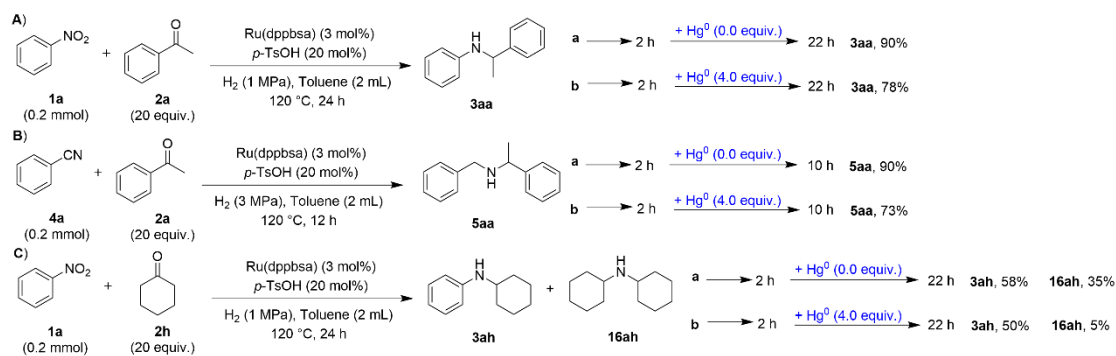

Scheme S1 Amalgamation experiments

## 5. Detection of *p*-cymene

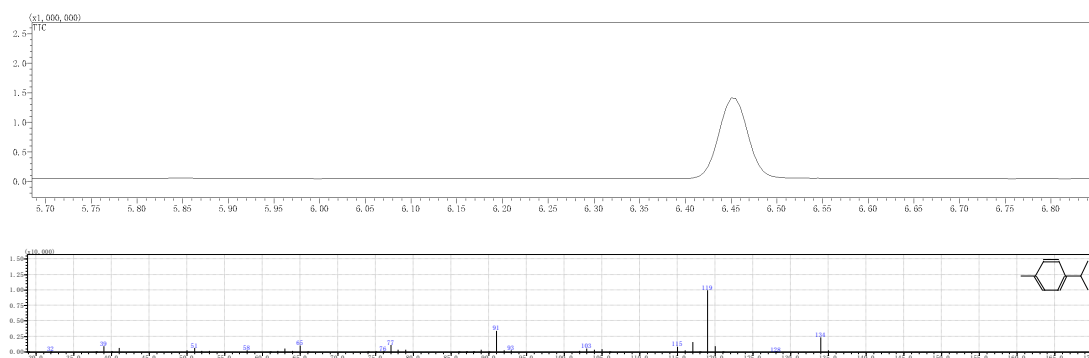

Fig. S1 GC-MS analysis of *p*-cymene in the evaluation of catalytic performance

## 6. NMR, GC and GC-MS Data

### 1. *N*-(1-Phenylethyl) Aniline (3aa)

Analytically pure product was isolated by a column chromatography on silica gel (hexanes/EtOAc = 100:1). Yellow liquid, Yield: 32.7 mg, 83%.  $^1\text{H NMR}$  (600 MHz,  $\text{CDCl}_3$ , 298 K):  $\delta$  = 7.39 (d,  $^3J_{\text{HH}}$  = 4.0 Hz, 2H, Ph), 7.31 (d,  $^3J_{\text{HH}}$  = 6.8 Hz, 2H, Ph), 7.21 (m, 6H, Ph), 4.51 (s, 1H, NH), 3.47 (q,  $^3J_{\text{HH}}$  = 7.0 Hz, 1H, CH), 1.20 (t,  $^3J_{\text{HH}}$  = 7.0 Hz, 3H,  $\text{CH}_3$ ).  $^{13}\text{C}\{^1\text{H}\}$  NMR (151 MHz,  $\text{CDCl}_3$ , 298 K):  $\delta$  = 135.0, 133.9, 129.2 (2C), 128.9 (2C), 128.7 (2C), 128.6 (2C), 124.5 (2C), 64.6, 19.1.

GC-MS (m/z): Calcd. 197; Found 197.

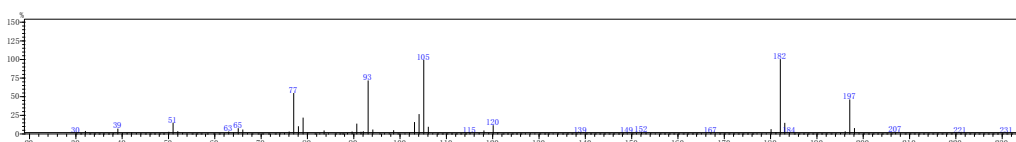

### 2. *N*-(4-Methoxyphenyl)-*N*-(1-Phenylethyl) Amine (3ba)

Analytically pure product was isolated by a column chromatography on silica gel (hexanes/EtOAc = 50:1). Yellow liquid, Yield: 36.8 mg, 81%.  $^1\text{H NMR}$  (600 MHz,  $\text{CDCl}_3$ , 298 K):  $\delta$  = 7.27 (d,  $^3J_{\text{HH}}$  = 7.2 Hz, 2H, Ph), 7.22 (t,  $^3J_{\text{HH}}$  = 7.7 Hz, 2H, Ph), 7.12 (m, 1H, Ph), 6.60 (m, 2H, Ph), 6.38 (m, 2H, Ph), 4.32 (q,  $^3J_{\text{HH}}$  = 6.6 Hz, 1H, CH), 3.77 (s, 1H, NH), 3.59 (s, 3H,  $\text{CH}_3$ ), 1.40 (d,  $^3J_{\text{HH}}$  = 6.7 Hz, 3H,  $\text{CH}_3$ ).  $^{13}\text{C}\{^1\text{H}\}$  NMR (151 MHz,  $\text{CDCl}_3$ , 298 K):  $\delta$  = 152.0, 145.4, 141.5, 128.6 (2C), 126.8, 125.9 (2C), 114.8 (2C), 114.6 (2C), 55.7, 54.3, 25.1.

GC-MS (m/z): Calcd. 227; Found 227.

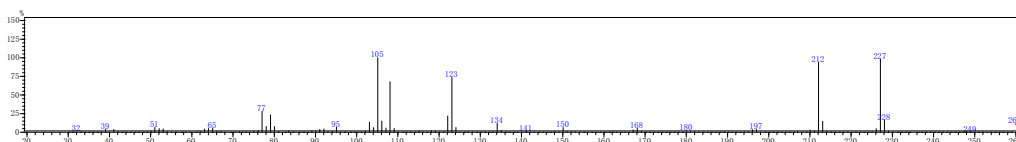

### 3. 4-Methyl-*N*-(1-Phenylethyl) Aniline (3ca)

Analytically pure product was isolated by a column chromatography on silica gel (hexanes/EtOAc = 50:1). Yellow liquid, Yield: 36.3 mg, 86%.  $^1\text{H NMR}$  (600 MHz,  $\text{CDCl}_3$ , 298 K):  $\delta$  = 7.27 (d,  $^3J_{\text{HH}}$  = 7.9 Hz, 2H, Ph), 7.21 (t,  $^3J_{\text{HH}}$  = 7.6 Hz, 2H, Ph), 7.12 (m, 1H, Ph), 6.81 (d,  $^3J_{\text{HH}}$  = 8.3 Hz, 2H, Ph), 6.35 (d,  $^3J_{\text{HH}}$  = 8.2 Hz, 2H, Ph), 4.36 (q,  $^3J_{\text{HH}}$  = 6.7 Hz, 1H, CH), 3.90 (s, 1H, NH), 2.09 (s, 3H,  $\text{CH}_3$ ), 1.41 (d,  $^3J_{\text{HH}}$  = 6.7 Hz, 3H,  $\text{CH}_3$ ).  $^{13}\text{C}\{^1\text{H}\}$  NMR

(151 MHz, CDCl<sub>3</sub>, 298 K):  $\delta$  = 144.3, 143.8, 128.5 (2C), 127.5 (2C), 125.7 (2C), 124.8 (2C), 112.4 (2C), 52.7, 23.9, 19.3.

GC-MS (m/z): Calcd. 211; Found 211.

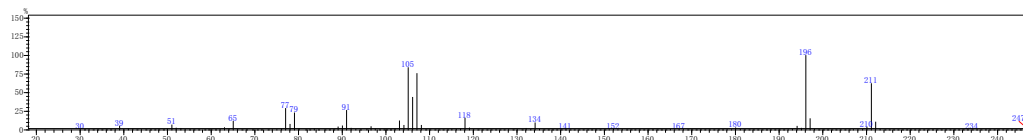

#### 4. *N*-(1-Phenylethyl)-[1,1'-Biphenyl]-4-Amine (3da)

Analytically pure product was isolated by a column chromatography on silica gel (hexanes/EtOAc = 50:1). Yellow liquid, Yield: 38.2 mg, 70%. <sup>1</sup>H NMR (600 MHz, CDCl<sub>3</sub>, 298 K):  $\delta$  = 7.39 (d, <sup>3</sup>J<sub>HH</sub> = 7.1 Hz, 2H, Ph), 7.32 (d, <sup>3</sup>J<sub>HH</sub> = 7.1 Hz, 2H, Ph), 7.29 (m, 2H, Ph), 7.27 (m, 2H, Ph), 7.25 (m, 3H, Ph), 7.18 (s, 3H, Ph), 6.62 (s, 1H, NH), 4.46 (q, <sup>3</sup>J<sub>HH</sub> = 6.9 Hz, 1H, CH), 2.10 (s, 3H, CH<sub>3</sub>), 1.54 (d, <sup>3</sup>J<sub>HH</sub> = 5.7 Hz, 3H, CH<sub>3</sub>).

GC-MS (m/z): Calcd. 273; Found 273.

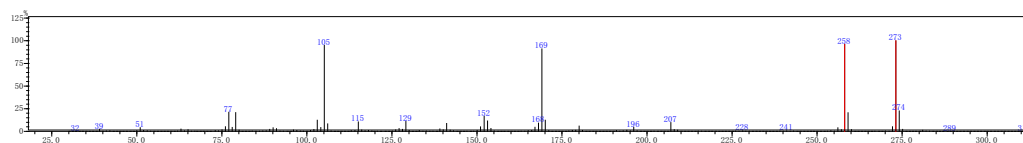

#### 5. 4-Fluoro-*N*-(1-Phenylethyl) Aniline (3ea)

Analytically pure product was isolated by a column chromatography on silica gel (hexanes/EtOAc = 50:1). Yellow liquid, Yield: 33.1 mg, 77%. <sup>1</sup>H NMR (600 MHz, CDCl<sub>3</sub>, 298 K):  $\delta$  = 7.24 (m, 4H, Ph), 7.15 (t, <sup>3</sup>J<sub>HH</sub> = 7.2 Hz, 1H, Ph), 6.75 (m, 2H, Ph), 6.30 (m, 2H, Ph), 4.33 (q, <sup>3</sup>J<sub>HH</sub> = 6.7 Hz, 1H, CH), 3.96 (s, 1H, NH), 1.42 (d, <sup>3</sup>J<sub>HH</sub> = 6.7 Hz, 3H, CH<sub>3</sub>). <sup>13</sup>C{<sup>1</sup>H} NMR (151 MHz, CDCl<sub>3</sub>, 298 K):  $\delta$  = 155.7 (d,  $J_F$  = 251.3 Hz), 144.9, 143.4, 128.7 (2C), 127.0 (2C), 125.8 (2C), 115.5 (d,  $J_F$  = 23.8 Hz, 2C), 114.2 (d,  $J_F$  = 8.0 Hz), 54.2, 25.0. <sup>19</sup>F NMR (564 MHz, CDCl<sub>3</sub>, 298 K):  $\delta$  = -125.8.

GC-MS (m/z): Calcd. 215; Found 215.

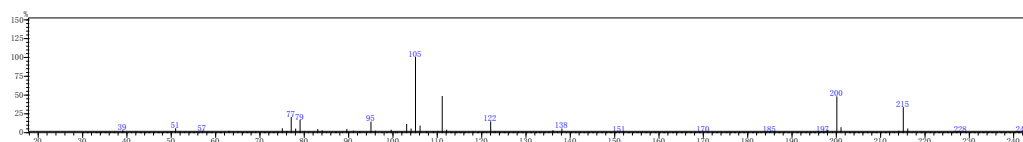

#### 6. 4-Chloro-*N*-(1-Phenylethyl) Aniline (3fa)

Analytically pure product was isolated by a column chromatography on silica gel (hexanes/EtOAc = 50:1). Yellow liquid, Yield: 33.7 mg, 73%. <sup>1</sup>H NMR (600 MHz, CDCl<sub>3</sub>,

298 K):  $\delta$  = 7.31 (m, 4H, Ph), 7.23 (m, 1H, Ph), 7.01 (m, 2H, Ph), 6.44 (d,  $^3J_{\text{HH}}$  = 8.6 Hz, 2H, Ph), 4.43 (q,  $^3J_{\text{HH}}$  = 6.7 Hz, 1H, CH), 1.52 (d,  $^3J_{\text{HH}}$  = 6.7 Hz, 3H, CH<sub>3</sub>). **<sup>13</sup>C{<sup>1</sup>H} NMR** (151 MHz, CDCl<sub>3</sub>, 298 K):  $\delta$  = 145.3, 144.3, 128.9 (2C), 128.7 (2C), 127.1, 125.8 (2C), 124.1 (2C), 114.7, 53.9, 24.7.

GC-MS (m/z): Calcd. 231; Found 231.

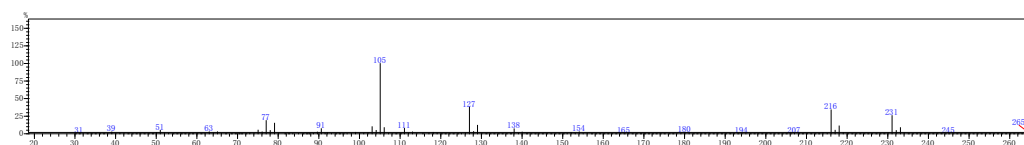

### 7. 4-Bromo-N-(1-Phenylethyl) Aniline (3ga)

Analytically pure product was isolated by a column chromatography on silica gel (hexanes/EtOAc = 50:1). Yellow liquid, Yield: 30.5 mg, 55%. **<sup>1</sup>H NMR** (600 MHz, CDCl<sub>3</sub>, 298 K):  $\delta$  = 7.22 (m, 2H, Ph), 7.13 (m, 4H, Ph), 7.05 (d,  $^3J_{\text{HH}}$  = 8.8 Hz, 1H, Ph), 6.27 (d,  $^3J_{\text{HH}}$  = 8.6 Hz, 2H, Ph), 4.32 (q,  $^3J_{\text{HH}}$  = 6.8 Hz, 1H, CH), 3.97 (s, 1H, NH), 1.40 (d,  $^3J_{\text{HH}}$  = 6.8 Hz, 3H, CH<sub>3</sub>). **<sup>13</sup>C{<sup>1</sup>H} NMR** (151 MHz, CDCl<sub>3</sub>, 298 K):  $\delta$  = 146.2, 144.6, 131.8 (2C), 128.8 (2C), 127.1, 125.8 (2C), 114.9 (2C), 108.9, 53.9, 24.7.

GC-MS (m/z): Calcd. 276; Found 277.

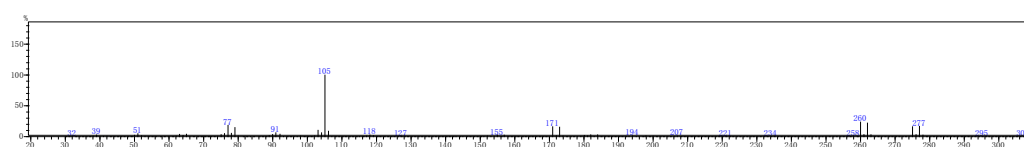

### 8. N-(1-Phenylethyl)-4-(Trifluoromethyl) Aniline (3ha)

Analytically pure product was isolated by a column chromatography on silica gel (hexanes/EtOAc = 50:1). Yellow liquid, Yield: 34.5 mg, 65%. **<sup>1</sup>H NMR** (600 MHz, CDCl<sub>3</sub>, 298 K):  $\delta$  = 7.25 (m, 5H, Ph), 7.18 (m, 2H, Ph), 6.45 (d,  $^3J_{\text{HH}}$  = 8.1 Hz, 2H, Ph), 4.44 (q,  $^3J_{\text{HH}}$  = 6.8 Hz, 1H, CH), 1.47 (d,  $^3J_{\text{HH}}$  = 7.0 Hz, 3H, CH<sub>3</sub>). **<sup>19</sup>F NMR** (564 MHz, CDCl<sub>3</sub>, 298 K):  $\delta$  = -61.1.

GC-MS (m/z): Calcd. 265; Found 265.

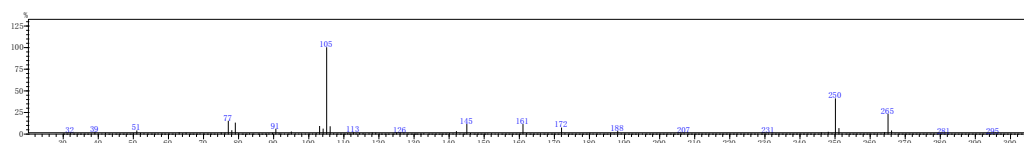

### 9. Methyl-4-((1-Phenylethyl) Amino) Benzoate (3ia)

Analytically pure product was isolated by a column chromatography on silica gel

(hexanes/EtOAc = 50:1). Yellow liquid, Yield: 34.6 mg, 68%. **<sup>1</sup>H NMR** (600 MHz, CDCl<sub>3</sub>, 298 K): δ = 7.70 (d, <sup>3</sup>J<sub>HH</sub> = 7.0 Hz, 2H, Ph), 7.24 (m, 4H, Ph), 7.16 (m, 1H, Ph), 6.40 (d, <sup>3</sup>J<sub>HH</sub> = 8.1 Hz, 2H, Ph), 4.47 (q, <sup>3</sup>J<sub>HH</sub> = 6.6 Hz, 1H, CH), 3.79 (s, 1H, NH), 3.73 (s, 3H, CH<sub>3</sub>), 1.46 (d, <sup>3</sup>J<sub>HH</sub> = 7.2 Hz, 3H, CH<sub>3</sub>). **<sup>13</sup>C{<sup>1</sup>H} NMR** (151 MHz, CDCl<sub>3</sub>, 298 K): δ = 167.2, 150.8, 144.0, 131.4 (2C), 128.8 (2C), 127.2, 125.7 (2C), 118.5, 112.3 (2C), 53.2, 51.5, 24.6. GC-MS (m/z): Calcd. 255; Found 255.

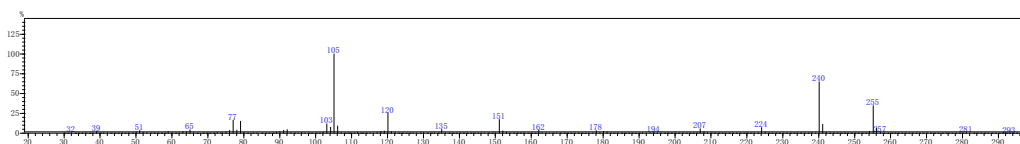

### 10. *N*-(1-Phenylethyl) Naphthalen-1-Amine (3ja)

Analytically pure product was isolated by a column chromatography on silica gel (hexanes/EtOAc = 50:1). Brown liquid, Yield: 31.6 mg, 64%. **<sup>1</sup>H NMR** (600 MHz, CDCl<sub>3</sub>, 298 K): δ = 7.77 (d, <sup>3</sup>J<sub>HH</sub> = 8.0 Hz, 1H, Ph), 7.26 (m, 5H, Ph), 7.16 (m, 3H, Ph), 7.05 (d, <sup>3</sup>J<sub>HH</sub> = 7.1 Hz, 1H, Ph), 6.51 (d, <sup>3</sup>J<sub>HH</sub> = 9.7 Hz, 1H, Ph), 5.56 (dd, <sup>3</sup>J<sub>HH</sub> = 9.8, 4.8 Hz, 1H, Ph), 4.24 (t, <sup>3</sup>J<sub>HH</sub> = 4.5 Hz, 1H, CH), 3.66 (m, 1H, NH), 1.00 (d, <sup>3</sup>J<sub>HH</sub> = 7.0 Hz, 3H, CH<sub>3</sub>). **<sup>13</sup>C{<sup>1</sup>H} NMR** (151 MHz, CDCl<sub>3</sub>, 298 K): δ = 157.5, 144.1, 133.9, 130.0, 128.9, 128.1 (2C), 127.8, 127.7, 127.6 (2C), 127.4 (2C), 127.1, 126.3, 123.3, 42.6, 13.3.

GC-MS (m/z): Calcd. 247; Found 247.

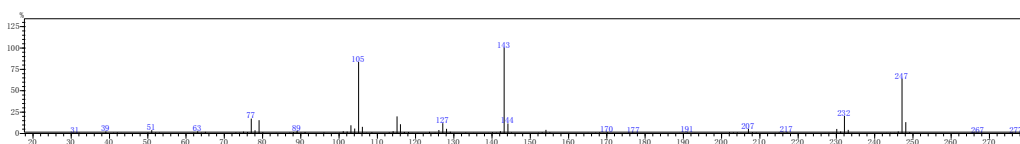

### 11. 3-Methyl-*N*-(1-Phenylethyl) Aniline (3ka)

Analytically pure product was isolated by a column chromatography on silica gel (hexanes/EtOAc = 50:1). Yellow liquid, Yield: 23.2 mg, 55%. **<sup>1</sup>H NMR** (600 MHz, CDCl<sub>3</sub>, 298 K): δ = 7.36 (d, <sup>3</sup>J<sub>HH</sub> = 7.5 Hz, 2H, Ph), 7.30 (t, <sup>3</sup>J<sub>HH</sub> = 7.6 Hz, 2H, Ph), 7.21 (t, <sup>3</sup>J<sub>HH</sub> = 7.2 Hz, 1H, Ph), 6.97 (t, <sup>3</sup>J<sub>HH</sub> = 7.8 Hz, 1H, Ph), 6.47 (d, <sup>3</sup>J<sub>HH</sub> = 7.4 Hz, 1H, Ph), 6.37 (s, 1H, Ph), 6.31 (d, <sup>3</sup>J<sub>HH</sub> = 8.0 Hz, 1H, Ph), 4.47 (q, <sup>3</sup>J<sub>HH</sub> = 6.7 Hz, 1H, CH), 4.05 (s, 1H, NH), 2.20 (s, 3H, CH<sub>3</sub>), 1.50 (d, <sup>3</sup>J<sub>HH</sub> = 6.7 Hz, 3H, CH<sub>3</sub>). **<sup>13</sup>C{<sup>1</sup>H} NMR** (151 MHz, CDCl<sub>3</sub>, 298 K): δ = 147.1, 145.2, 138.8, 128.9, 128.6 (2C), 126.8, 125.8 (2C), 118.3, 114.2, 110.4, 53.5, 24.8, 21.5 (2C).

GC-MS (m/z): Calcd. 211; Found 211.

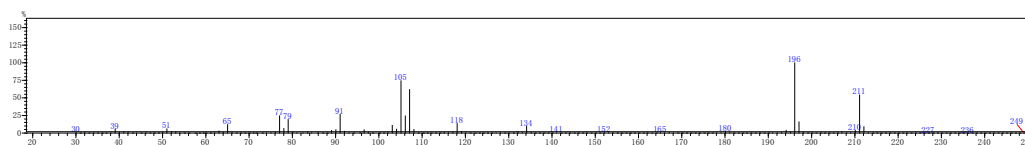

### 12. 2-Methyl-N-(1-Phenylethyl) Aniline (3la)

Analytically pure product was isolated by a column chromatography on silica gel (hexanes/EtOAc = 50:1). Yellow liquid, Yield: 31.7 mg, 75%.  $^1\text{H NMR}$  (600 MHz,  $\text{CDCl}_3$ , 298 K):  $\delta$  = 7.26 (d,  $^3J_{\text{HH}}$  = 7.2 Hz, 2H, Ph), 7.21 (t,  $^3J_{\text{HH}}$  = 7.4 Hz, 2H, Ph), 7.12 (m, 1H, Ph), 6.95 (d,  $^3J_{\text{HH}}$  = 7.7 Hz, 1H, Ph), 6.86 (t,  $^3J_{\text{HH}}$  = 8.1 Hz, 1H, Ph), 6.51 (t,  $^3J_{\text{HH}}$  = 7.4 Hz, 1H, Ph), 6.28 (d,  $^3J_{\text{HH}}$  = 7.8 Hz, 1H, Ph), 4.44 (q,  $^3J_{\text{HH}}$  = 6.4 Hz, 1H, CH), 3.75 (s, 1H, NH), 2.13 (s, 3H,  $\text{CH}_3$ ), 1.46 (d,  $^3J_{\text{HH}}$  = 7.0 Hz, 3H,  $\text{CH}_3$ ).  $^{13}\text{C}\{^1\text{H}\}$  NMR (151 MHz,  $\text{CDCl}_3$ , 298 K):  $\delta$  = 148.2, 145.9, 144.9, 132.9 (2C), 131.5 (2C), 129.9 (2C), 128.7, 119.8, 114.0, 56.2, 28.1, 20.5 (2C).

GC-MS (m/z): Calcd. 211; Found 211.

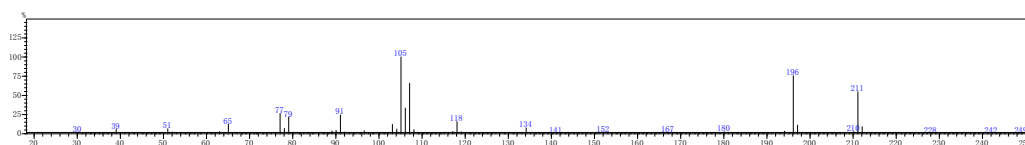

### 13. 2,4-Dimethyl-N-(1-Phenylethyl) Aniline (3ma)

Analytically pure product was isolated by a column chromatography on silica gel (hexanes/EtOAc = 50:1). Yellow liquid, Yield: 38.3 mg, 85%.  $^1\text{H NMR}$  (600 MHz,  $\text{CDCl}_3$ , 298 K):  $\delta$  = 7.27 (d,  $^3J_{\text{HH}}$  = 7.3 Hz, 2H, Ph), 7.22 (t,  $^3J_{\text{HH}}$  = 7.3 Hz, 2H, Ph), 7.12 (t,  $^3J_{\text{HH}}$  = 7.1 Hz, 1H, Ph), 6.79 (s, 1H, Ph), 6.67 (d,  $^3J_{\text{HH}}$  = 8.7 Hz, 1H, Ph), 6.20 (d,  $^3J_{\text{HH}}$  = 8.2 Hz, 1H, Ph), 4.42 (q,  $^3J_{\text{HH}}$  = 6.7 Hz, 1H, CH), 3.64 (s, 1H, NH), 2.10 (d,  $^3J_{\text{HH}}$  = 11.9 Hz, 6H,  $\text{CH}_3$ ), 1.46 (d,  $^3J_{\text{HH}}$  = 6.7 Hz, 3H,  $\text{CH}_3$ ).  $^{13}\text{C}\{^1\text{H}\}$  NMR (151 MHz,  $\text{CDCl}_3$ , 298 K):  $\delta$  = 145.4, 142.9, 130.9, 128.6 (2C), 127.2 (2C), 126.8, 125.8 (2C), 121.8, 111.3, 53.57, 25.3, 17.6 (2C).

GC-MS (m/z): Calcd. 225; Found 225.

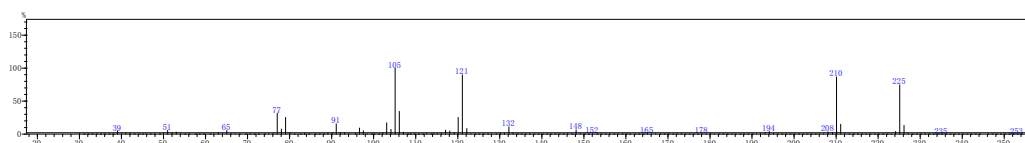

### 14. N-(1-Phenylethyl)-9H-Fluoren-2-Amine (3na)

Analytically pure product was isolated by a column chromatography on silica gel



(hexanes/EtOAc = 50:1). Yellow liquid, Yield: 38.2 mg, 67%.  $^1\text{H NMR}$  (600 MHz,  $\text{CDCl}_3$ , 298 K):  $\delta$  = 7.46 (d,  $^3J_{\text{HH}}$  = 7.5 Hz, 1H, Ph), 7.38 (d,  $^3J_{\text{HH}}$  = 8.2 Hz, 1H, Ph), 7.29 (m, 3H, Ph), 7.22 (t,  $^3J_{\text{HH}}$  = 7.6 Hz, 2H, Ph), 7.16 (t,  $^3J_{\text{HH}}$  = 7.4 Hz, 1H, Ph), 7.12 (t,  $^3J_{\text{HH}}$  = 7.3 Hz, 1H, Ph), 7.03 (t,  $^3J_{\text{HH}}$  = 7.3 Hz, 1H, Ph), 6.57 (s, 1H, Ph), 6.43 (dd,  $^3J_{\text{HH}}$  = 8.3, 1.5 Hz, 1H, Ph), 4.44 (q,  $^3J_{\text{HH}}$  = 6.6 Hz, 1H, CH), 4.06 (s, 1H, NH), 3.61 (dd,  $^3J_{\text{HH}}$  = 27.1, 21.5 Hz, 2H,  $\text{CH}_2$ ), 1.42 (d,  $^3J_{\text{HH}}$  = 6.7 Hz, 3H,  $\text{CH}_3$ ).  $^{13}\text{C}\{^1\text{H}\}$  NMR (151 MHz,  $\text{CDCl}_3$ , 298 K):  $\delta$  = 146.8, 145.2, 145.0, 142.4, 142.2, 131.9, 128.7 (2C), 127.0, 126.6, 125.9 (2C), 124.8, 124.7, 120.6, 118.4, 112.5, 109.9, 53.7, 37.0, 25.0.

GC-MS (m/z): Calcd. 285; Found 285.

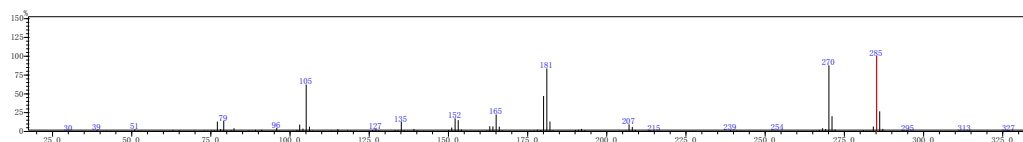

### 15. *N*-(1-Phenylethyl)-1,2,3,4-Tetrahydroquinolin-7-Amine (3oa)

GC-MS (m/z): Calcd. 252; Found 252.

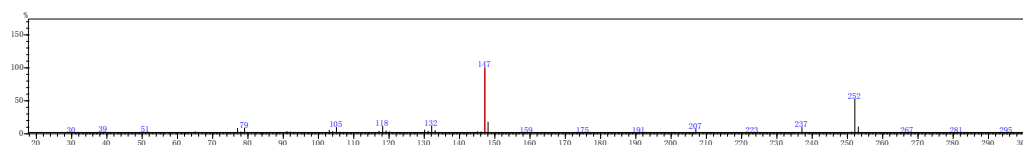

### 16. 5-Methoxy-*N*-(1-Phenylethyl) Pyridin-2-Amine (3pa)

GC-MS (m/z): Calcd. 228; Found 228.

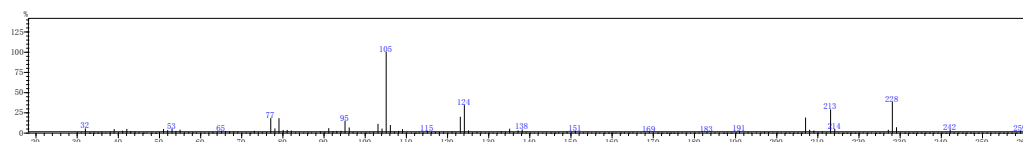

### 17. 4-Morpholino-*N*-(1-Phenylethyl) Aniline (3qa)

GC-MS (m/z): Calcd. 282; Found 282.

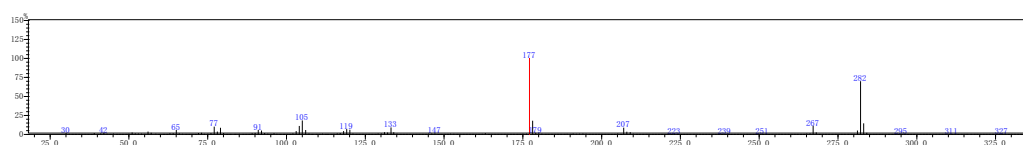

### 18. 4-Phenoxy-*N*-(1-Phenylethyl) Aniline (3ra)

Analytically pure product was isolated by a column chromatography on silica gel (hexanes/EtOAc = 50:1). Yellow liquid, Yield: 36.4 mg, 63%.  $^1\text{H NMR}$  (600 MHz,  $\text{CDCl}_3$ , 298 K):  $\delta$  = 7.27 (d,  $^3J_{\text{HH}}$  = 7.3 Hz, 2H, Ph), 7.22 (t,  $^3J_{\text{HH}}$  = 7.6 Hz, 2H, Ph), 7.13 (m, 3H,

Ph), 6.87 (t,  $^3J_{\text{HH}} = 7.4$  Hz, 1H, Ph), 6.79 (d,  $^3J_{\text{HH}} = 7.8$  Hz, 2H, Ph), 6.71 (m, 2H, Ph), 6.39 (d,  $^3J_{\text{HH}} = 8.8$  Hz, 2H, Ph), 4.34 (q,  $^3J_{\text{HH}} = 6.7$  Hz, 1H, CH), 3.90 (s, 1H, NH), 1.41 (d,  $^3J_{\text{HH}} = 6.7$  Hz, 3H, CH<sub>3</sub>).  **$^{13}\text{C}\{^1\text{H}\}$  NMR** (151 MHz, CDCl<sub>3</sub>, 298 K):  $\delta = 159.0, 147.6, 145.2, 143.9, 129.5$  (2C), 128.7 (2C), 127.0, 125.9 (2C), 121.9, 121.0 (2C), 117.2 (2C), 114.3 (2C), 54.1, 25.1.

GC-MS (m/z): Calcd. 289; Found 289.

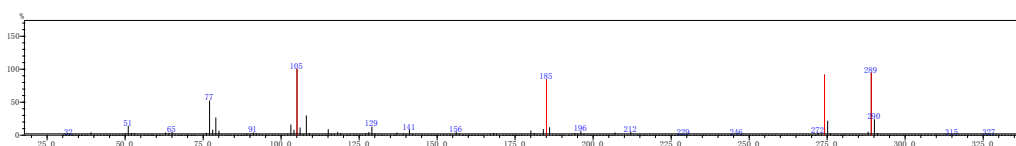

### 19. 4-(Methylthio)-*N*-(1-Phenylethyl) Aniline (3sa)

Analytically pure product was isolated by a column chromatography on silica gel (hexanes/EtOAc = 50:1). Yellow liquid, Yield: 36.9 mg, 76%.  **$^1\text{H}$  NMR** (600 MHz, CDCl<sub>3</sub>, 298 K):  $\delta = 7.23$  (m, 4H, Ph), 7.13 (t,  $^3J_{\text{HH}} = 7.1$  Hz, 1H, Ph), 7.03 (dt,  $^3J_{\text{HH}} = 8.8, 2.5$  Hz, 2H, Ph), 6.36 (dt,  $^3J_{\text{HH}} = 8.6, 2.4$  Hz, 2H, Ph), 4.36 (q,  $^3J_{\text{HH}} = 6.7$  Hz, 1H, CH), 4.02 (s, 1H, NH), 2.26 (s, 3H, CH<sub>3</sub>), 1.41 (d,  $^3J_{\text{HH}} = 6.8$  Hz, 3H, CH<sub>3</sub>).  **$^{13}\text{C}\{^1\text{H}\}$  NMR** (151 MHz, CDCl<sub>3</sub>, 298 K):  $\delta = 146.0, 144.9, 131.3$  (2C), 128.7 (2C), 127.0, 125.8 (2C), 124.2, 114.0 (2C), 53.6, 24.9, 19.1.

GC-MS (m/z): Calcd. 243; Found 243.

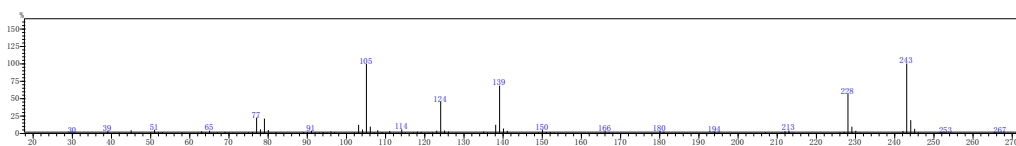

### 20. *N*-(1-(4-Methoxyphenyl) Ethyl) Aniline (3ab)

Analytically pure product was isolated by a column chromatography on silica gel (hexanes/EtOAc = 50:1). Yellow liquid, Yield: 23.6 mg, 52%.  **$^1\text{H}$  NMR** (600 MHz, CDCl<sub>3</sub>, 298 K):  $\delta = 7.29$  (d,  $^3J_{\text{HH}} = 7.7$  Hz, 2H, Ph), 7.10 (m, 2H, Ph), 6.86 (m, 2H, Ph), 6.66 (t,  $^3J_{\text{HH}} = 7.1$  Hz, 2H, Ph), 6.54 (d,  $^3J_{\text{HH}} = 8.3$  Hz, 2H, Ph), 4.46 (q,  $^3J_{\text{HH}} = 6.7$  Hz, 1H, CH), 3.79 (s, 3H, CH<sub>3</sub>), 1.51 (d,  $^3J_{\text{HH}} = 6.6$  Hz, 3H, CH<sub>3</sub>).  **$^{13}\text{C}\{^1\text{H}\}$  NMR** (151 MHz, CDCl<sub>3</sub>, 298 K):  $\delta = 158.5, 151.3, 147.1, 137.1, 129.1$  (2C), 126.9 (2C), 114.0 (2C), 113.3, 113.0, 55.2, 52.9, 24.9.

GC-MS (m/z): Calcd. 227; Found 227.

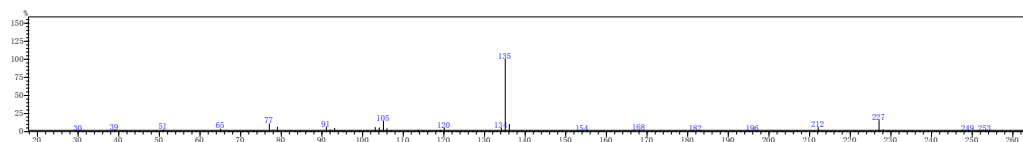

### 21. *N*-(1-(*p*-Tolyl) Ethyl) Aniline (3ac)

GC-MS (m/z): Calcd. 211; Found 211.

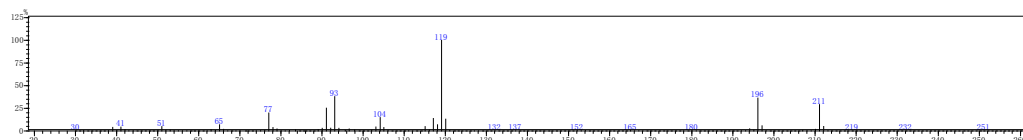

### 22. *N*-(1-(4-Fluorophenyl) Ethyl) Aniline (3ad)

Analytically pure product was isolated by a column chromatography on silica gel (hexanes/EtOAc = 50:1). Yellow liquid, Yield: 29.2 mg, 68%.  $^1\text{H NMR}$  (600 MHz,  $\text{CDCl}_3$ , 298 K):  $\delta$  = 7.34 (m, 2H, Ph), 7.10 (m, 2H, Ph), 7.00 (t,  $^3J_{\text{HH}}$  = 8.6 Hz, 2H, Ph), 6.68 (t,  $^3J_{\text{HH}}$  = 7.7 Hz, 1H, Ph), 6.51 (d,  $^3J_{\text{HH}}$  = 8.3 Hz, 2H, Ph), 4.47 (q,  $^3J_{\text{HH}}$  = 7.2 Hz, 1H, CH), 4.34 (m, 1H, NH), 1.51 (d,  $^3J_{\text{HH}}$  = 7.1 Hz, 3H,  $\text{CH}_3$ ).  $^{13}\text{C}\{^1\text{H}\}$  NMR (151 MHz,  $\text{CDCl}_3$ , 298 K):  $\delta$  = 161.7 (d,  $J_{\text{F}}$  = 261.3 Hz), 150.8, 140.7, 130.0 (d,  $J_{\text{F}}$  = 7.8 Hz), 129.1 (2C), 128.6 (d,  $J_{\text{F}}$  = 8.6 Hz), 128.3, 127.4 (d,  $J_{\text{F}}$  = 8.5 Hz), 115.4 (d,  $J_{\text{F}}$  = 22.2 Hz), 114.4 (d,  $J_{\text{F}}$  = 22.8 Hz), 113.5, 66.7, 25.0.  $^{19}\text{F NMR}$  (564 MHz,  $\text{CDCl}_3$ , 298 K):  $\delta$  = -115.8.

GC-MS (m/z): Calcd. 215; Found 215.

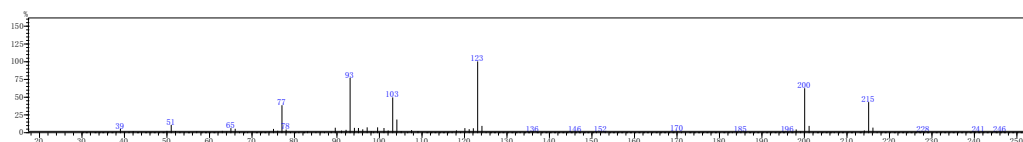

### 23. *N*-(1-(4-(Trifluoromethyl) Phenyl) Ethyl) Aniline (3ae)

GC-MS (m/z): Calcd. 265; Found 265.

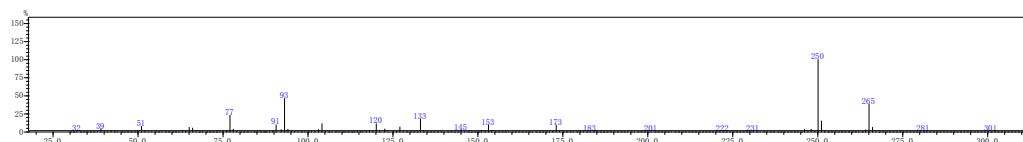

### 24. *N*-(1-Phenylpropyl) Aniline (3af)

GC-MS (m/z): Calcd. 211; Found 211.

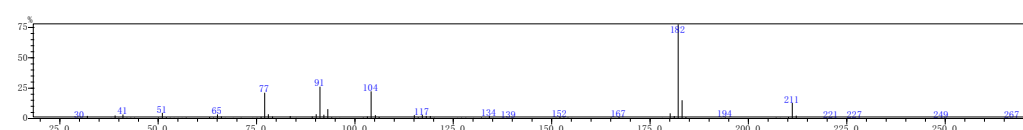

## 25. *N*-Isopropylaniline (3ag)

GC-MS (m/z): Calcd. 135; Found 135.

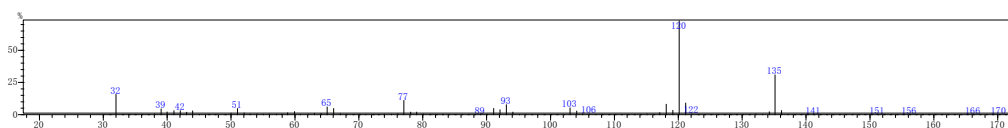

## 26. *N*-cyclohexylaniline (3ah)

GC-MS (m/z): Calcd. 175; Found 175.

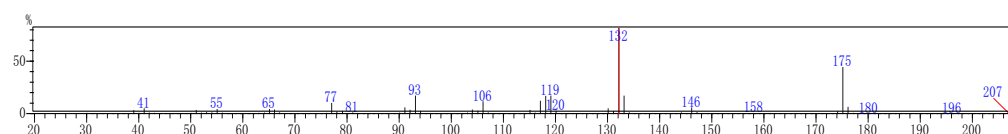

## 27. *N*-Benzyl-1-Phenylethan-1-Amine (5aa)

Analytically pure product was isolated by a column chromatography on silica gel (hexanes/EtOAc = 50:1). Yellow liquid, Yield: 35.0 mg, 83%.  $^1\text{H NMR}$  (600 MHz,  $\text{CDCl}_3$ , 298 K):  $\delta$  = 7.39 (m, 4H, Ph), 7.36 (d,  $^3J_{\text{HH}}$  = 5.9 Hz, 1H, Ph), 7.34 (s, 1H, Ph), 7.33 (m, 2H, Ph), 7.31 (m, 1H, Ph), 7.28 (t,  $^3J_{\text{HH}}$  = 5.4 Hz, 1H), 3.85 (q,  $^3J_{\text{HH}}$  = 7.2 Hz, 1H, CH), 3.67 (dd,  $^3J_{\text{HH}}$  = 39.0, 13.1 Hz, 2H,  $\text{CH}_2$ ), 1.71 (s, 1H, NH), 1.41 (d,  $^3J_{\text{HH}}$  = 7.7 Hz, 3H,  $\text{CH}_3$ ).  $^{13}\text{C}\{^1\text{H}\}$  NMR (151 MHz,  $\text{CDCl}_3$ , 298 K):  $\delta$  = 145.4, 140.5, 128.5 (2C), 128.3 (2C), 128.1, 127.0, 126.9, 126.7 (2C), 57.5 (2C), 51.6, 24.4.

GC-MS (m/z): Calcd. 211; Found 211.

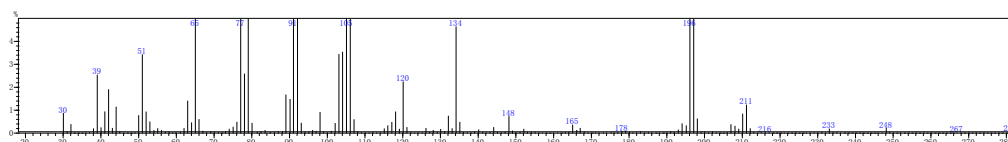

## 28. *N*-(4-Methoxybenzyl)-1-Phenylethan-1-Amine (5ba)

Analytically pure product was isolated by a column chromatography on silica gel (hexanes/EtOAc = 50:1). Yellow liquid, Yield: 35.2 mg, 73%.  $^1\text{H NMR}$  (600 MHz,  $\text{CDCl}_3$ , 298 K):  $\delta$  = 7.26 (m, 4H, Ph), 7.17 (m, 1H, Ph), 7.11 (d,  $^3J_{\text{HH}}$  = 8.6 Hz, 2H, Ph), 6.76 (m, 2H, Ph), 3.72 (m, 1H, CH), 3.70 (s, 3H,  $\text{CH}_3$ ), 3.48 (q,  $^3J_{\text{HH}}$  = 12.9 Hz, 2H,  $\text{CH}_2$ ), 1.53 (s, 1H, NH), 1.28 (d,  $^3J_{\text{HH}}$  = 6.6 Hz, 3H,  $\text{CH}_3$ ).  $^{13}\text{C}\{^1\text{H}\}$  NMR (151 MHz,  $\text{CDCl}_3$ , 298 K):  $\delta$  = 158.6, 145.6, 132.8, 129.3 (2C), 128.4 (2C), 126.9, 126.7 (2C), 113.8 (2C), 57.4, 55.3, 51.0, 24.5.

GC-MS (m/z): Calcd. 241; Found 241.

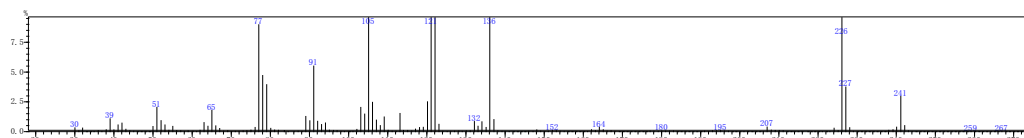

### 29. *N*-(4-Methylbenzyl)-1-Phenylethan-1-Amine (5ca)

Analytically pure product was isolated by a column chromatography on silica gel (hexanes/EtOAc = 50:1). Yellow liquid, Yield: 324.7 mg, 77%.  $^1\text{H NMR}$  (600 MHz,  $\text{CDCl}_3$ , 298 K):  $\delta$  = 7.26 (d,  $^3J_{\text{HH}}$  = 7.3 Hz, 3H, Ph), 7.14 (d,  $^3J_{\text{HH}}$  = 7.9 Hz, 3H, Ph), 7.08 (d,  $^3J_{\text{HH}}$  = 7.3 Hz, 1H, Ph), 7.04 (m, 2H, Ph), 3.72 (q,  $^3J_{\text{HH}}$  = 8.0 Hz, 1H, CH), 3.51 (dd,  $^3J_{\text{HH}}$  = 40.2, 13.1 Hz, 2H,  $\text{CH}_2$ ), 2.25 (s, 3H,  $\text{CH}_3$ ), 1.67 (s, 1H, NH), 1.28 (d,  $^3J_{\text{HH}}$  = 6.7 Hz, 3H).  $^{13}\text{C}\{^1\text{H}\}$  NMR (151 MHz,  $\text{CDCl}_3$ , 298 K):  $\delta$  = 145.5, 137.2, 136.5, 136.4, 129.1 (2C), 128.4, 128.1 (2C), 126.9, 126.7, 52.7, 51.3, 24.4, 21.1.

GC-MS (m/z): Calcd. 225; Found 225.

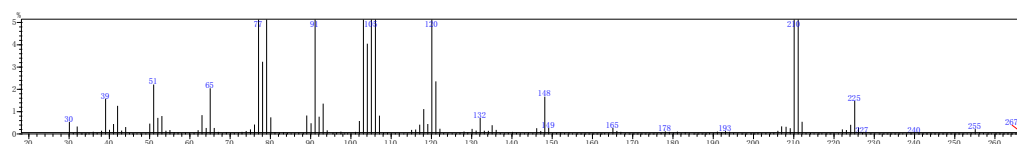

### 30. *N*-([1,1'-Biphenyl]-4-ylmethyl)-1-Phenylethan-1-Amine (5da)

Analytically pure product was isolated by a column chromatography on silica gel (hexanes/EtOAc = 50:1). Yellow liquid, Yield: 37.9 mg, 66%.  $^1\text{H NMR}$  (600 MHz,  $\text{CDCl}_3$ , 298 K):  $\delta$  = 7.48 (m, 3H, Ph), 7.44 (d,  $^3J_{\text{HH}}$  = 8.1 Hz, 2H, Ph), 7.32 (m, 3H, Ph), 7.25 (m, 5H, Ph), 7.16 (m, 1H, Ph), 3.74 (q,  $^3J_{\text{HH}}$  = 6.2 Hz, 1H, CH), 3.57 (dd,  $^3J_{\text{HH}}$  = 34.9, 13.3 Hz, 2H,  $\text{CH}_2$ ), 1.73 (s, 1H, NH), 1.29 (d,  $^3J_{\text{HH}}$  = 6.8 Hz, 3H,  $\text{CH}_3$ ).  $^{13}\text{C}\{^1\text{H}\}$  NMR (151 MHz,  $\text{CDCl}_3$ , 298 K):  $\delta$  = 141.0, 139.9, 128.85 (2C), 128.81, 128.6, 128.5, 127.5, 127.36, 127.34, 127.21 (2C), 127.20, 127.15, 127.12, 127.0, 126.8 (2C), 57.6, 51.3, 24.5.

GC-MS (m/z): Calcd. 287; Found 287.

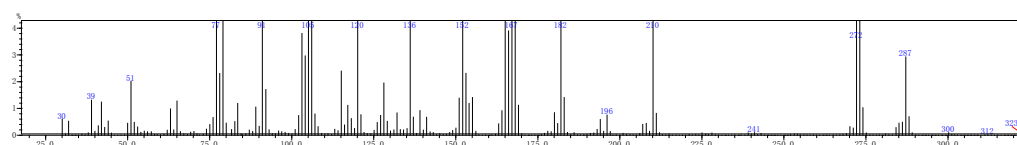

### 31. *N*-(4-Fluorobenzyl)-1-Phenylethan-1-Amine (5ea)

Analytically pure product was isolated by a column chromatography on silica gel (hexanes/EtOAc = 50:1). Yellow liquid, Yield: 31.1 mg, 68%.  $^1\text{H NMR}$  (600 MHz,  $\text{CDCl}_3$ , 298 K):  $\delta$  = 7.35 (d,  $^3J_{\text{HH}}$  = 5.0 Hz, 4H, Ph), 7.30 (m, 1H, Ph), 7.24 (m, 2H, Ph), 6.99 (m,

2H, Ph), 3.80 (q,  $^3J_{\text{HH}} = 6.4$  Hz, 1H, CH), 3.59 (dd,  $^3J_{\text{HH}} = 31.0, 13.2$  Hz, 2H, CH<sub>2</sub>), 1.71 (s, 1H, NH), 1.38 (d,  $^3J_{\text{HH}} = 6.5$  Hz, 3H, CH<sub>3</sub>).  **$^{13}\text{C}\{^1\text{H}\}$  NMR** (151 MHz, CDCl<sub>3</sub>, 298 K):  $\delta = 161.9$  (d,  $J_F = 260.4$  Hz), 145.2, 129.7 (d,  $J_F = 8.5$  Hz), 128.5 (2C), 127.0, 126.7 (2C), 115.2 (2C), 115.0 (2C), 57.5 (d,  $J_F = 4.5$  Hz), 50.8, 24.4.  **$^{19}\text{F}$  NMR** (564 MHz, CDCl<sub>3</sub>, 298 K):  $\delta = -115.9$ .

GC-MS (m/z): Calcd. 229; Found 229.

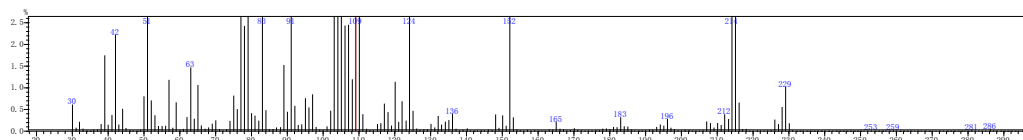

### 32. *N*-(4-Chlorobenzyl)-1-Phenylethan-1-Amine (5fa)

GC-MS (m/z): Calcd. 245; Found 245.

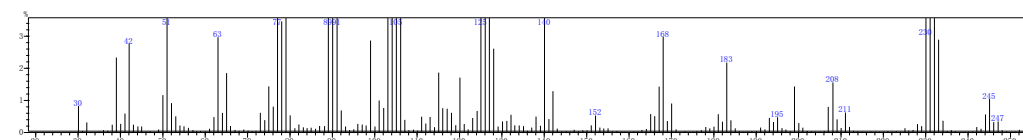

### 33. *N*-(4-Bromobenzyl)-1-Phenylethan-1-Amine (5ga)

GC-MS (m/z): Calcd. 276; Found 276.

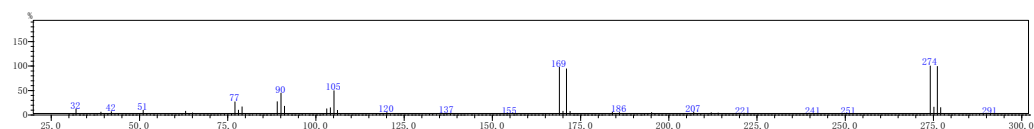

### 34. 1-Phenyl-*N*-(4-(Trifluoromethyl) Benzyl) Ethan-1-Amine (5ha)

GC-MS (m/z): Calcd. 279; Found 278.

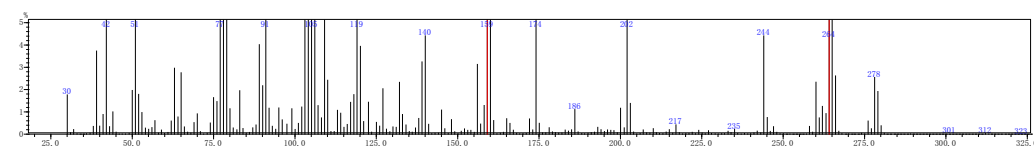

### 35. *N*-(3-Methylbenzyl)-1-Phenylethan-1-Amine (5ia)

Analytically pure product was isolated by a column chromatography on silica gel (hexanes/EtOAc = 50:1). Yellow liquid, Yield: 29.3 mg, 65%.  **$^1\text{H}$  NMR** (600 MHz, CDCl<sub>3</sub>, 298 K):  $\delta = 7.27$  (m, 2H, Ph), 7.19 (m, 1H, Ph), 7.13 (m, 2H, Ph), 7.04 (m, 2H, Ph), 6.99 (m, 2H, Ph), 3.74 (q,  $^3J_{\text{HH}} = 6.1$  Hz, 2H, CH<sub>2</sub>), 3.51 (dd,  $^3J_{\text{HH}} = 37.1, 12.9$  Hz, 1H, CH), 2.27 (d,  $^3J_{\text{HH}} = 8.2$  Hz, 3H, CH<sub>3</sub>), 1.75 (s, 1H, NH), 1.30 (d,  $^3J_{\text{HH}} = 8.2$  Hz, 3H, CH<sub>3</sub>).  **$^{13}\text{C}\{^1\text{H}\}$  NMR** (151 MHz, CDCl<sub>3</sub>, 298 K):  $\delta = 140.1, 138.0, 128.9, 128.9, 128.5, 128.32, 128.30, 127.7,$

127.6, 126.9, 126.7, 125.2, 53.1, 51.6, 24.4, 21.4.

GC-MS (m/z): Calcd. 225; Found 225.

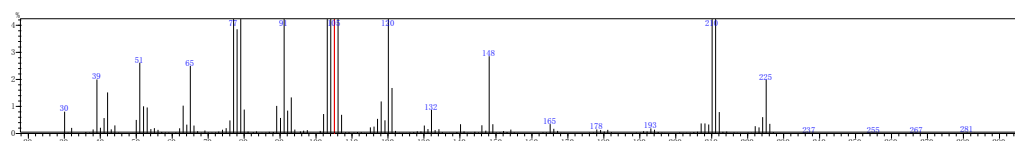

### 36. *N*-(2-Methylbenzyl)-1-Phenylethan-1-Amine (5ja)

GC-MS (m/z): Calcd. 225; Found 225.

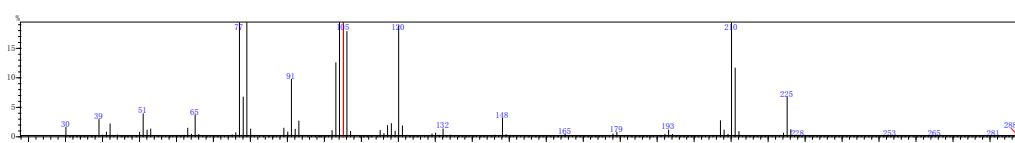

### 37. *N*-(2,4-Dimethylbenzyl)-1-Phenylethan-1-Amine (5ka)

Analytically pure product was isolated by a column chromatography on silica gel (hexanes/EtOAc = 50:1). Yellow liquid, Yield: 39.7 mg, 83%.  $^1\text{H NMR}$  (600 MHz,  $\text{CDCl}_3$ , 298 K):  $\delta$  = 7.53 (d,  $^3J_{\text{HH}}$  = 7.0 Hz, 2H, Ph), 7.48 (t,  $^3J_{\text{HH}}$  = 7.6 Hz, 2H, Ph), 7.39 (m, 1H, Ph), 7.29 (d,  $^3J_{\text{HH}}$  = 8.1 Hz, 1H, Ph), 7.11 (s, 2H, Ph), 3.98 (q,  $^3J_{\text{HH}}$  = 6.6 Hz, 1H, CH), 3.72 (t,  $^3J_{\text{HH}}$  = 13.1 Hz, 2H,  $\text{CH}_2$ ), 2.41 (d,  $^3J_{\text{HH}}$  = 30.3 Hz, 6H,  $\text{CH}_3$ ), 1.80 (s, 1H, NH), 1.52 (d,  $^3J_{\text{HH}}$  = 6.6 Hz, 3H,  $\text{CH}_3$ ).  $^{13}\text{C}\{^1\text{H}\}$  NMR (151 MHz,  $\text{CDCl}_3$ , 298 K):  $\delta$  = 145.9, 136.5, 136.4, 135.7, 131.2, 128.8, 128.5 (2C), 127.0, 126.8 (2C), 126.6, 58.2, 49.5, 24.7, 21.1, 18.9.

GC-MS (m/z): Calcd. 239; Found 239.

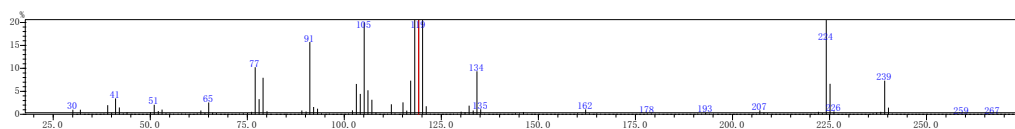

### 38. *N*-(Furan-2-ylmethyl)-1-Phenylethan-1-Amine (5la)

GC-MS (m/z): Calcd. 201; Found 201.

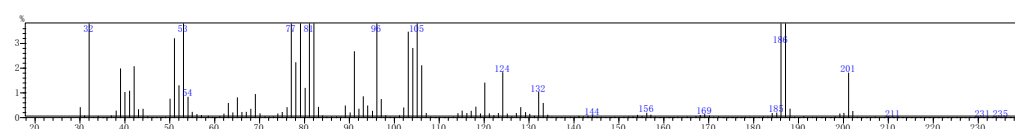

### 39. *N*-Ethyl-1-Phenylethan-1-Amine (5ma)

GC-MS (m/z): Calcd. 149; Found 149.

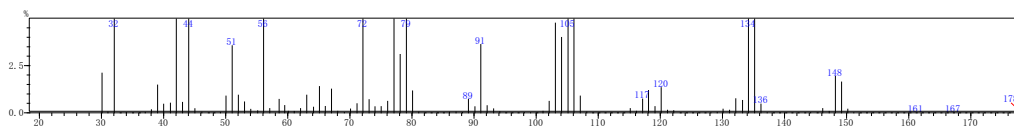

#### 40. *N*-(Cyclohexylmethyl)-1-Phenylethan-1-Amine (5na)

GC-MS (m/z): Calcd. 217; Found 217.

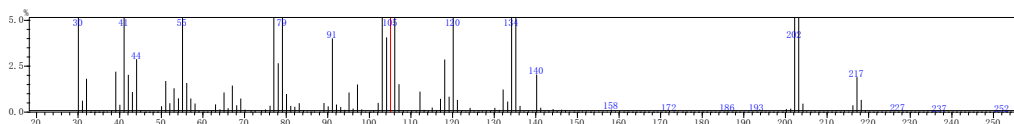

#### 41. *N*-Benzyl-1-(4-Methoxyphenyl)-Ethan-1-Amine (5ab)

Analytically pure product was isolated by a column chromatography on silica gel (hexanes/EtOAc = 50:1). Yellow liquid, Yield: 30.4 mg, 63%.  $^1\text{H NMR}$  (600 MHz,  $\text{CDCl}_3$ , 298 K):  $\delta$  = 7.91 (dt,  $^3J_{\text{HH}}$  = 8.8, 2.8 Hz, 3H, Ph), 7.18 (dt,  $^3J_{\text{HH}}$  = 8.7, 2.8 Hz, 2H, Ph), 6.91 (dt,  $^3J_{\text{HH}}$  = 8.9, 2.4 Hz, 2H, Ph), 6.84 (dt,  $^3J_{\text{HH}}$  = 8.7, 2.8 Hz, 2H, Ph), 3.85 (s, 1H, CH), 3.78 (s, 4H,  $\text{CH}_3$ , CH), 1.64 (s, 1H, NH), 1.30 (d,  $^3J_{\text{HH}}$  = 7.2 Hz, 3H,  $\text{CH}_3$ ).  $^{13}\text{C}\{^1\text{H}\}$  NMR (151 MHz,  $\text{CDCl}_3$ , 298 K):  $\delta$  = 197.8, 163.3, 157.9, 138.8, 130.3 (2C), 127.7 (2C), 113.8 (2C), 113.6 (2C), 55.4, 46.8, 35.0, 21.8.

GC-MS (m/z): Calcd. 241; Found 241.

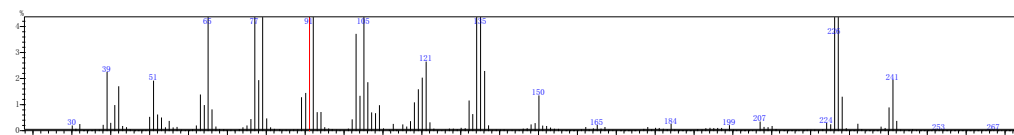

#### 42. *N*-Benzyl-1-(*p*-Tolyl)-Ethan-1-Amine (5ac)

GC-MS (m/z): Calcd. 225; Found 225.

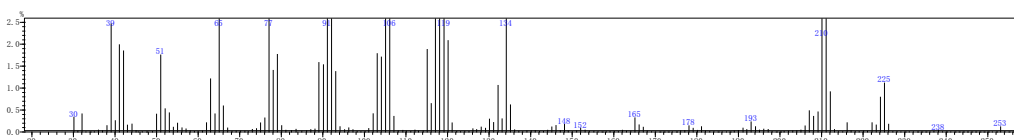

#### 43. *N*-Benzyl-1-(4-Chlorophenyl) Ethan-1-Amine (5ai)

GC-MS (m/z): Calcd. 245; Found 245.

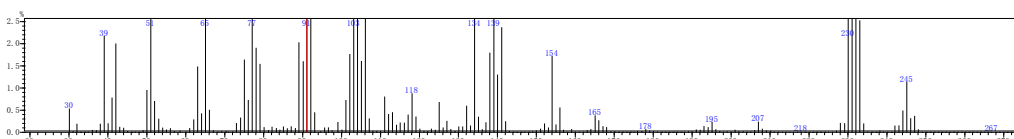

#### 44. *N*-Benzyl-1-(4-(Trifluoromethyl) Phenyl) Ethan-1-Amine (5ae)



GC-MS (m/z): Calcd. 279; Found 279.

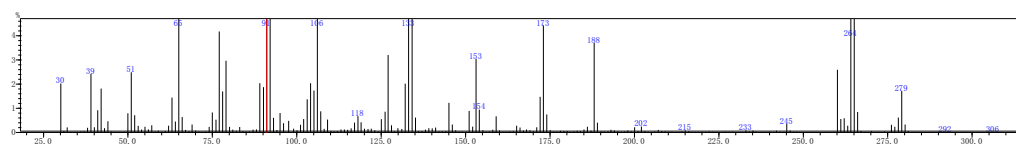

#### 45. *N*-Benzyl-1-Phenylpropan-1-Amine (5af)

GC-MS (m/z): Calcd. 225; Found 224.

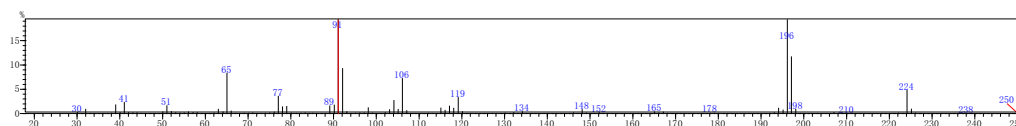

#### 46. *N*-Benzylpropan-2-Amine (5ag)

GC-MS (m/z): Calcd. 149; Found 149.

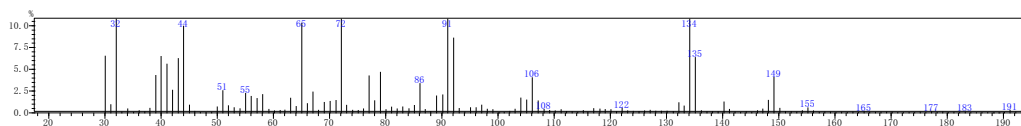

#### 47. *N*-benzylcyclohexanamine (5ah)

GC-MS (m/z): Calcd. 189; Found 189.

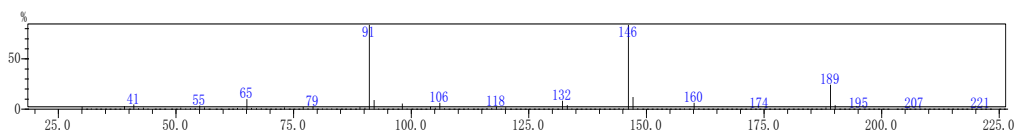

## 7. References

- (1) L. Piche, J. C. Daigle, R. Poli and J. P. Claverie, *Eur. J. Inorg. Chem.* 2010, **2010**, 4595–4601.
- (2) B. Sundararaju, Z. Tang, M. Achard, G. V. M. Sharma, L. Toupet and C. Bruneau, *Adv. Synth. Catal.*, 2010, **352**, 3141–3146.
- (3) J. D. Grayson, F. M. Dennis, C. C. Robertson and B. M. Partridge, *J. Org. Chem.*, 2021, **86**, 9883–9897.
- (4) Y. J. Su, M. Lu, B. L. Dong, H. Chen and X. D. Shi, *Adv. Synth. Catal.*, 2014, **356**, 692-696.

## 8. NMR Spectra

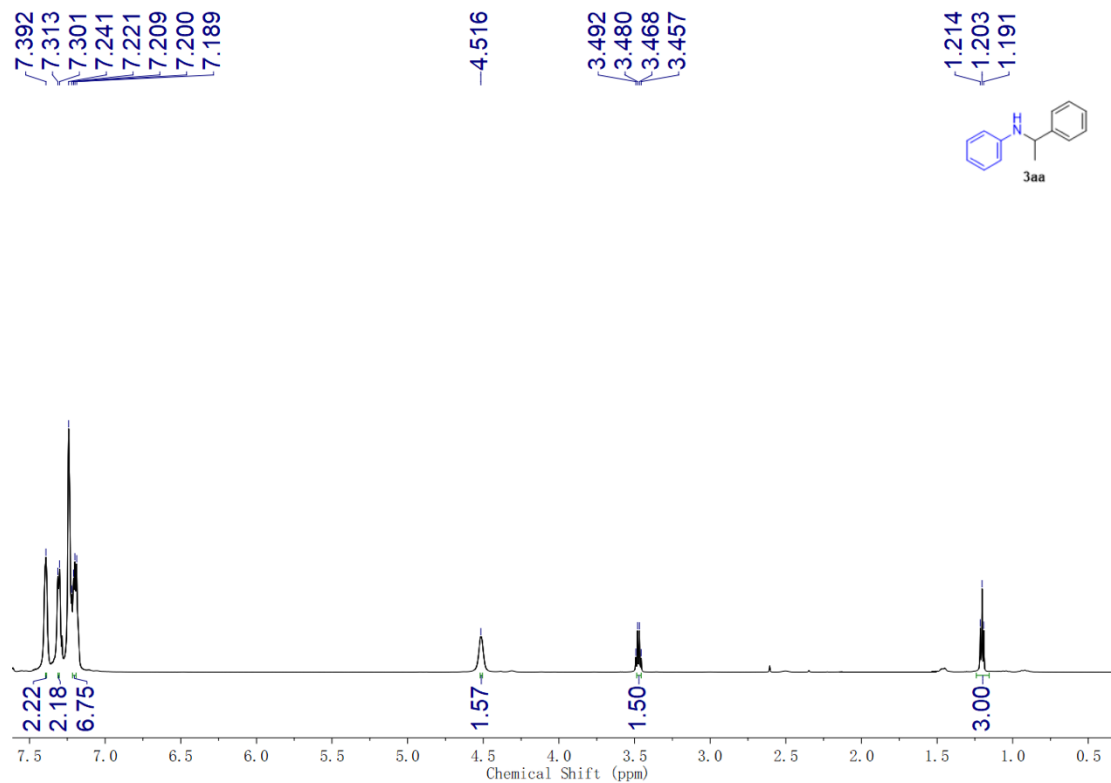

$^1\text{H}$  NMR (600 MHz, 298K,  $\text{CDCl}_3$ ) of **3aa**

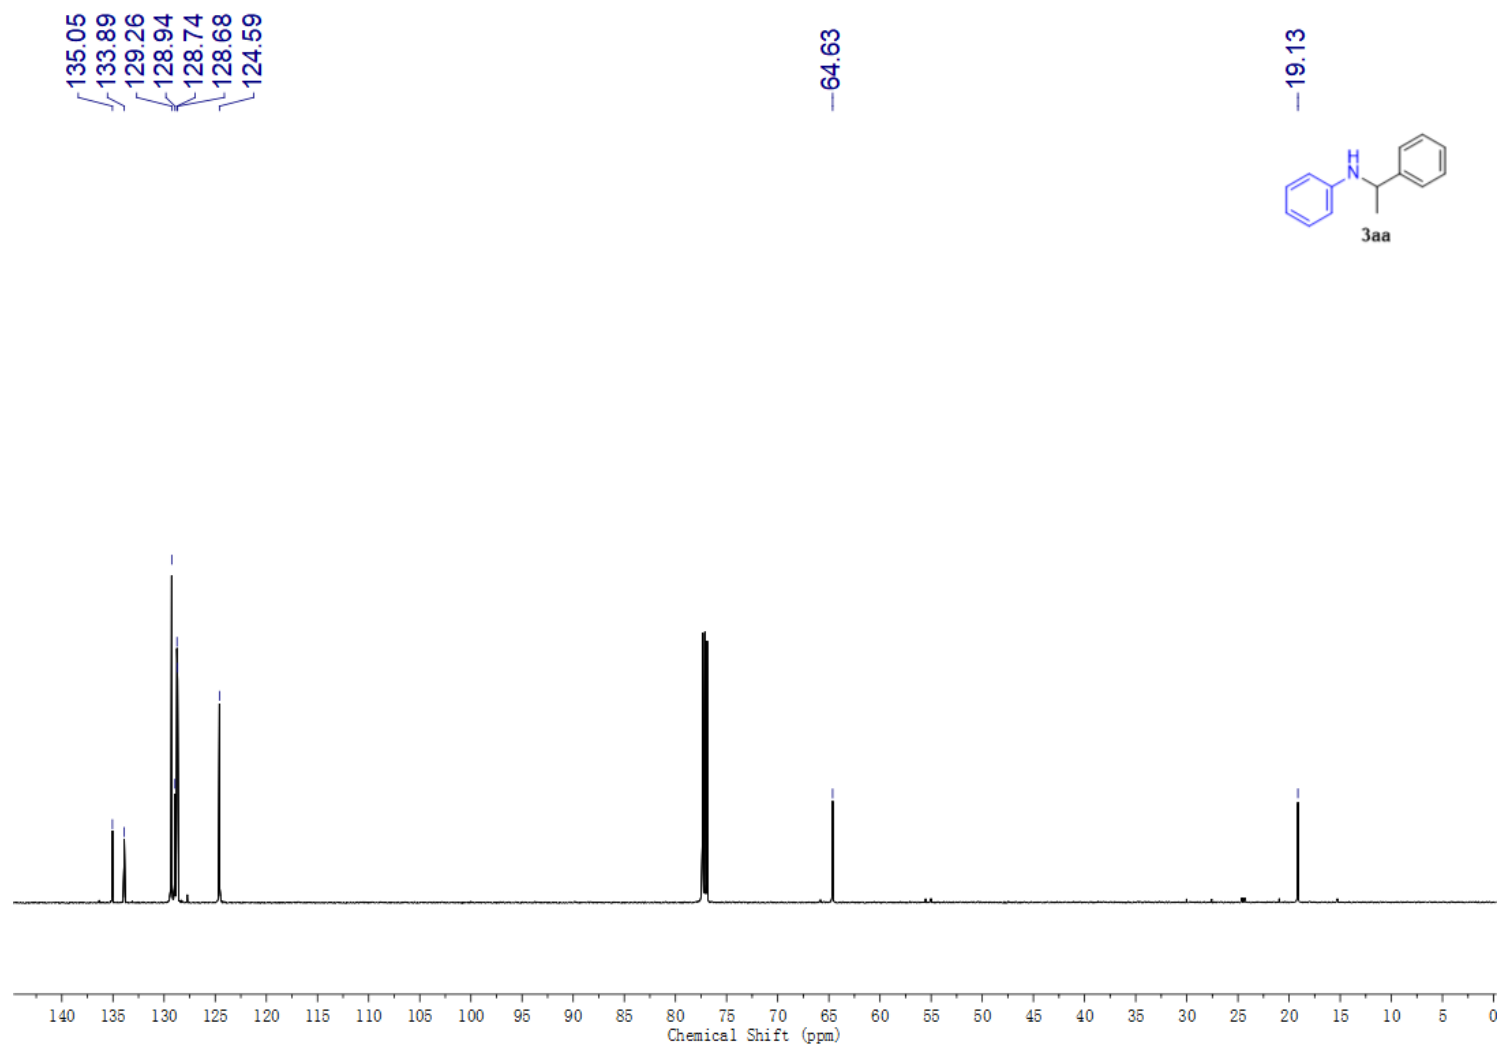

$^{13}\text{C}$  NMR (151 MHz, 298 K,  $\text{CDCl}_3$ ) of 3aa

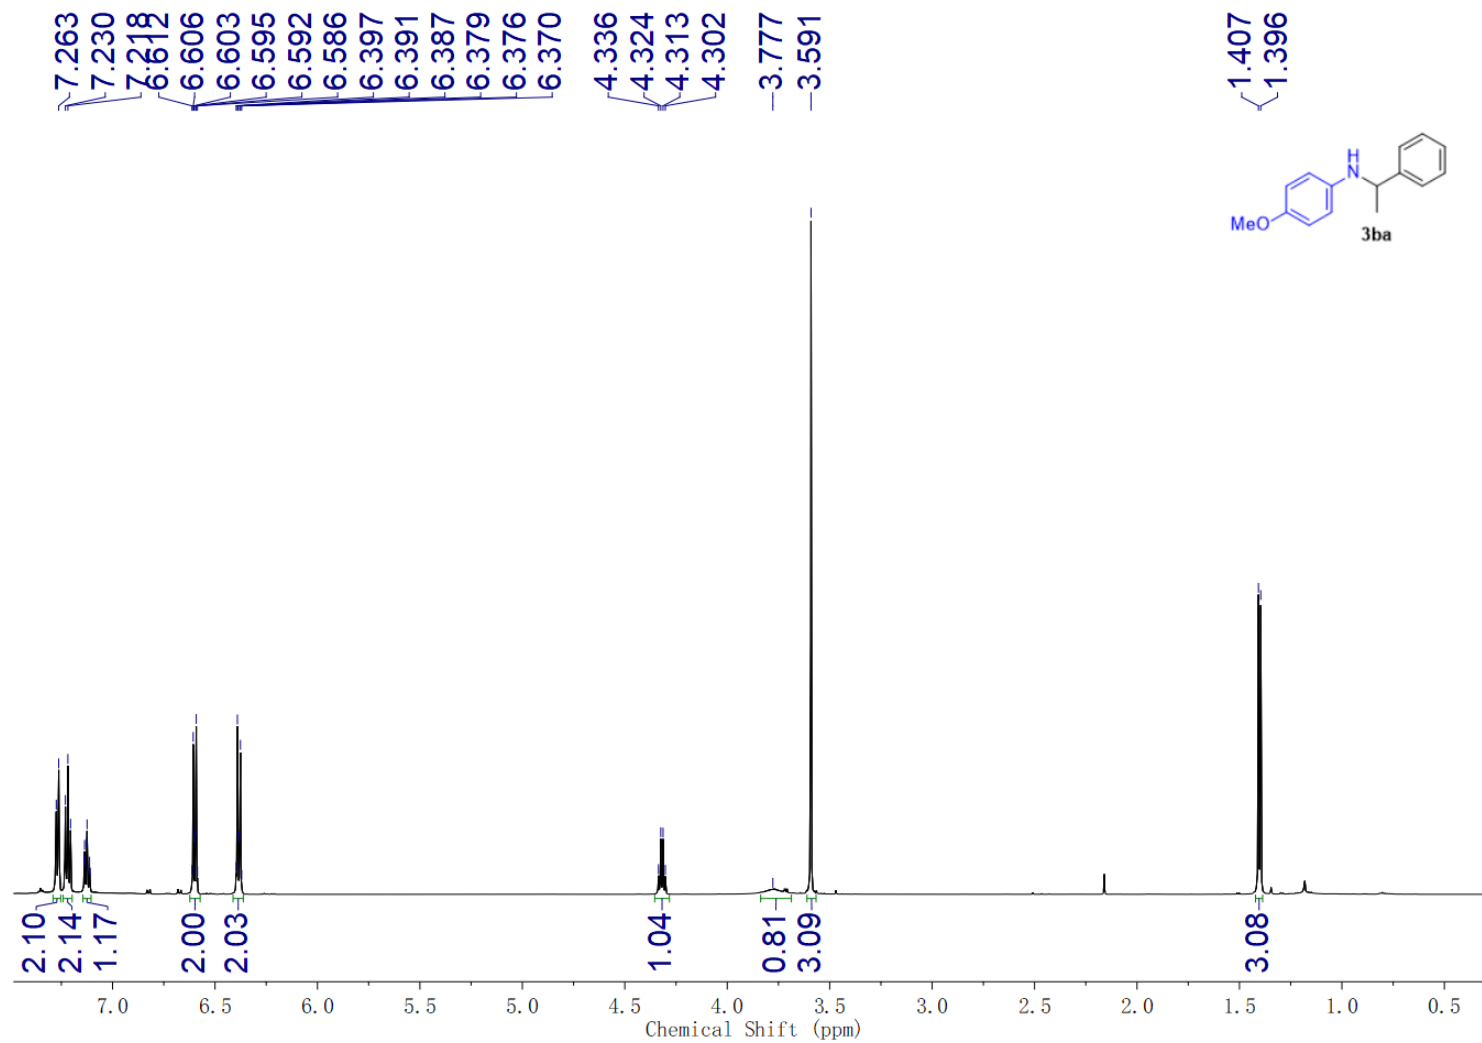

$^1\text{H}$  NMR (600 MHz, 298K,  $\text{CDCl}_3$ ) of **3ba**

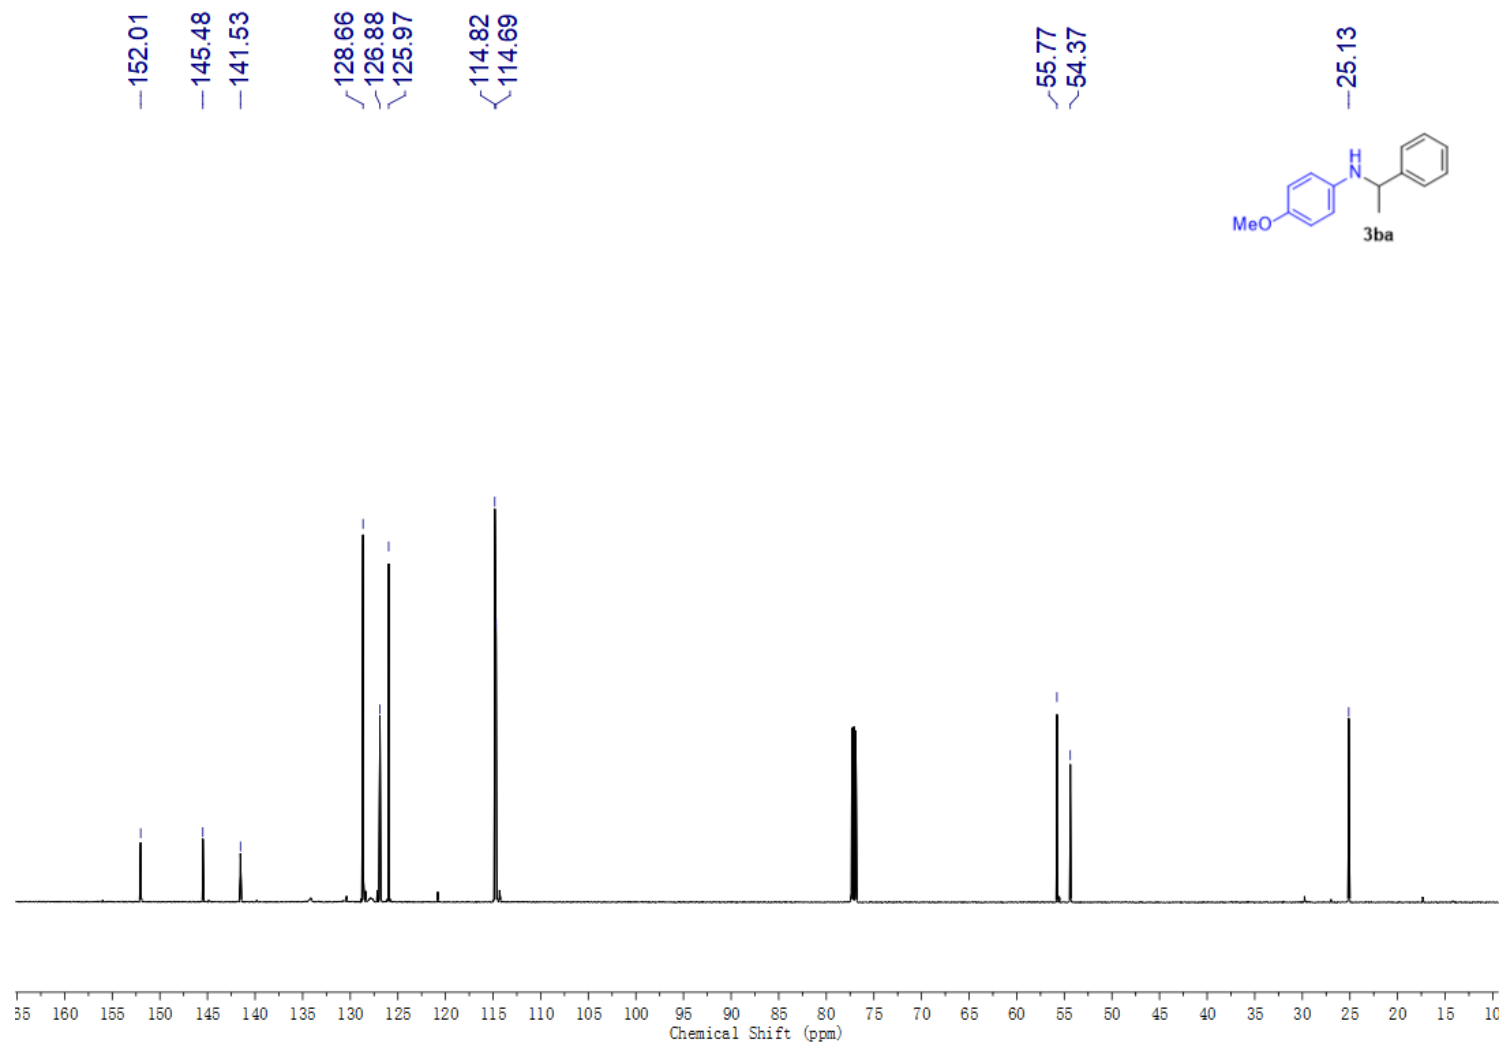

$^{13}\text{C}$  NMR (151 MHz, 298 K,  $\text{CDCl}_3$ ) of **3ba**

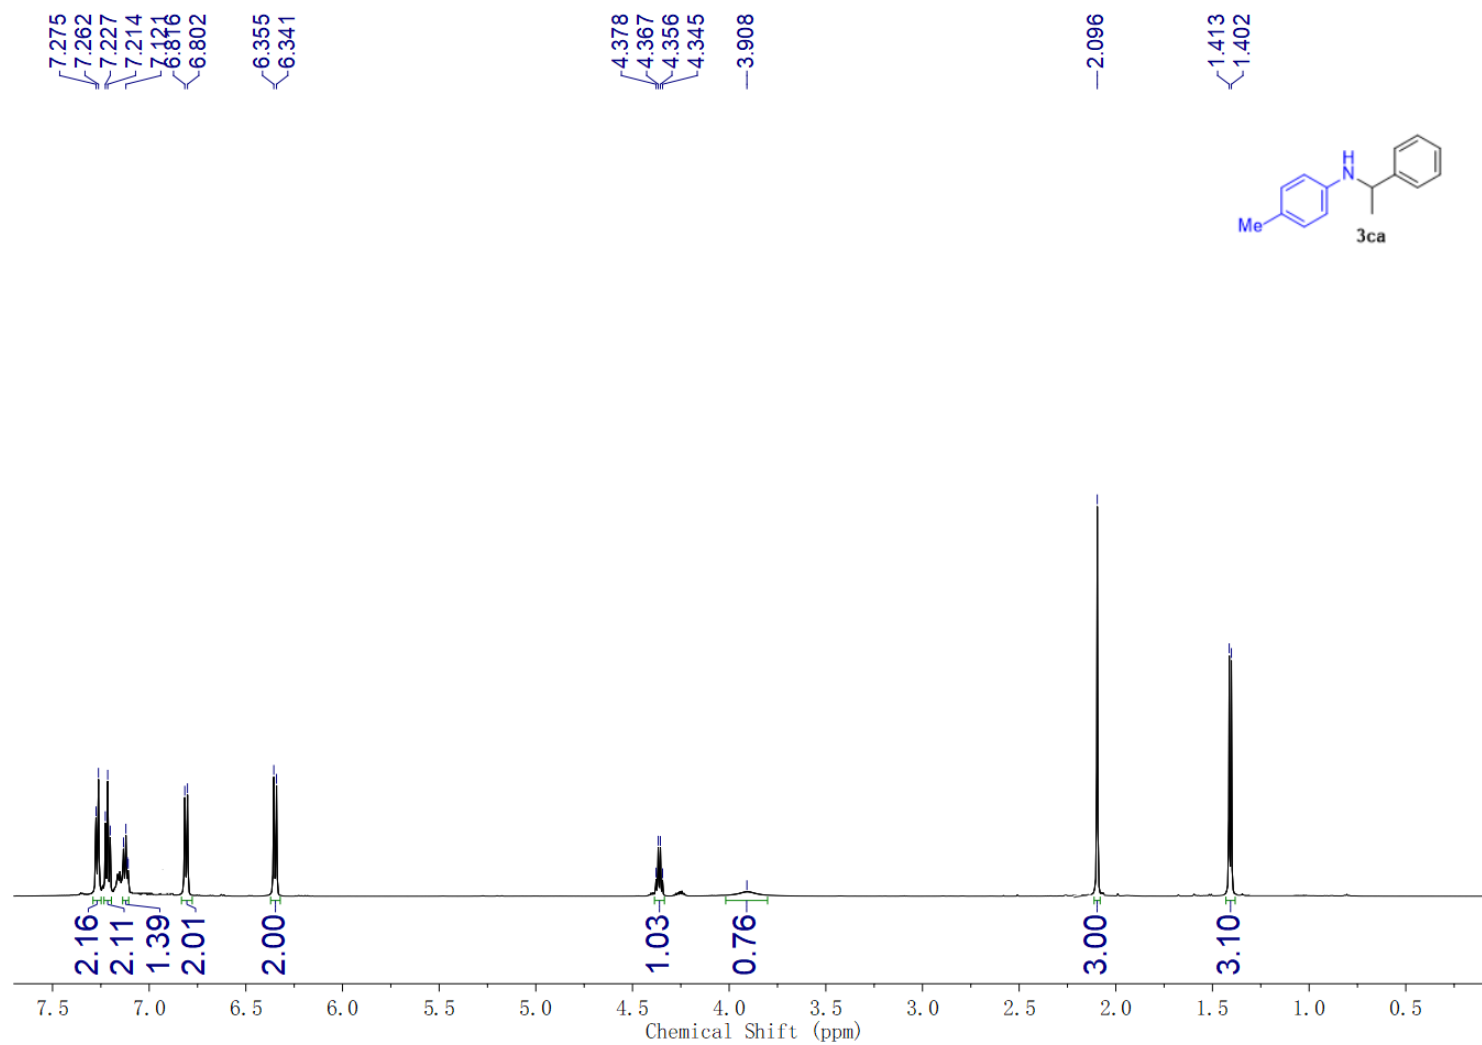

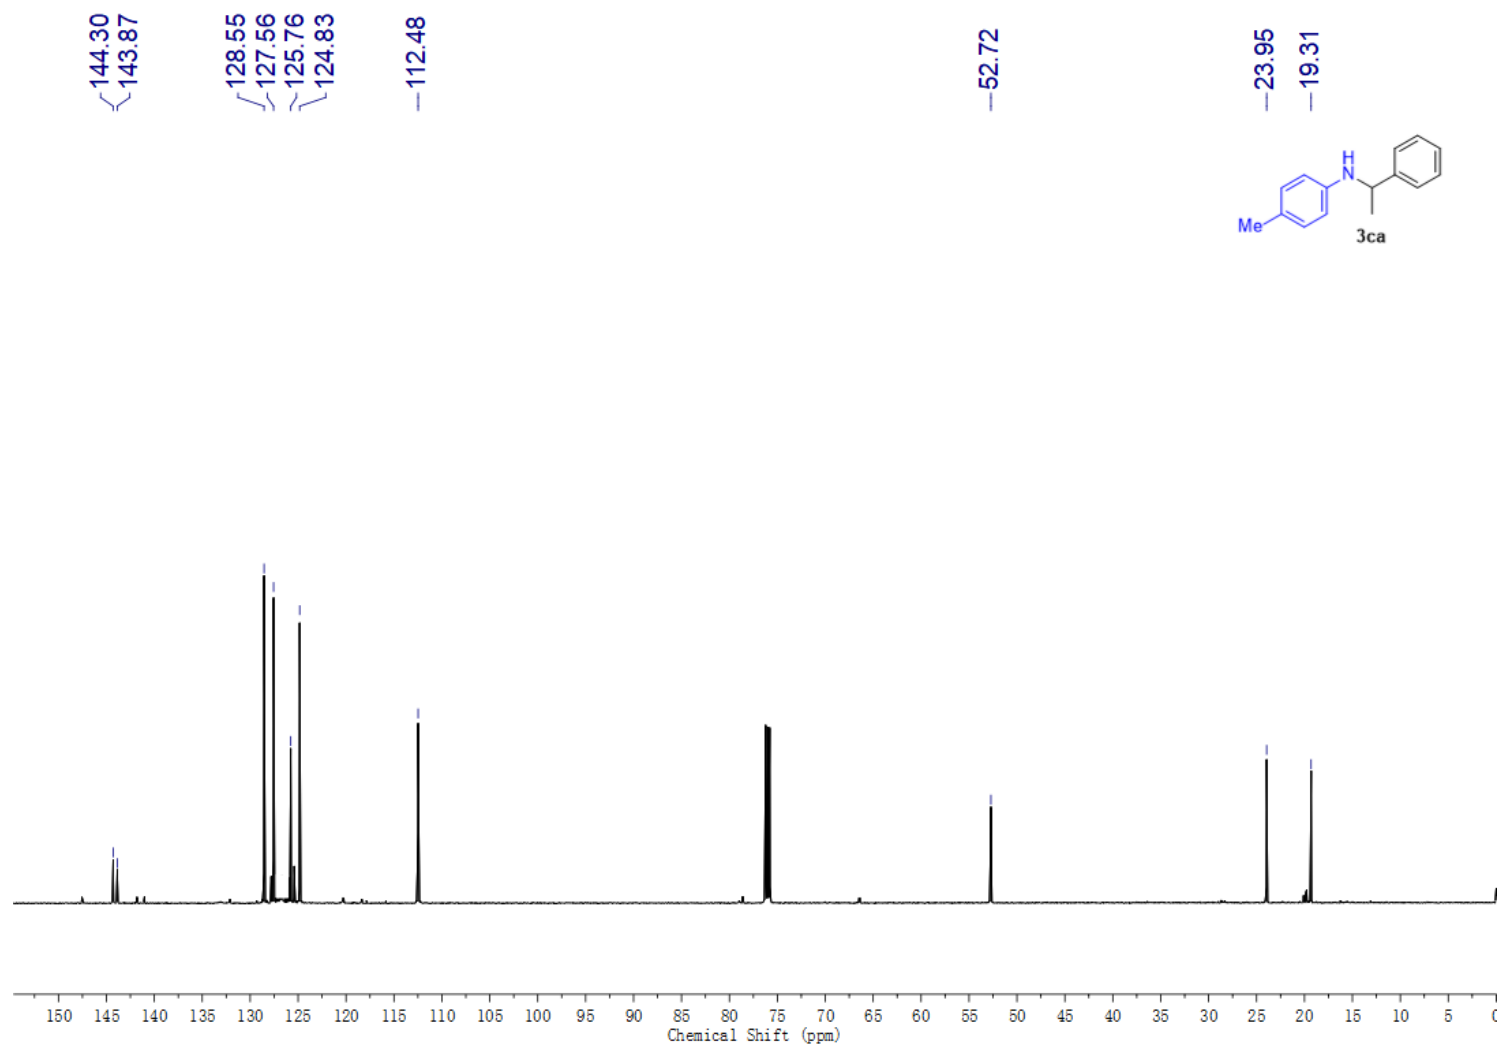

<sup>13</sup>C NMR (151 MHz, 298 K, CDCl<sub>3</sub>) of **3ca**



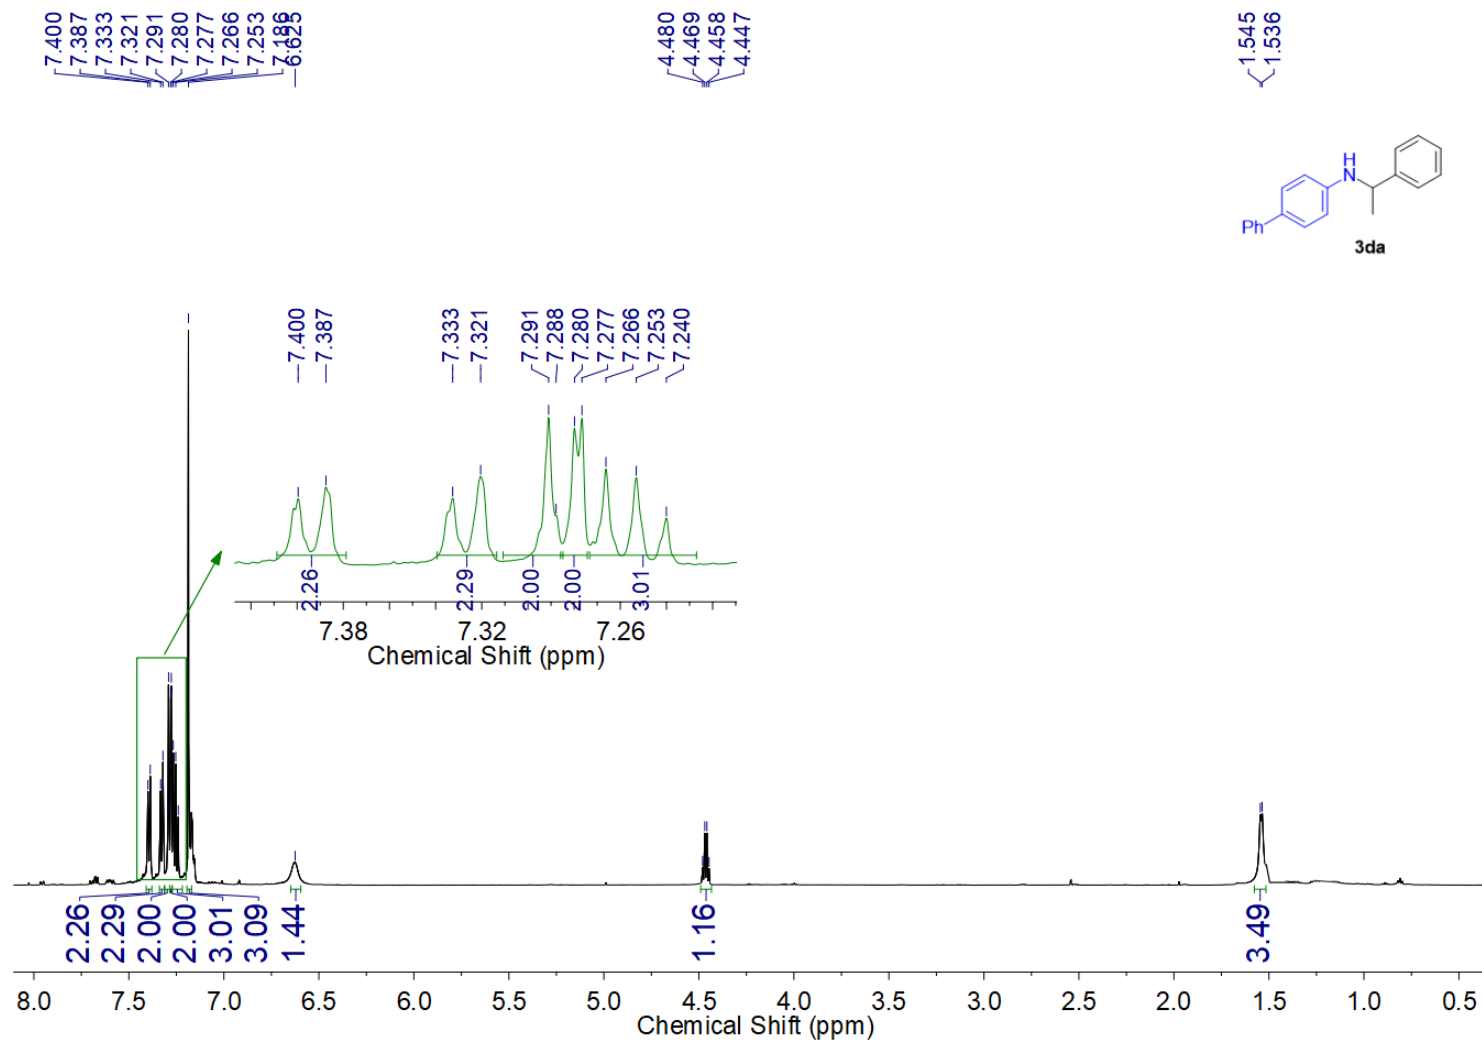

$^1\text{H}$  NMR (600 MHz, 298K,  $\text{CDCl}_3$ ) of **3da**

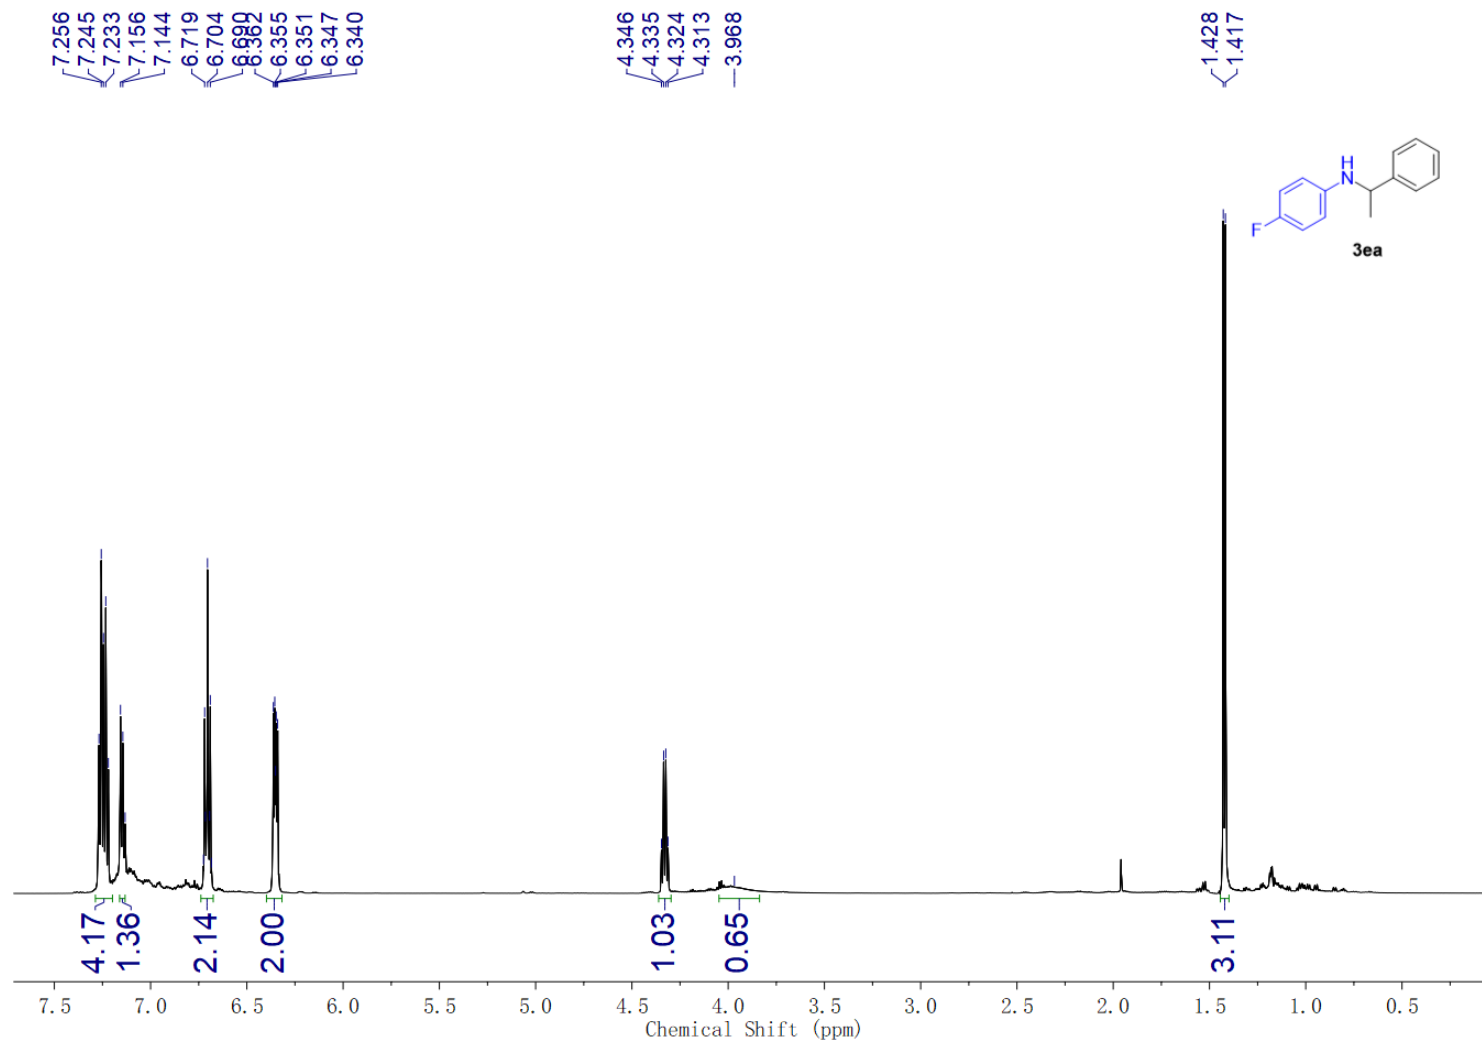

$^1\text{H}$  NMR (600 MHz, 298K,  $\text{CDCl}_3$ ) of **3ea**

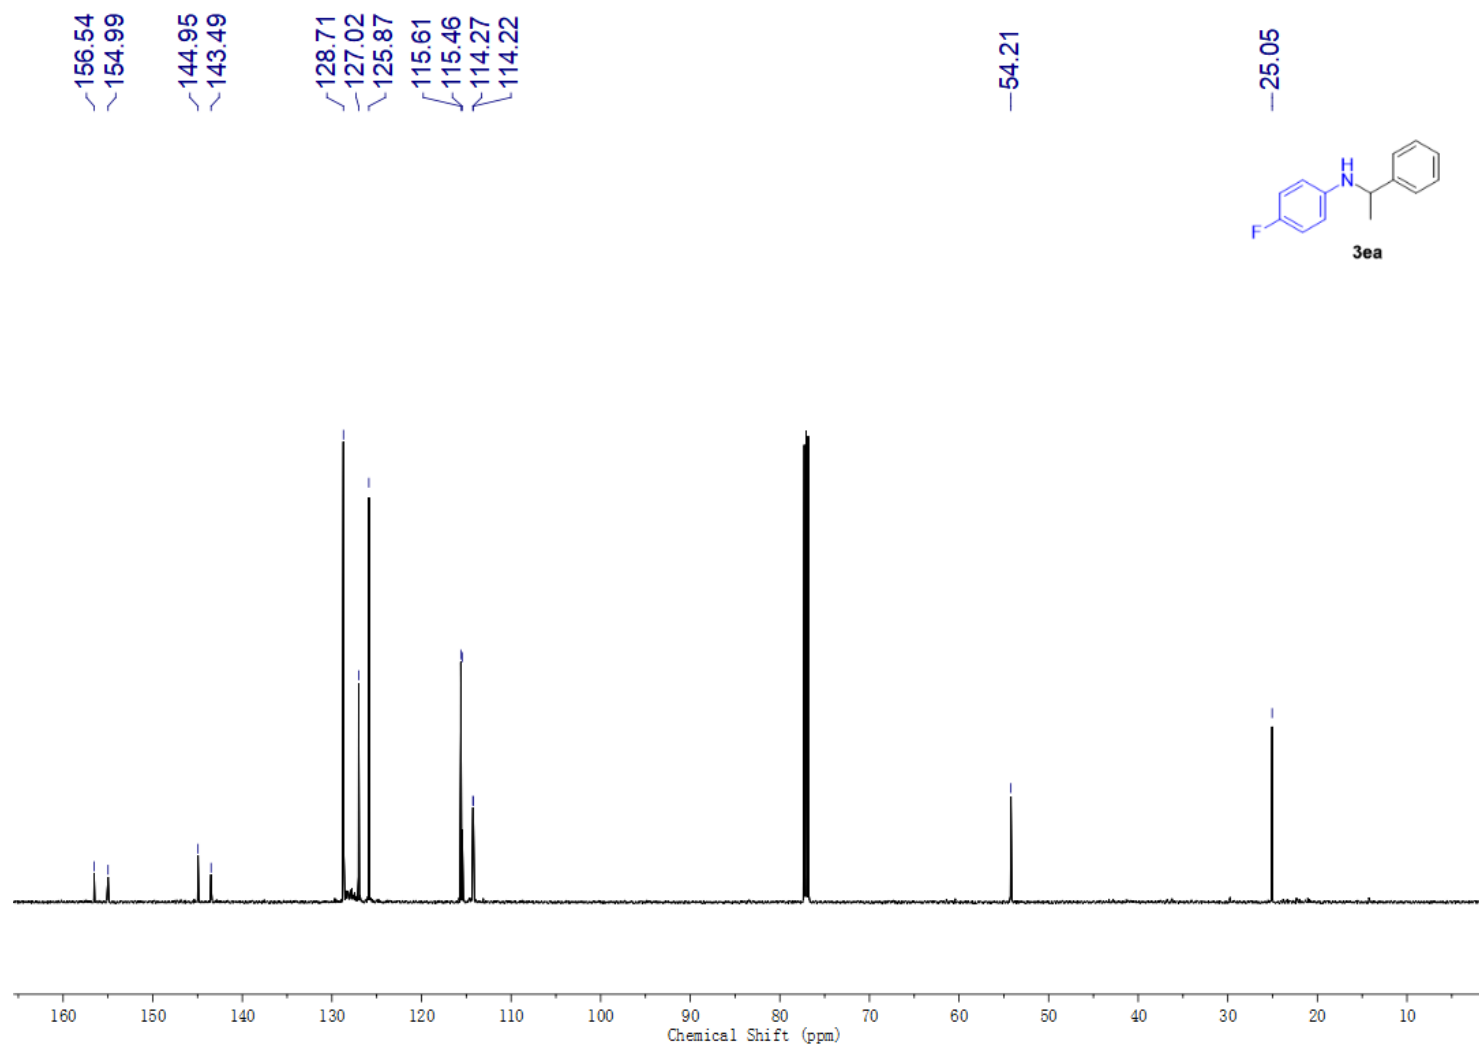

$^{13}\text{C}$  NMR (151 MHz, 298 K,  $\text{CDCl}_3$ ) of **3ea**

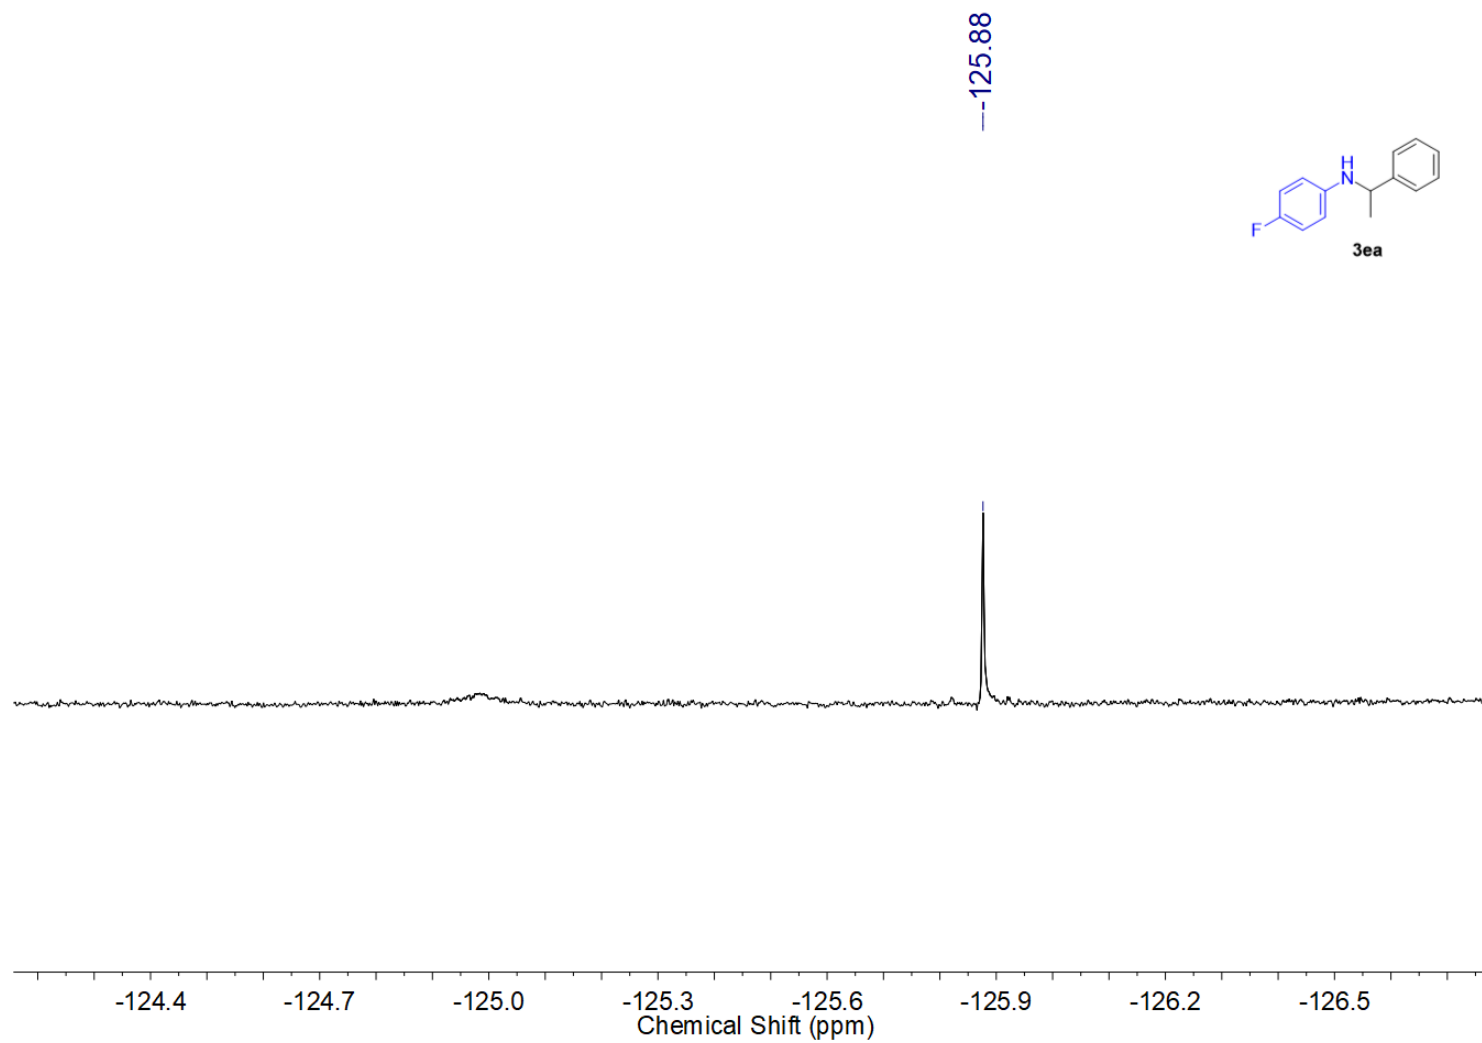

$^{19}\text{F}$  NMR (564 MHz, 298 K,  $\text{CDCl}_3$ ) of **3ea**

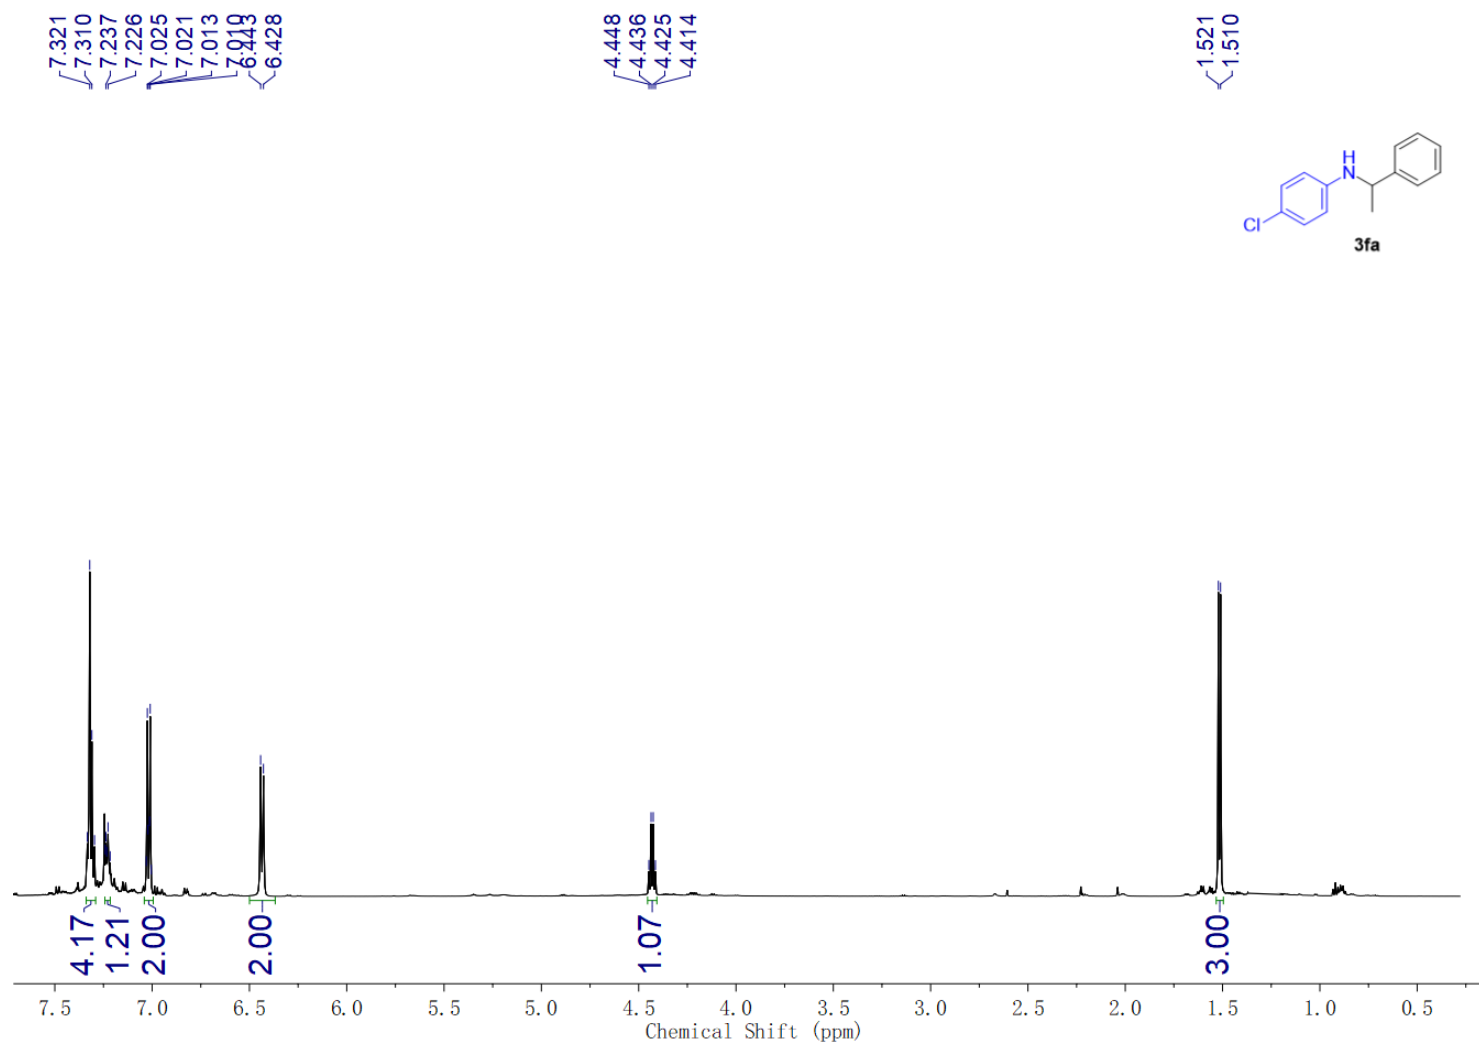

<sup>1</sup>H NMR (600 MHz, 298K, CDCl<sub>3</sub>) of **3fa**

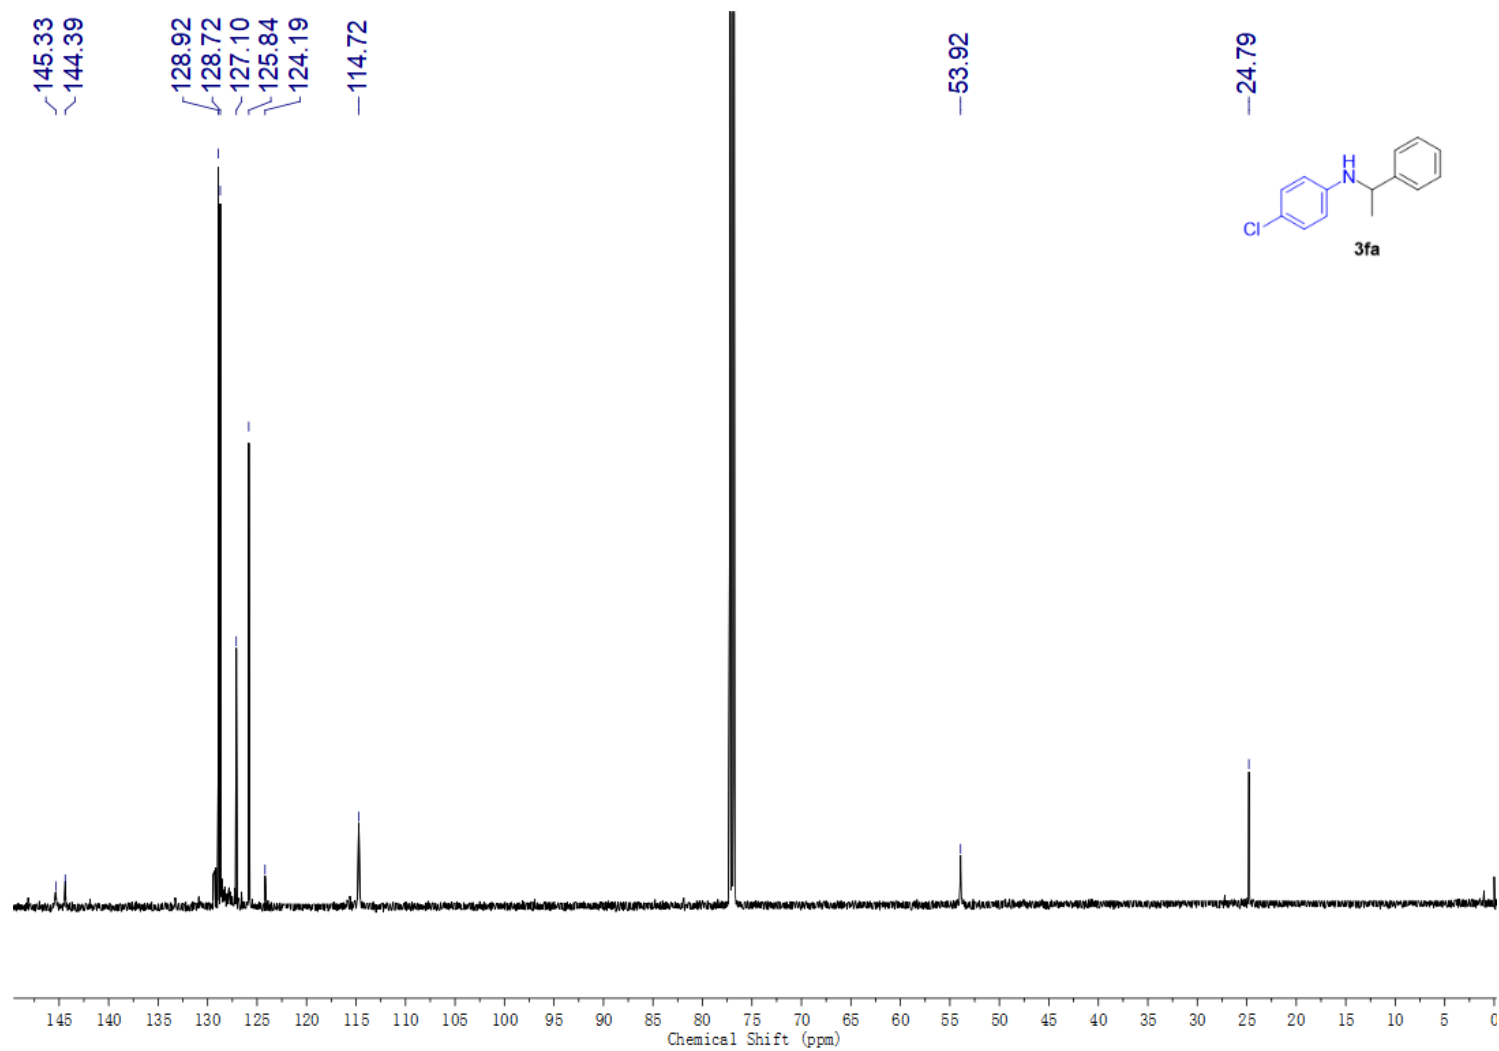

$^{13}\text{C}$  NMR (151 MHz, 298 K,  $\text{CDCl}_3$ ) of **3fa**

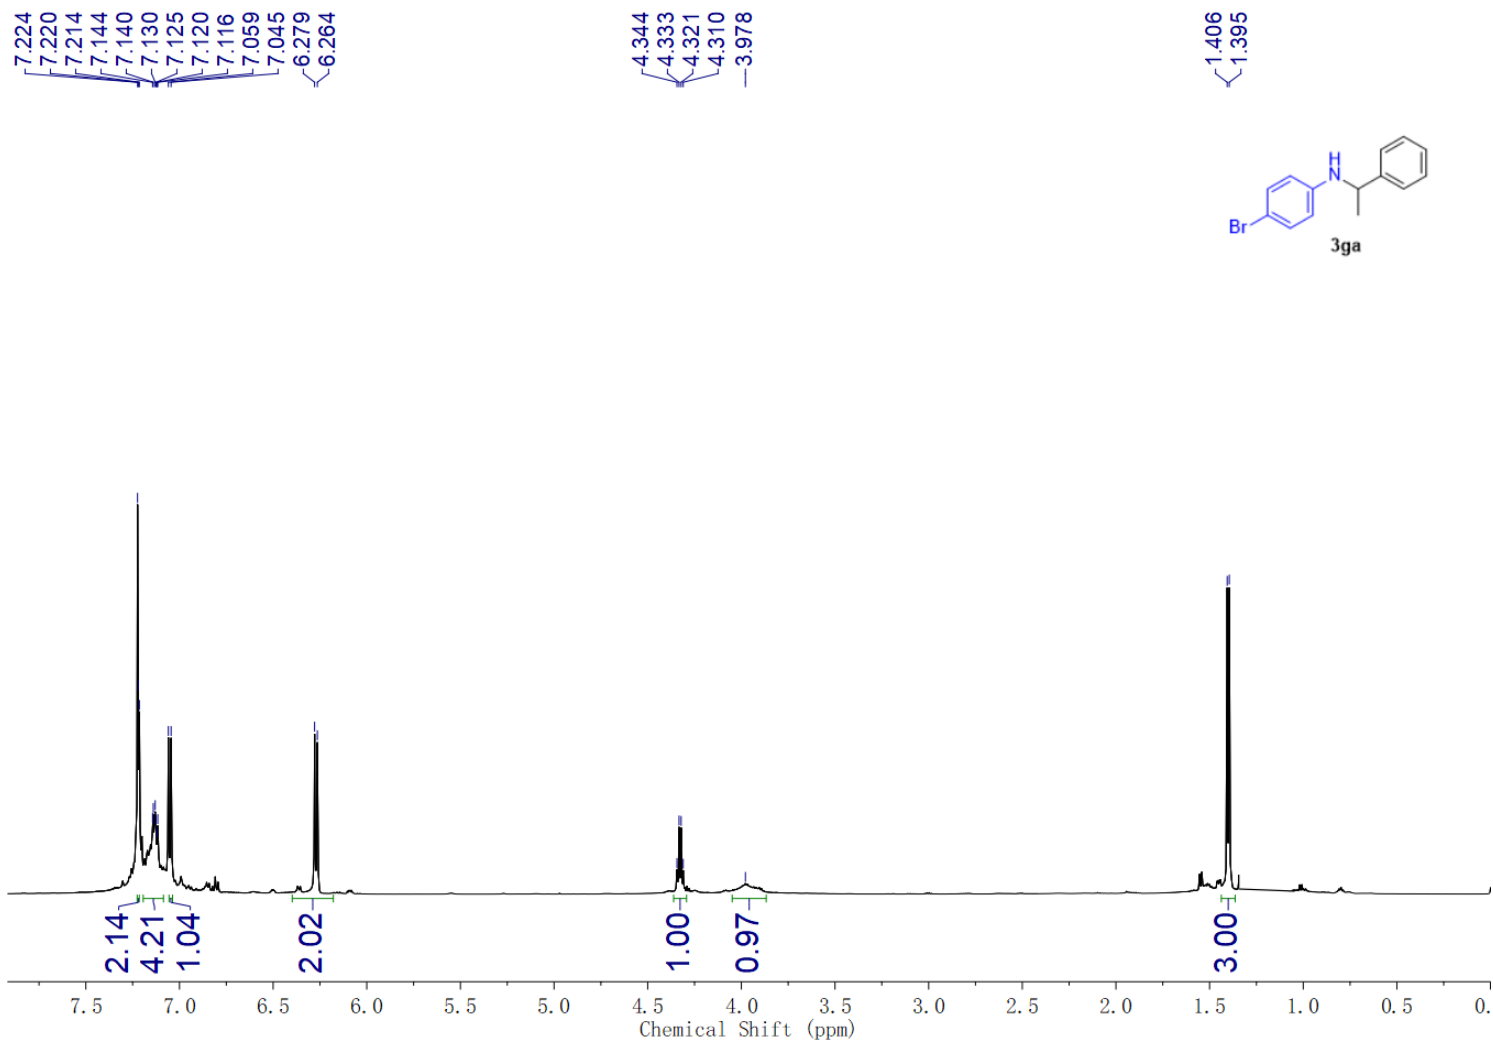

$^1\text{H}$  NMR (600 MHz, 298K,  $\text{CDCl}_3$ ) of **3ga**

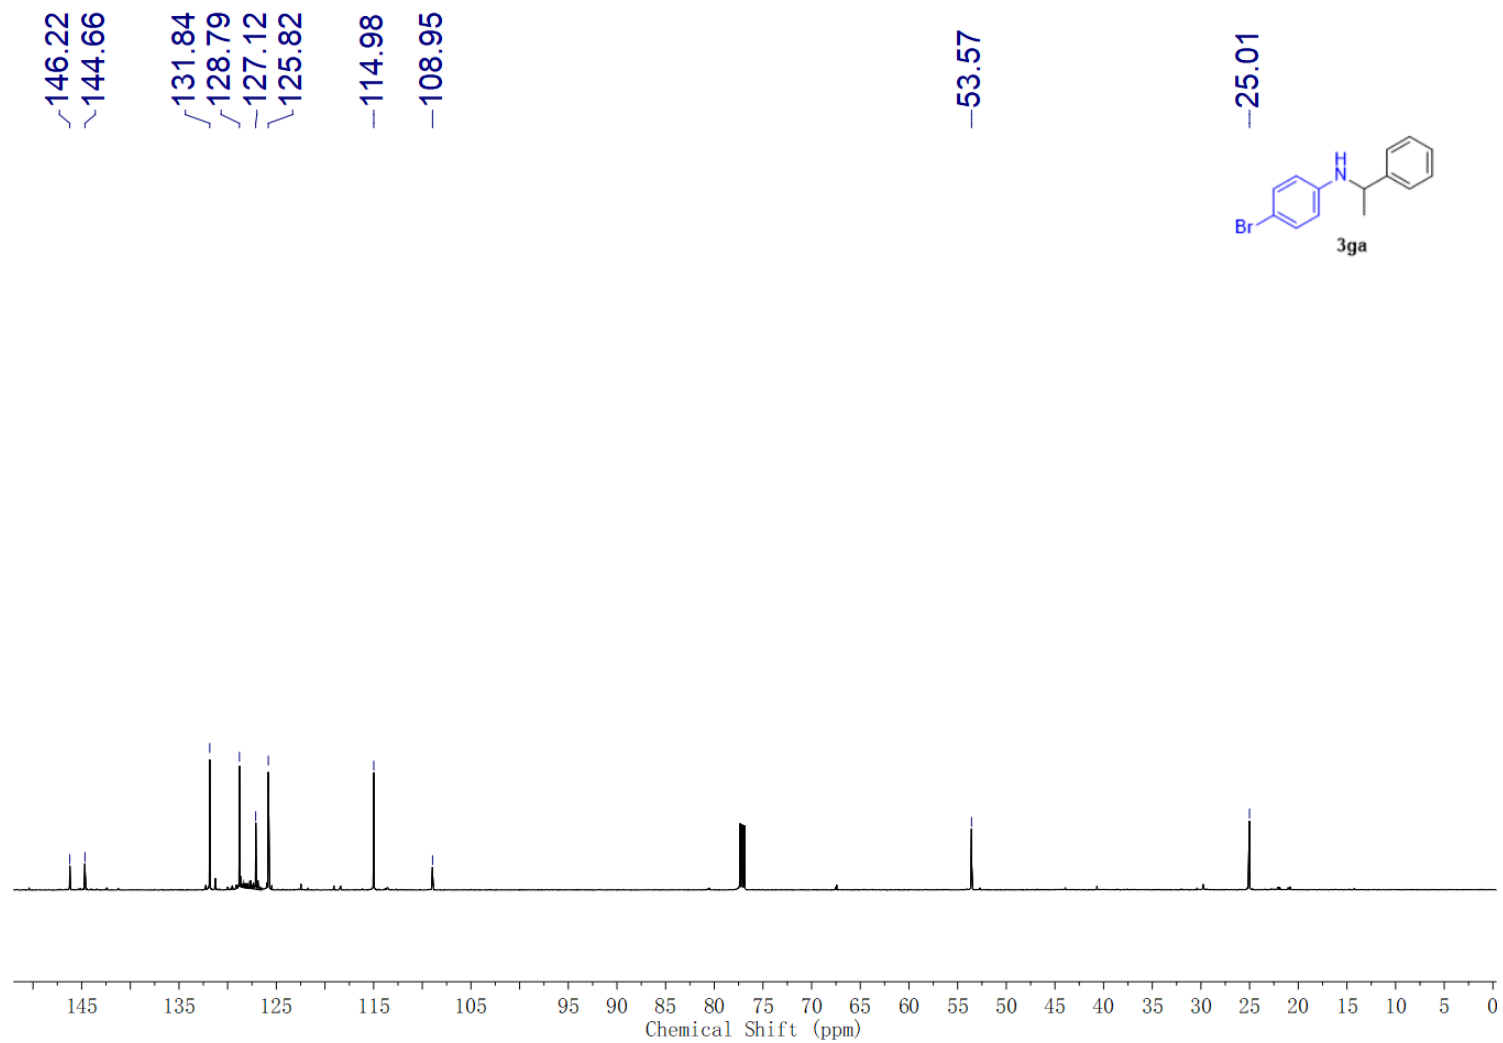

$^{13}\text{C}$  NMR (151 MHz, 298 K,  $\text{CDCl}_3$ ) of **3ga**



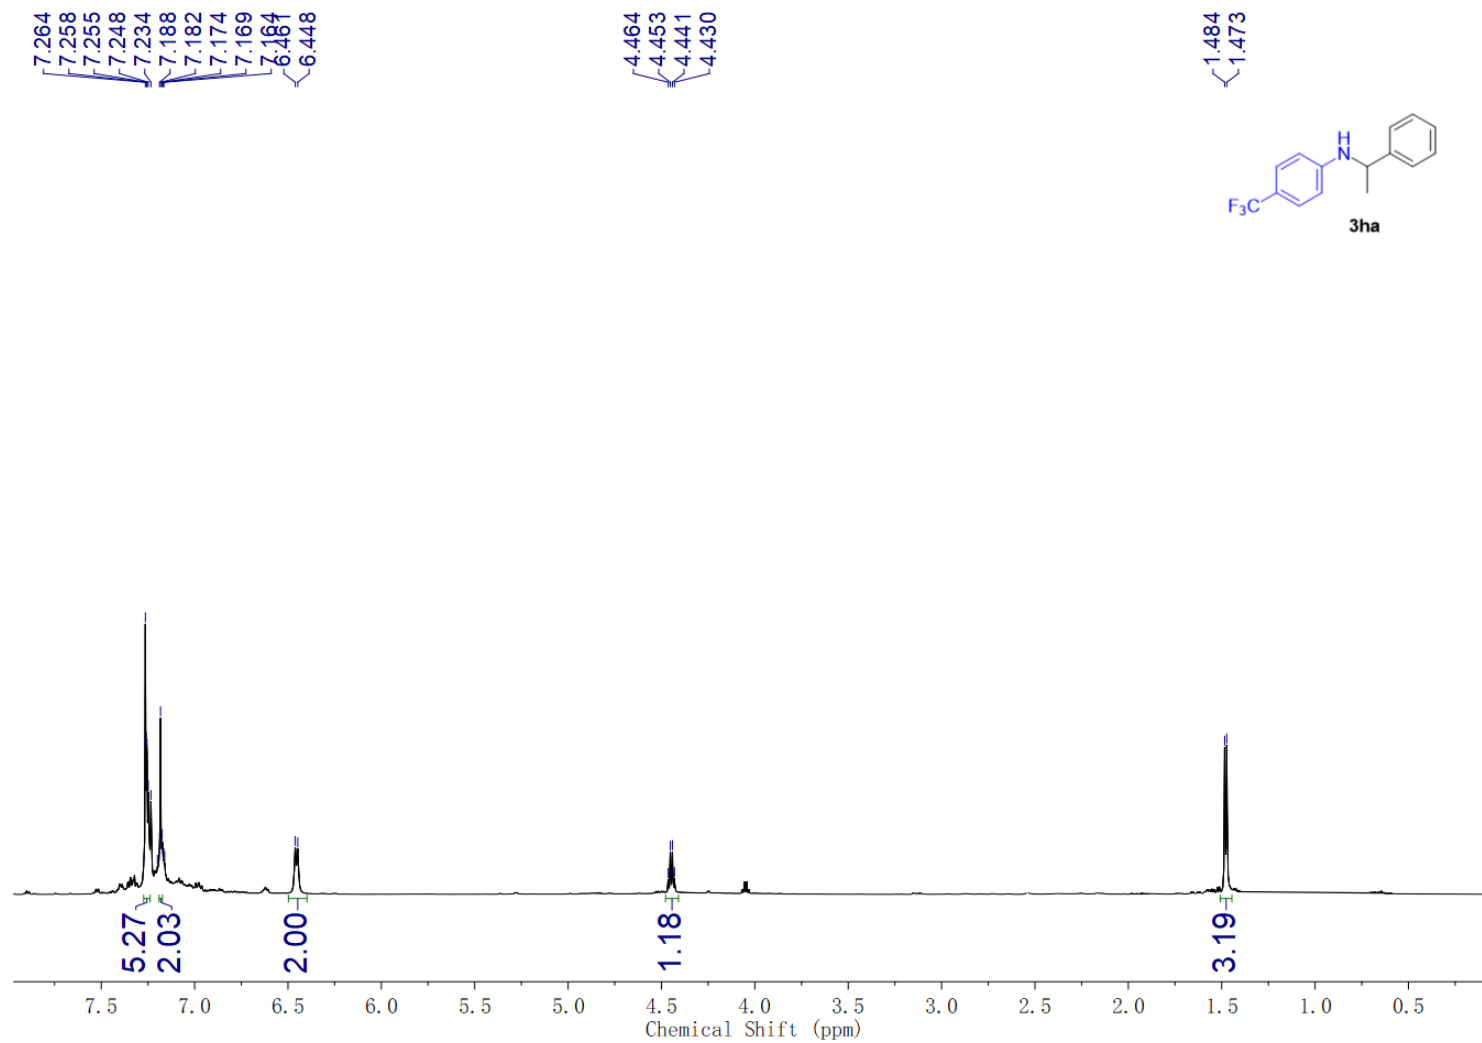

$^1\text{H}$  NMR (600 MHz, 298K,  $\text{CDCl}_3$ ) of **3ha**

--61.13

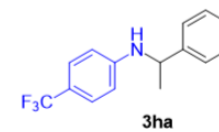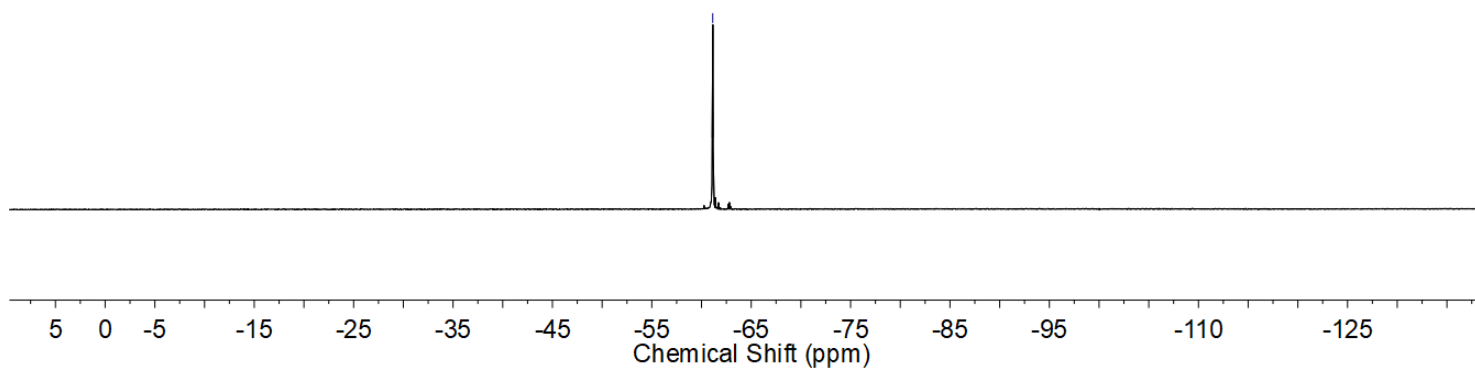

<sup>19</sup>F NMR (564 MHz, 298 K, CDCl<sub>3</sub>) of **3ha**

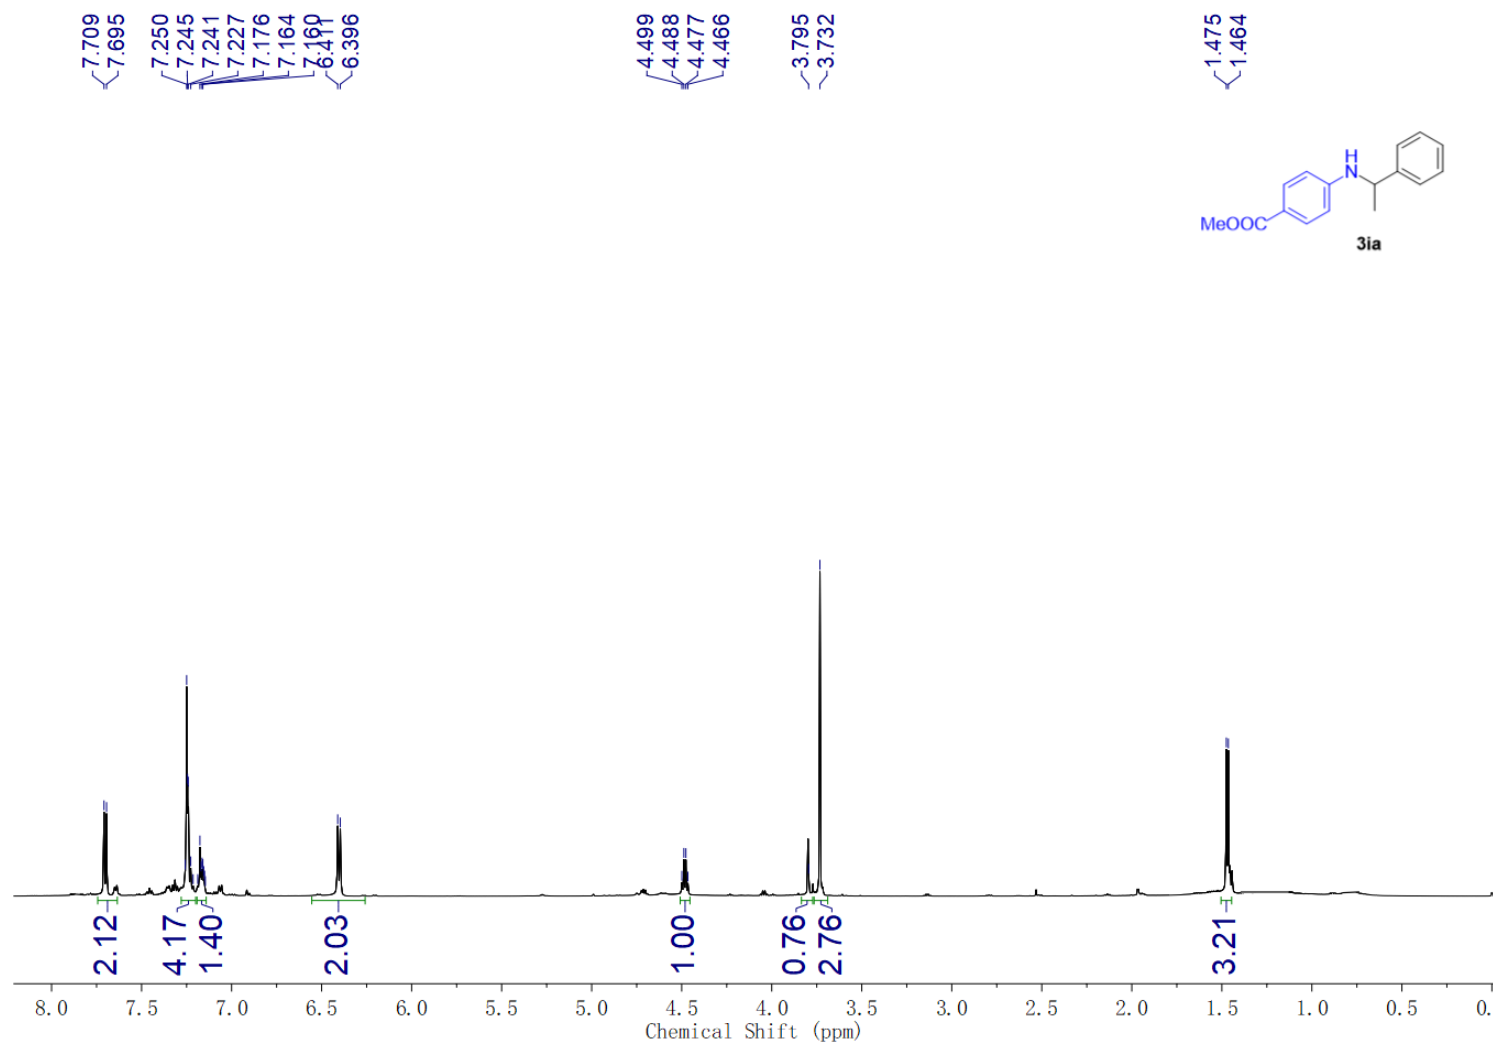

<sup>1</sup>H NMR (600 MHz, 298K, CDCl<sub>3</sub>) of **3ia**

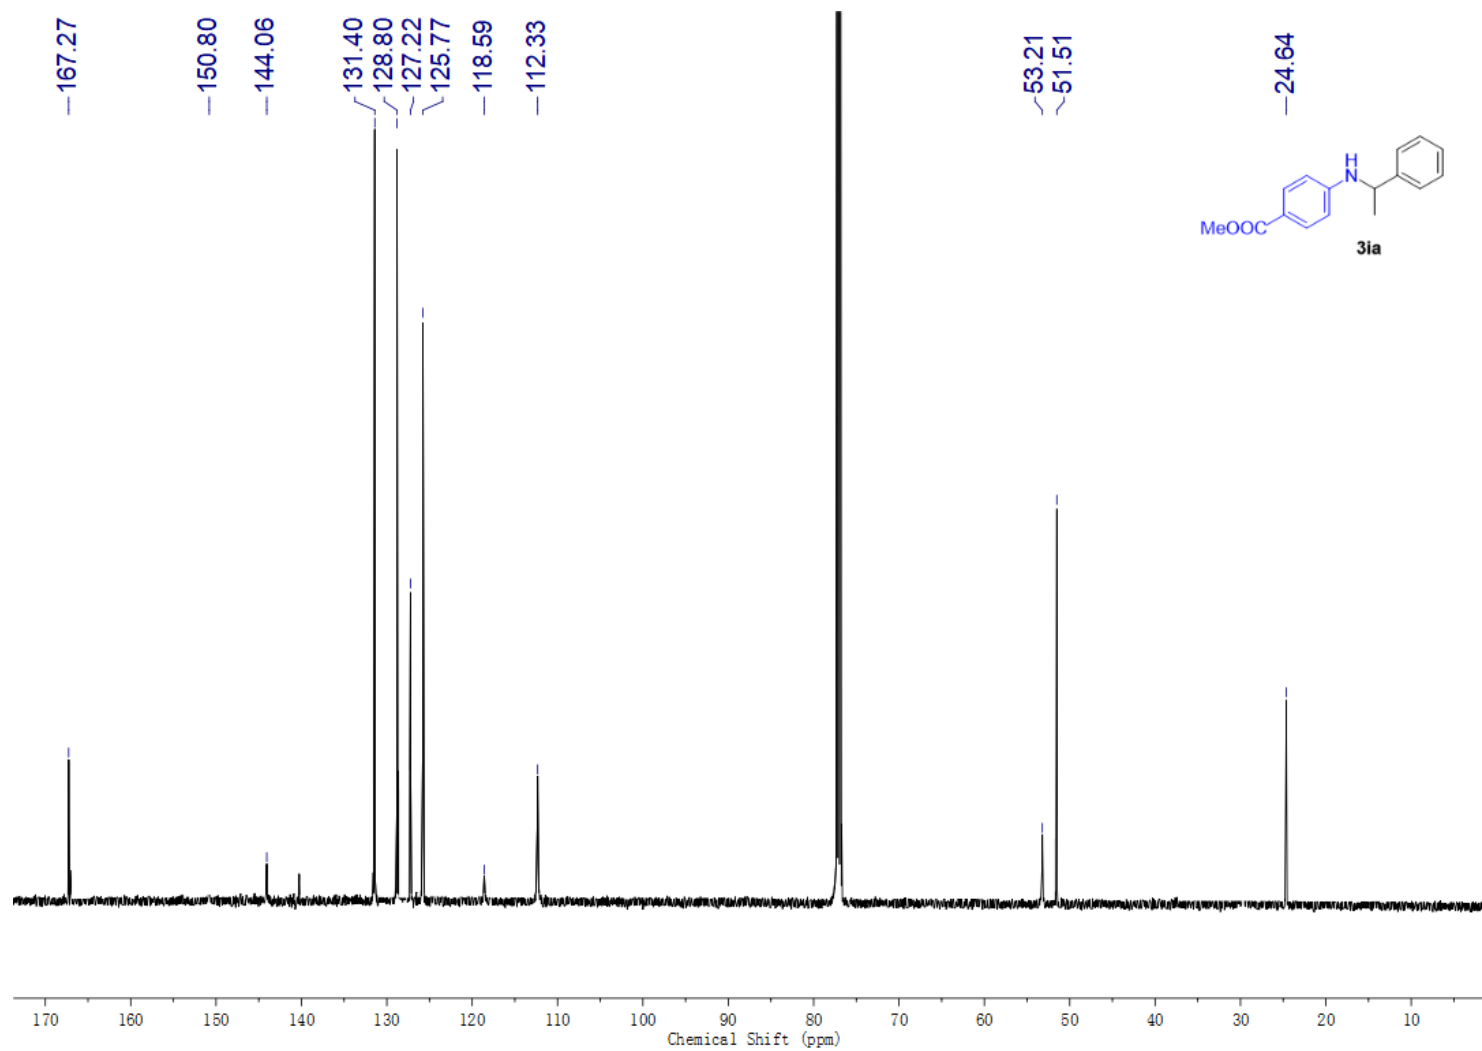

$^{13}\text{C}$  NMR (151 MHz, 298 K,  $\text{CDCl}_3$ ) of **3ia**

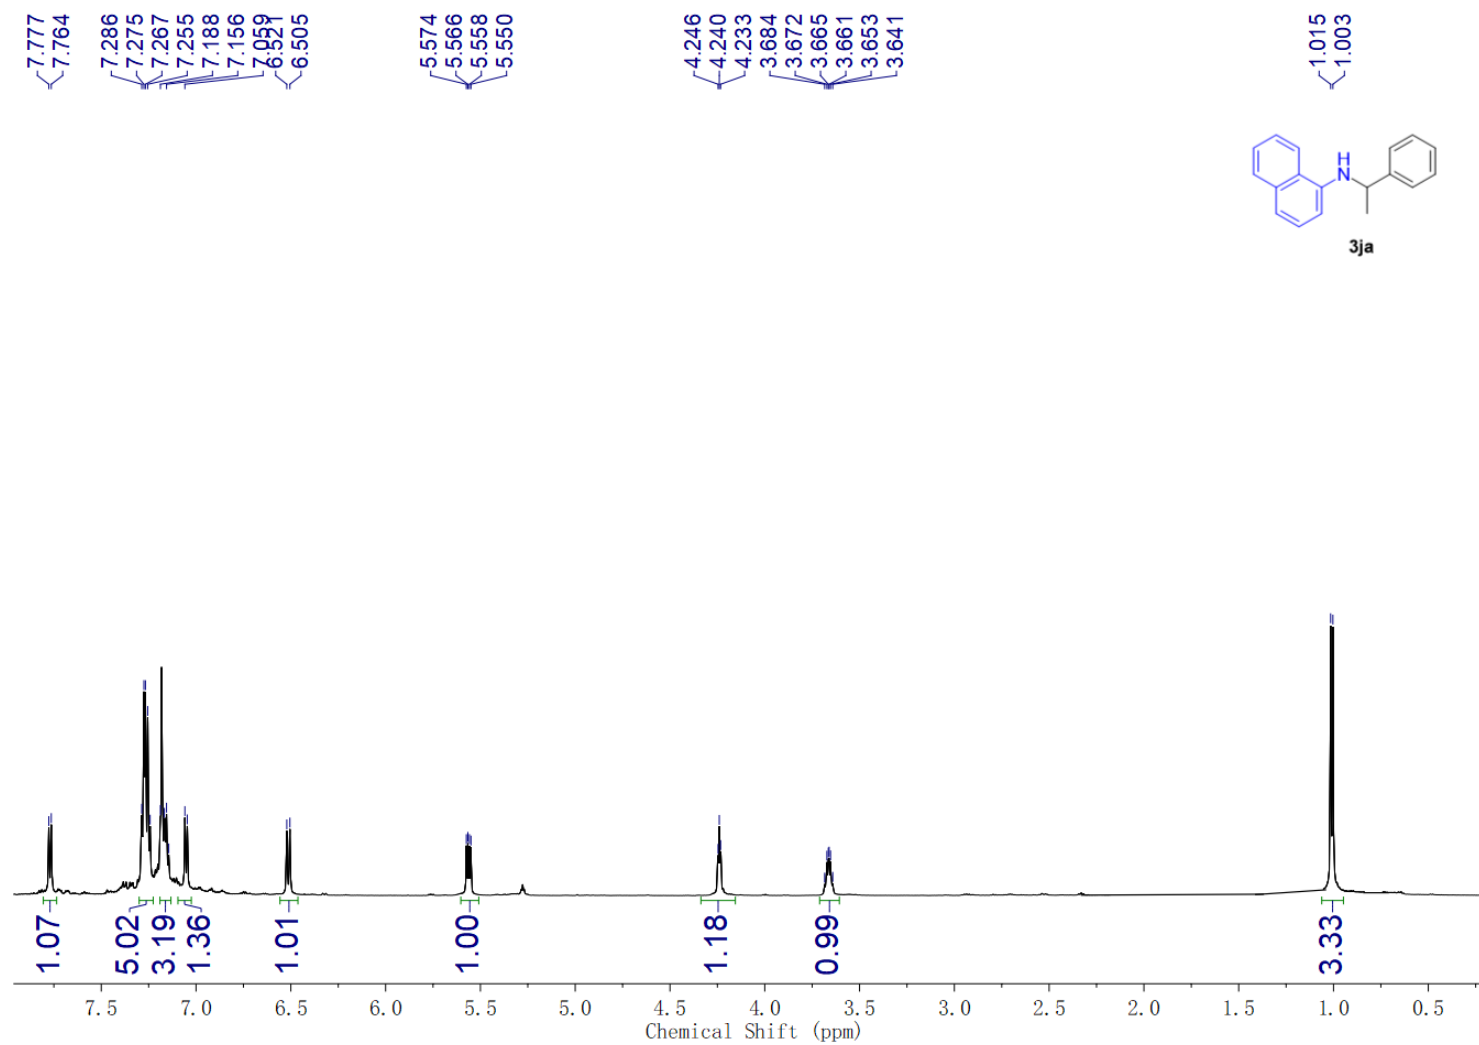

<sup>1</sup>H NMR (600 MHz, 298K, CDCl<sub>3</sub>) of **3ja**

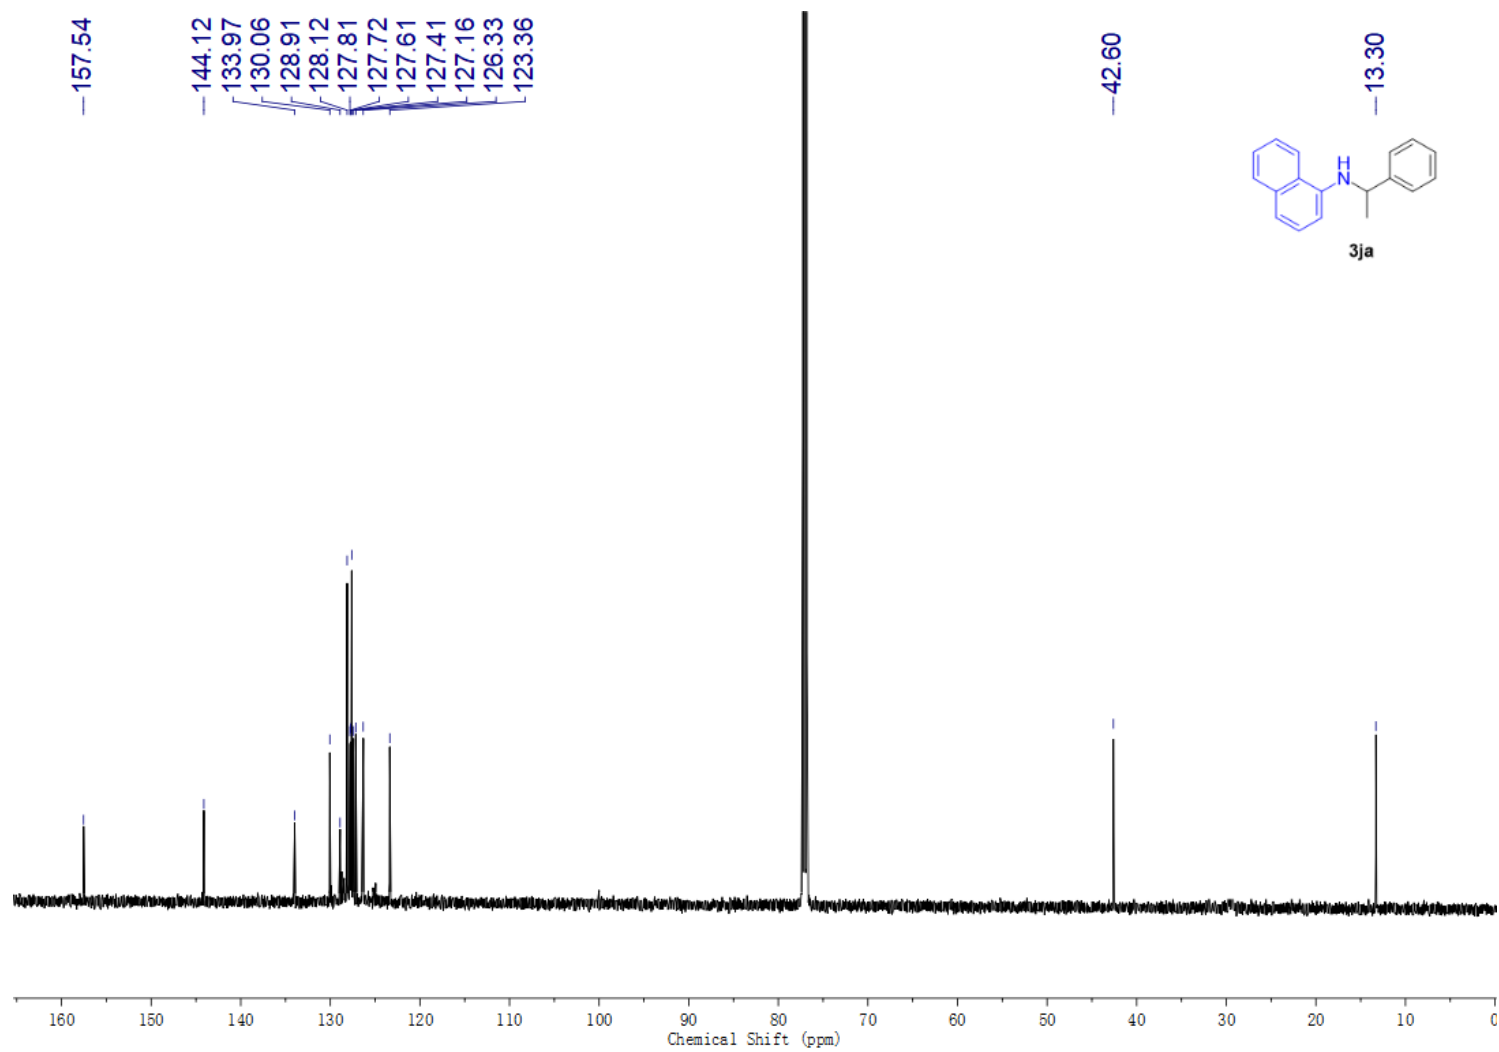

$^{13}\text{C}$  NMR (151 MHz, 298 K,  $\text{CDCl}_3$ ) of **3ja**

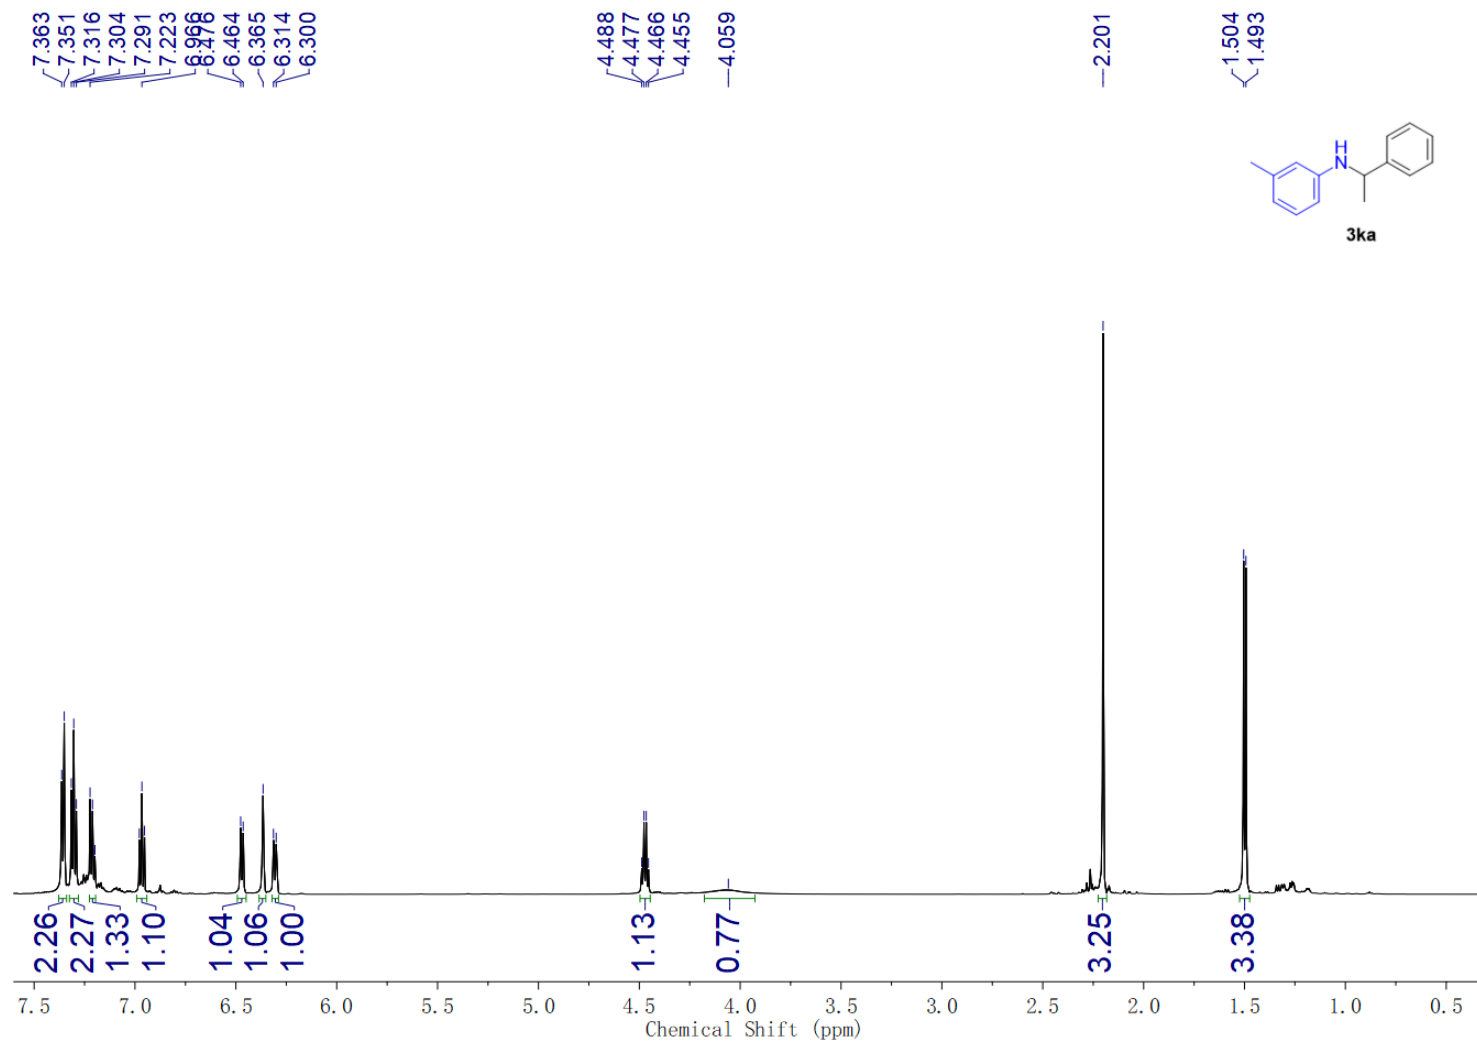

<sup>1</sup>H NMR (600 MHz, 298K, CDCl<sub>3</sub>) of **3ka**

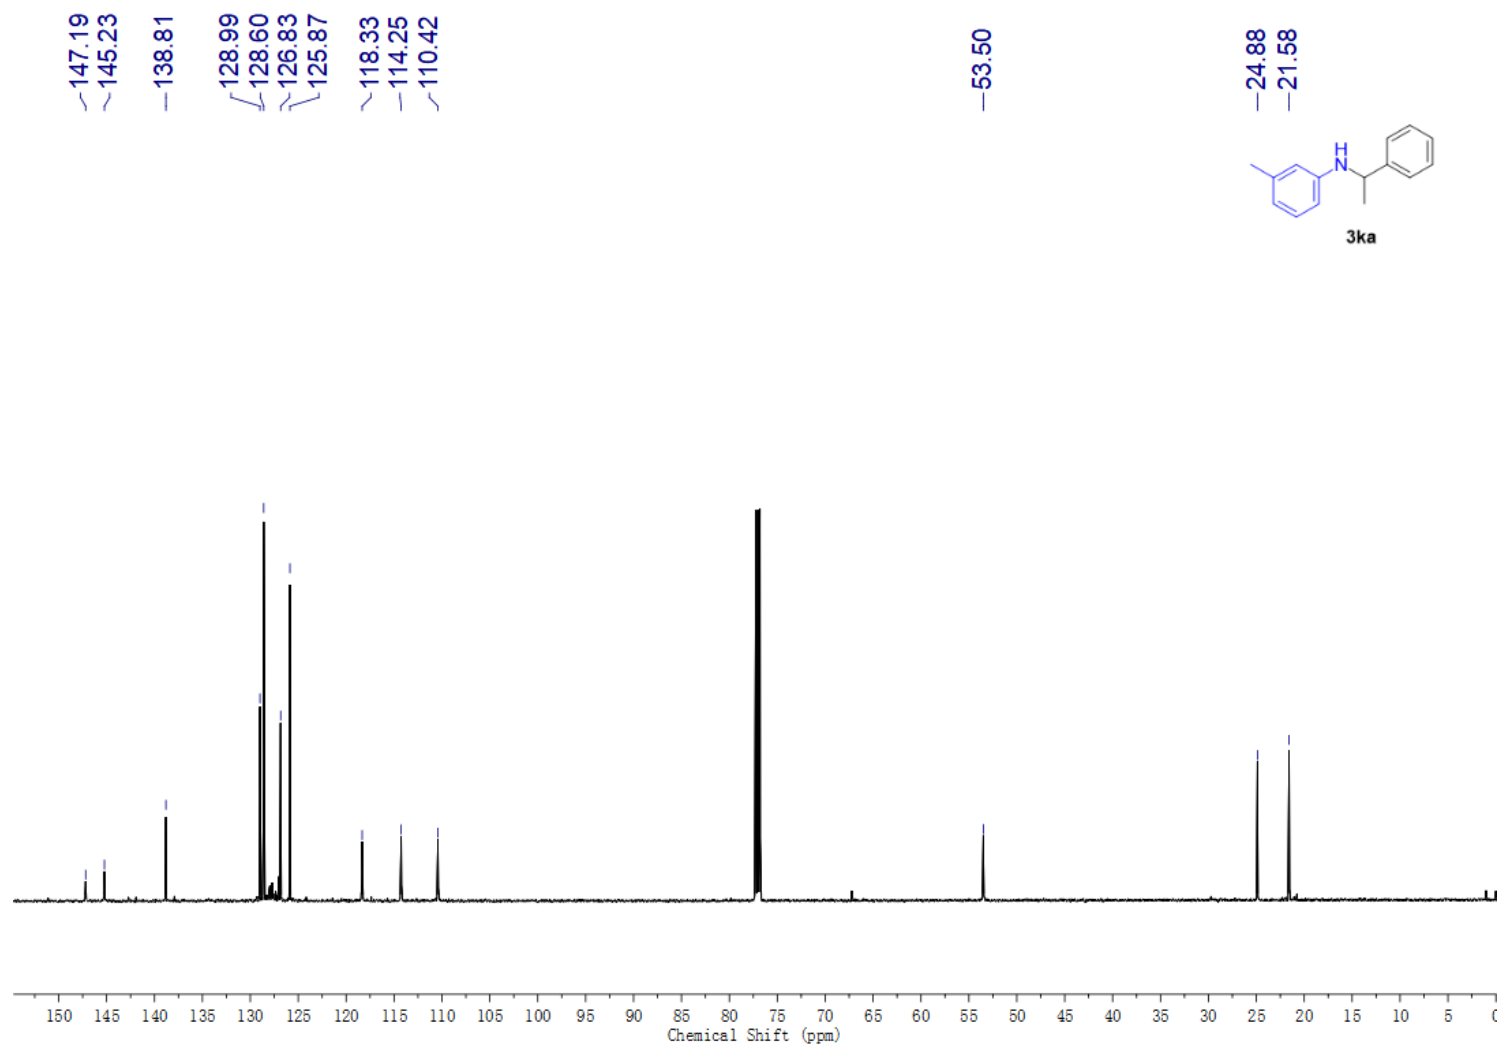

$^{13}\text{C}$  NMR (151 MHz, 298 K,  $\text{CDCl}_3$ ) of **3ka**



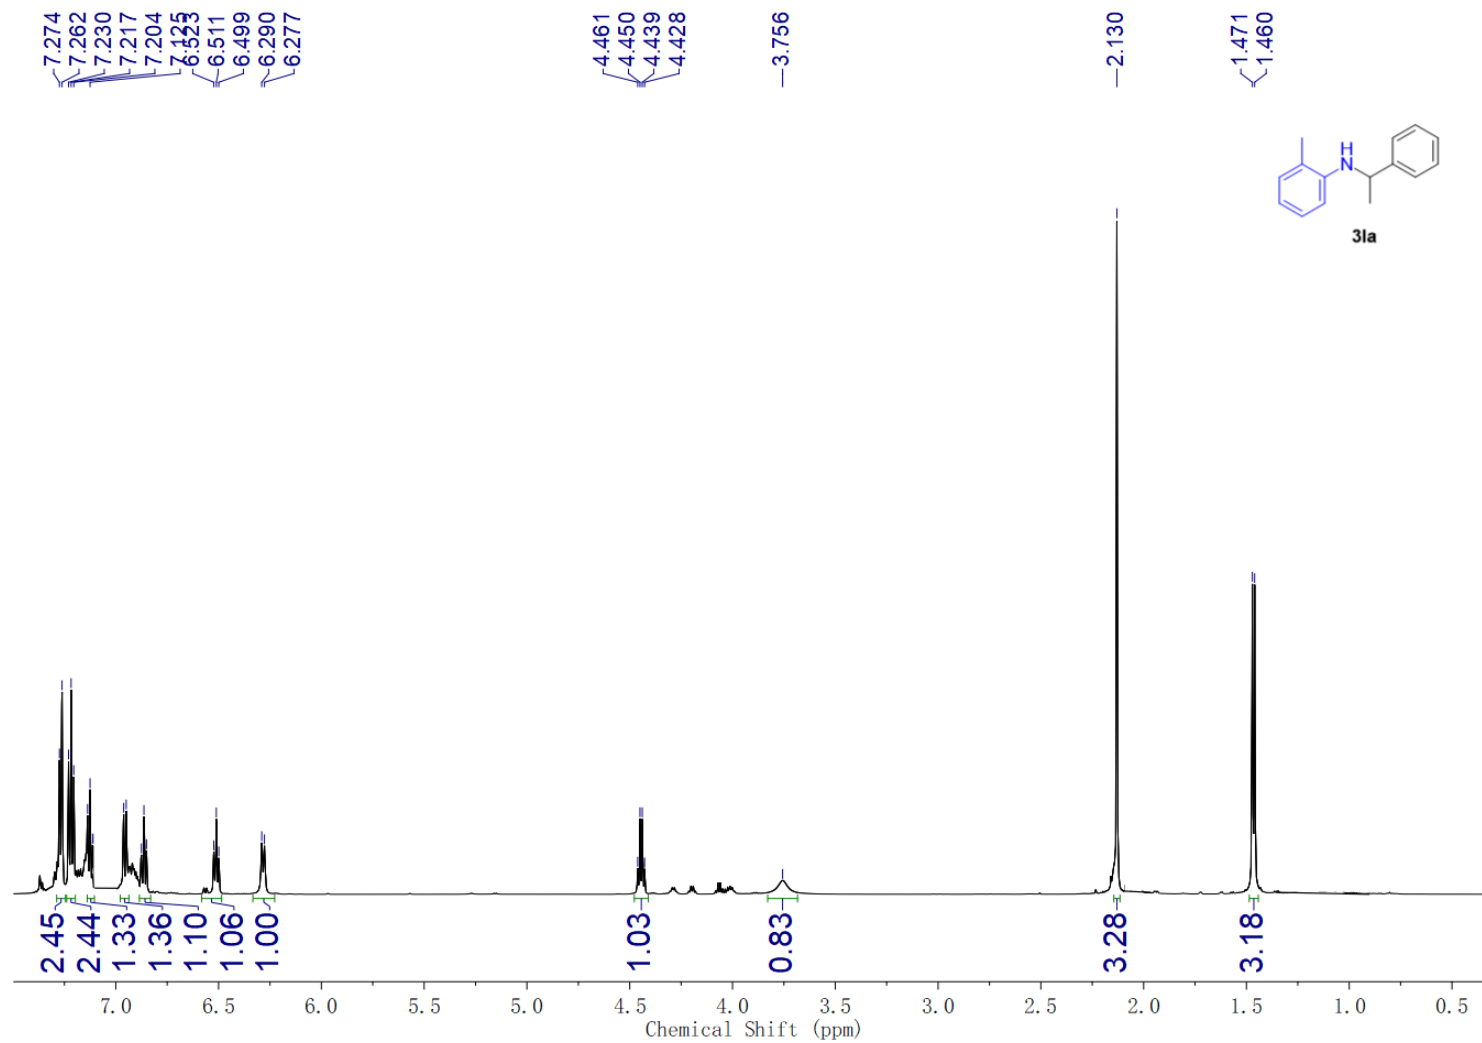

$^1\text{H}$  NMR (600 MHz, 298K,  $\text{CDCl}_3$ ) of **3la**

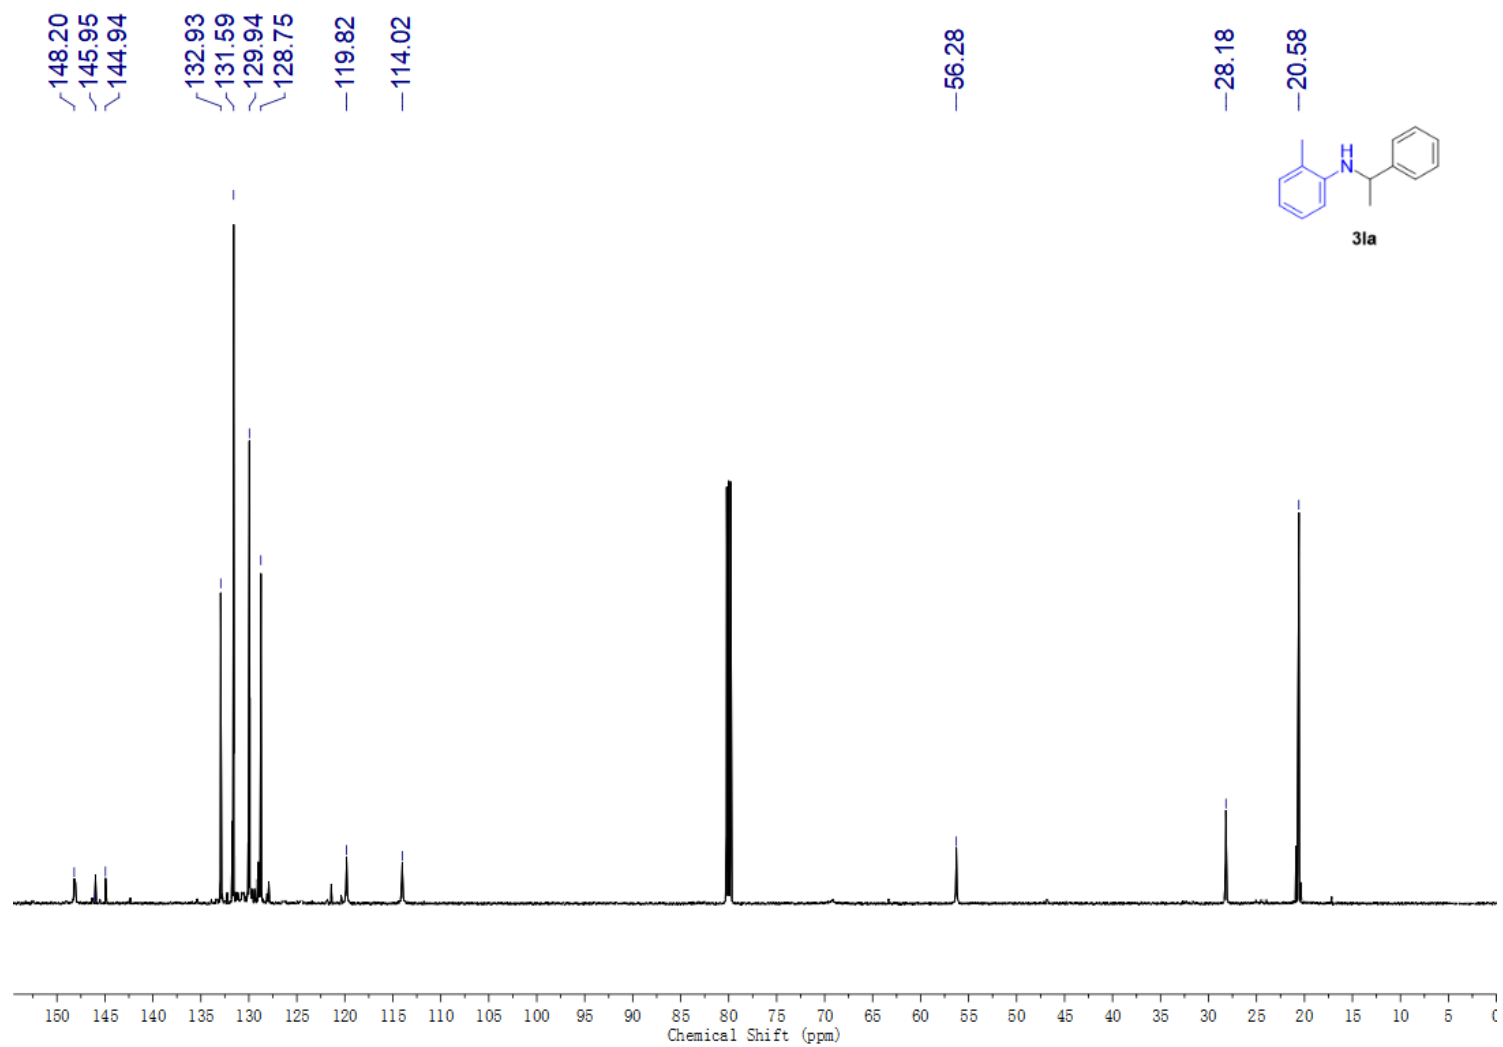

$^{13}\text{C}$  NMR (151 MHz, 298 K,  $\text{CDCl}_3$ ) of **3a**

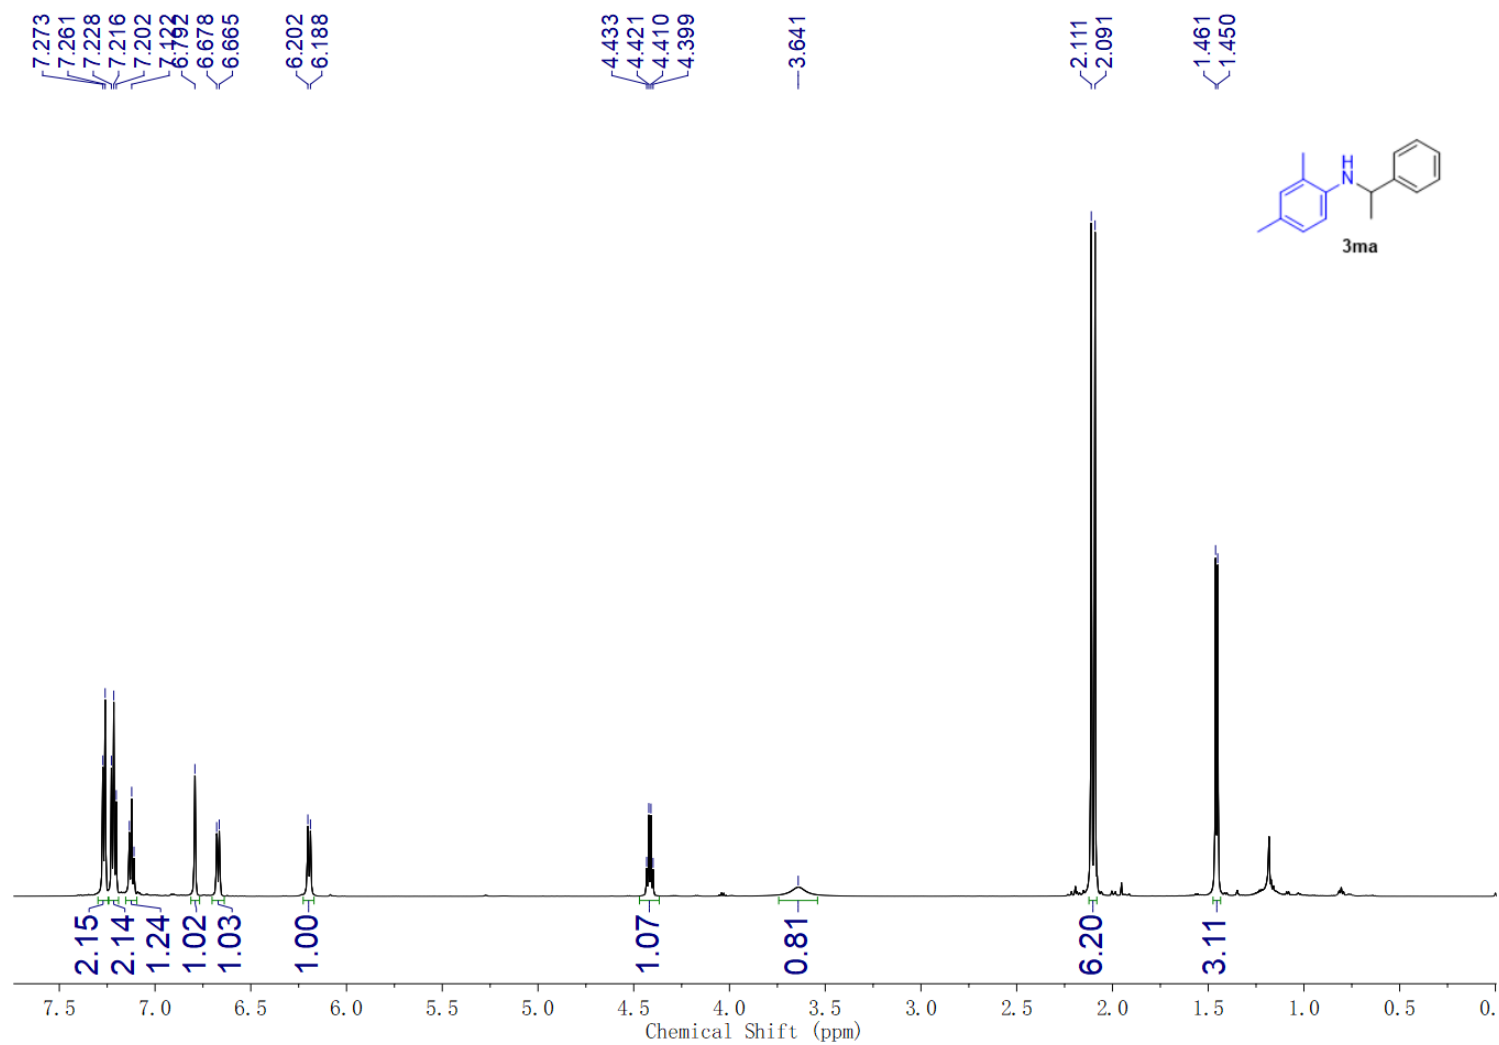

<sup>1</sup>H NMR (600 MHz, 298K, CDCl<sub>3</sub>) of **3ma**

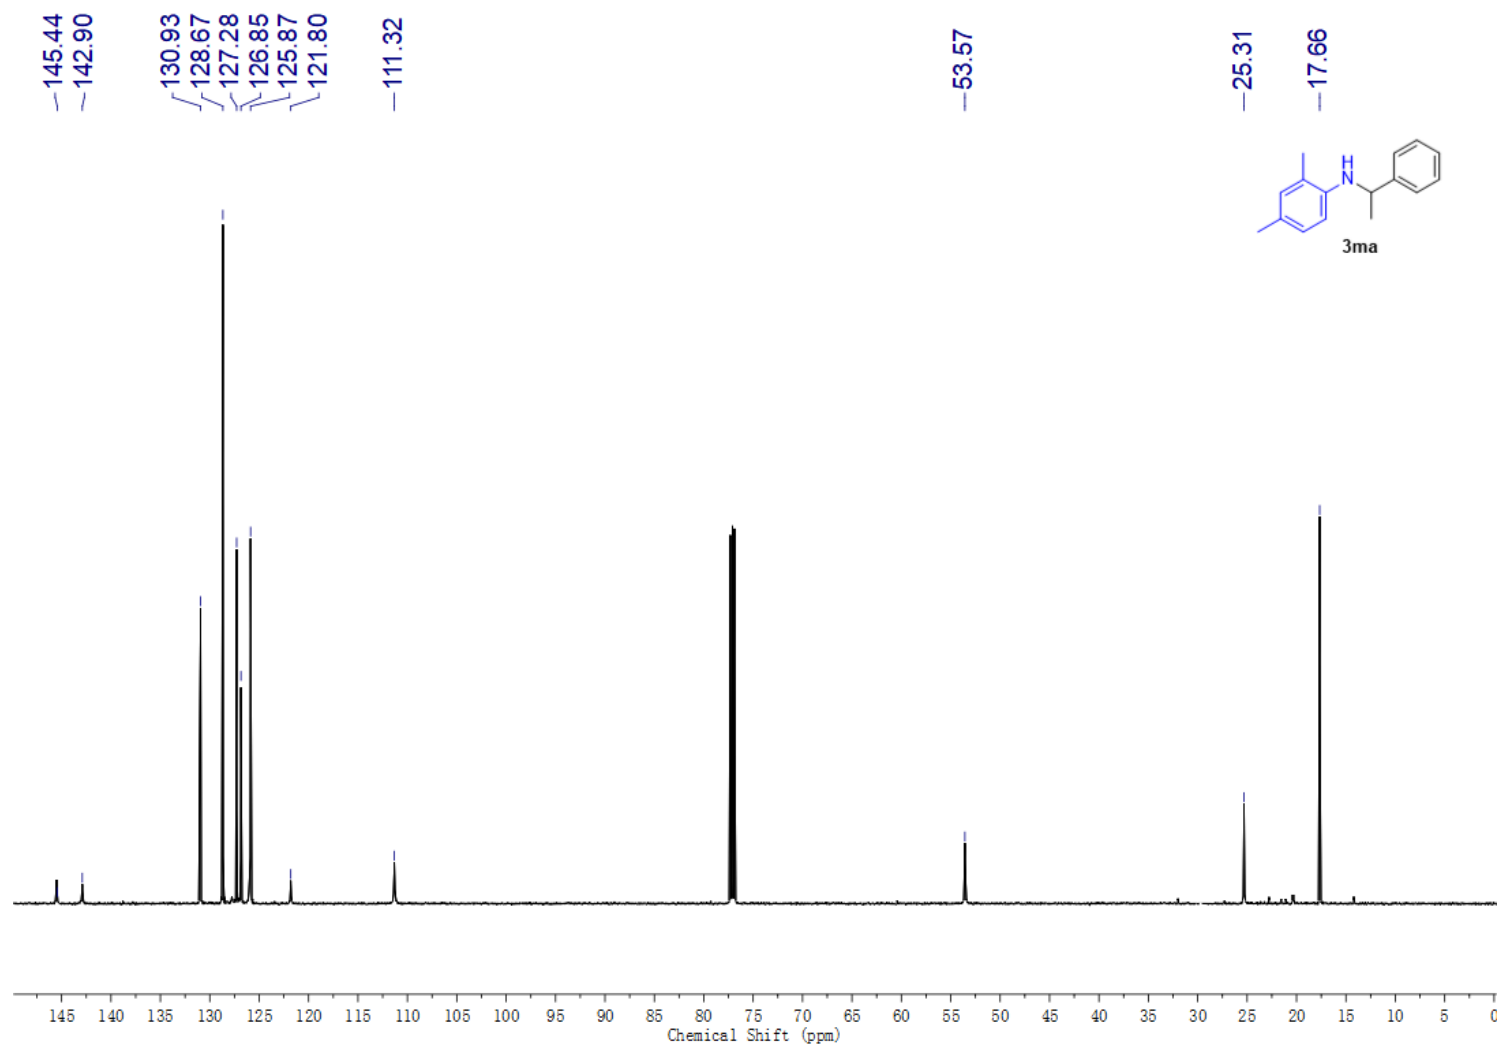

$^{13}\text{C}$  NMR (151 MHz, 298 K,  $\text{CDCl}_3$ ) of **3ma**

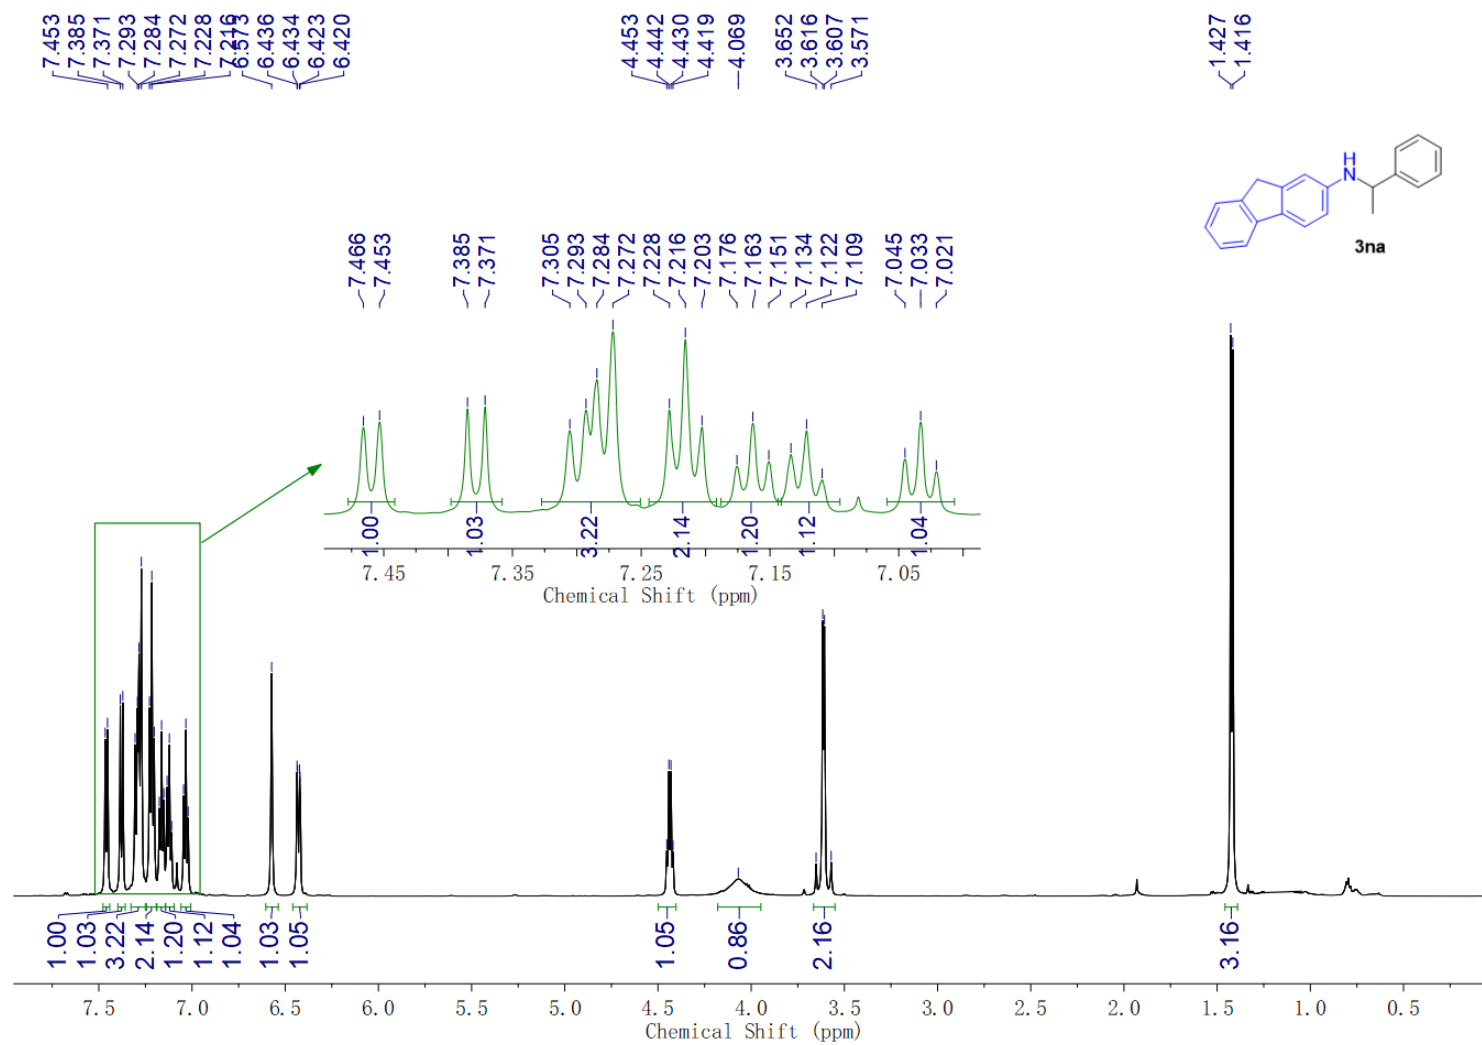

**<sup>1</sup>H NMR (600 MHz, 298K, CDCl<sub>3</sub>) of 3na**

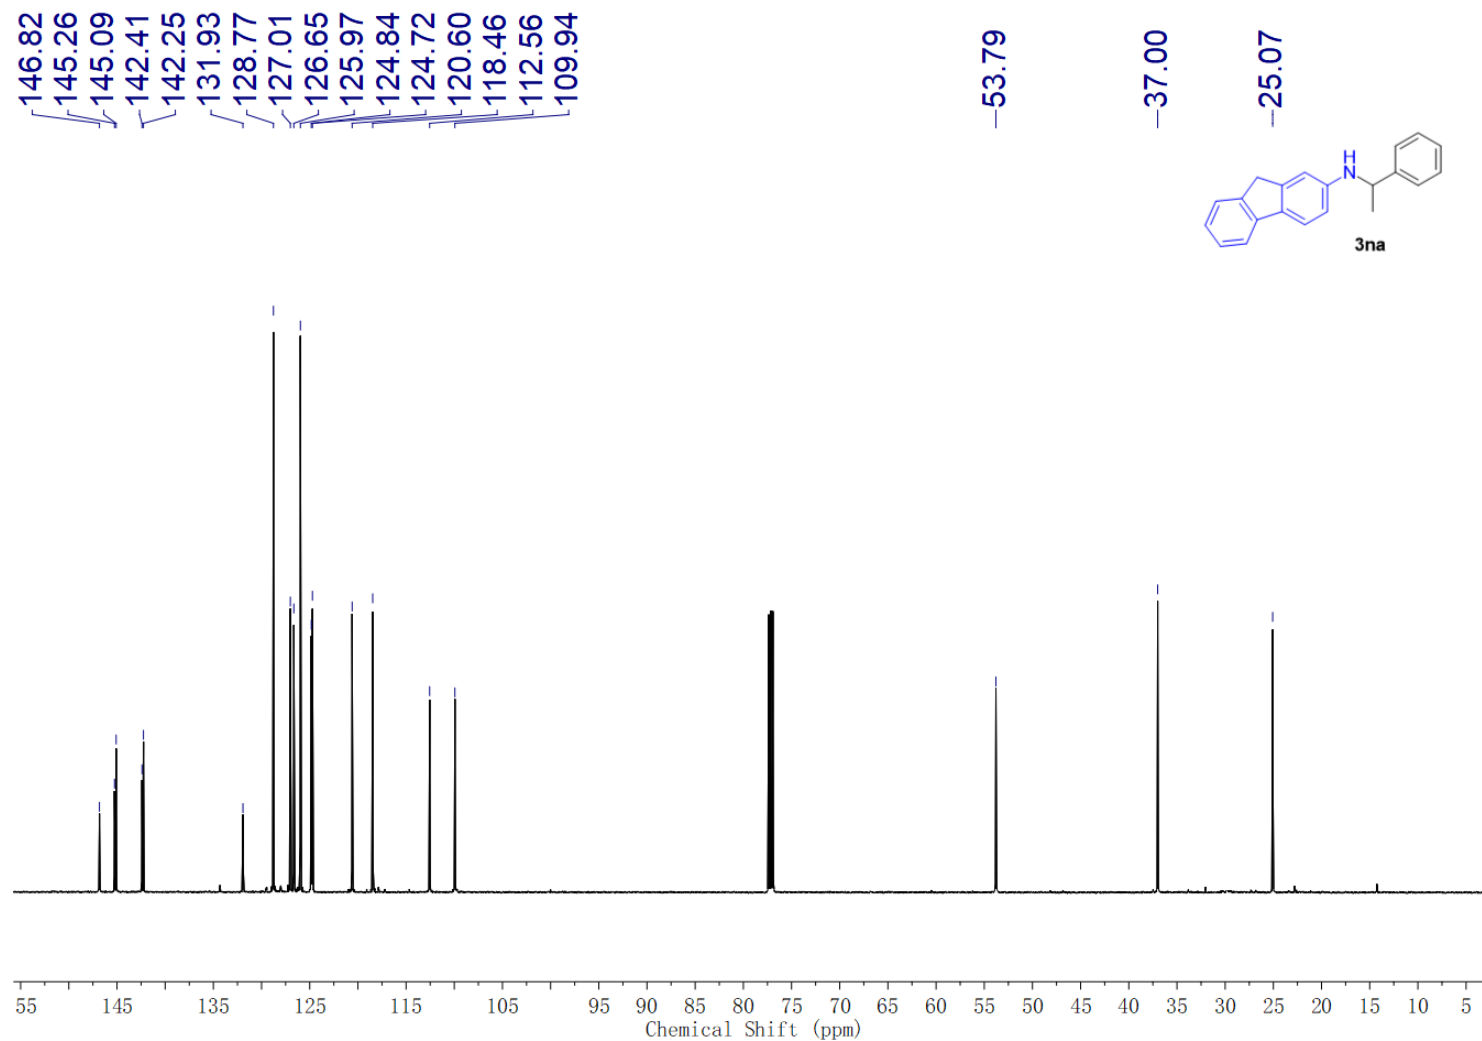

$^{13}\text{C}$  NMR (151 MHz, 298 K,  $\text{CDCl}_3$ ) of **3na**

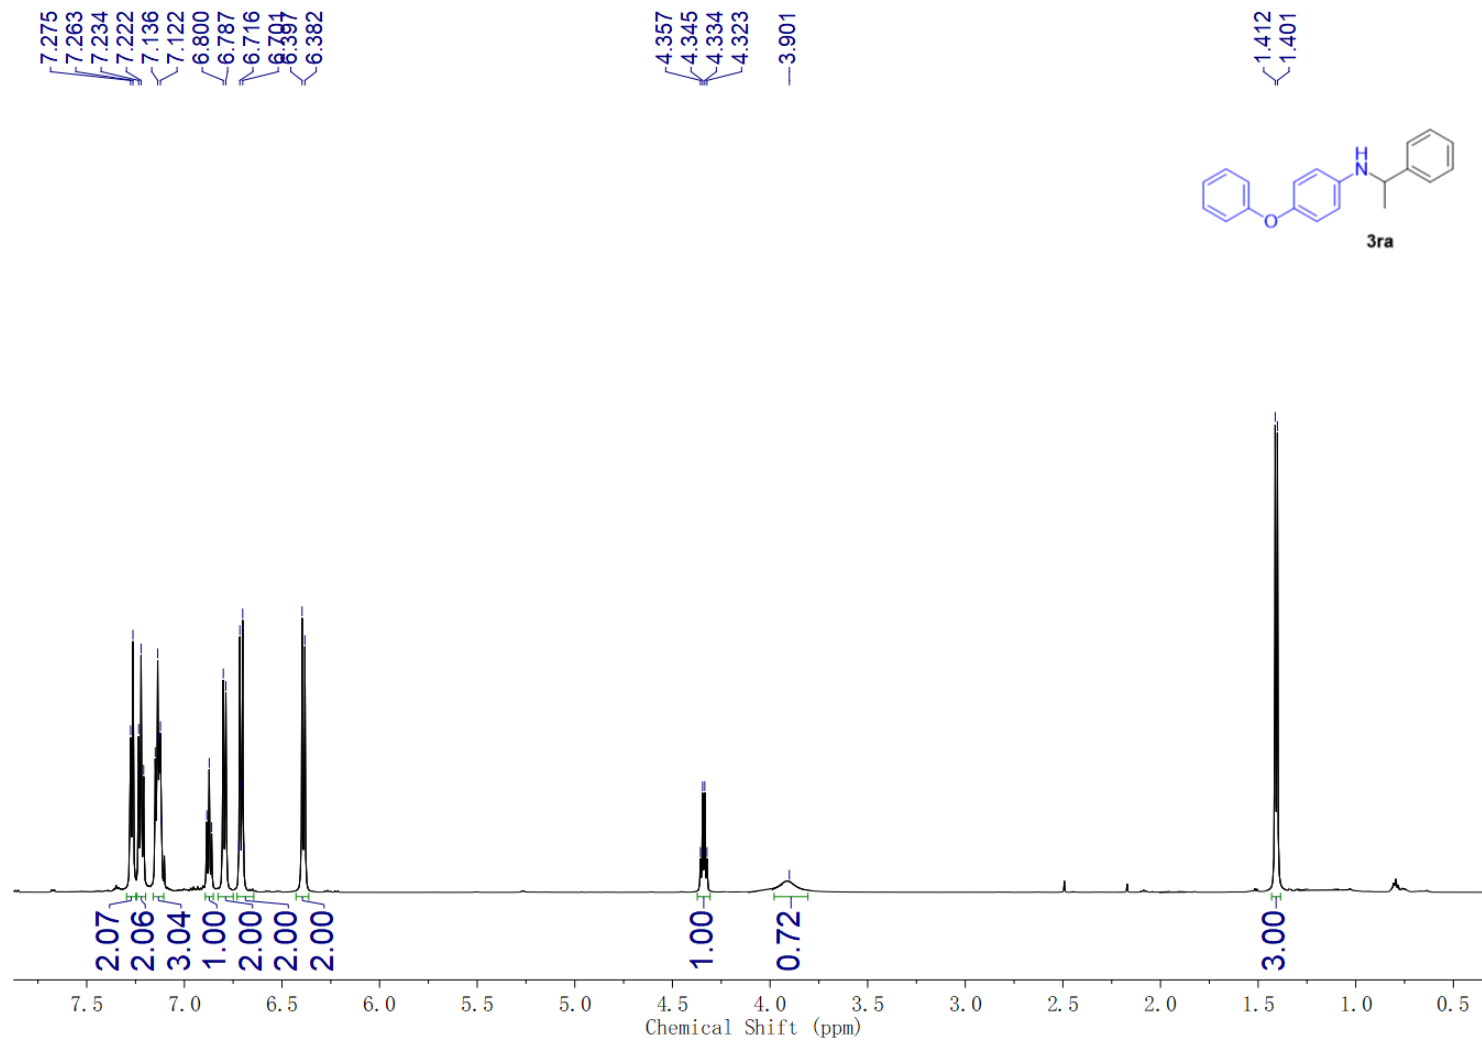

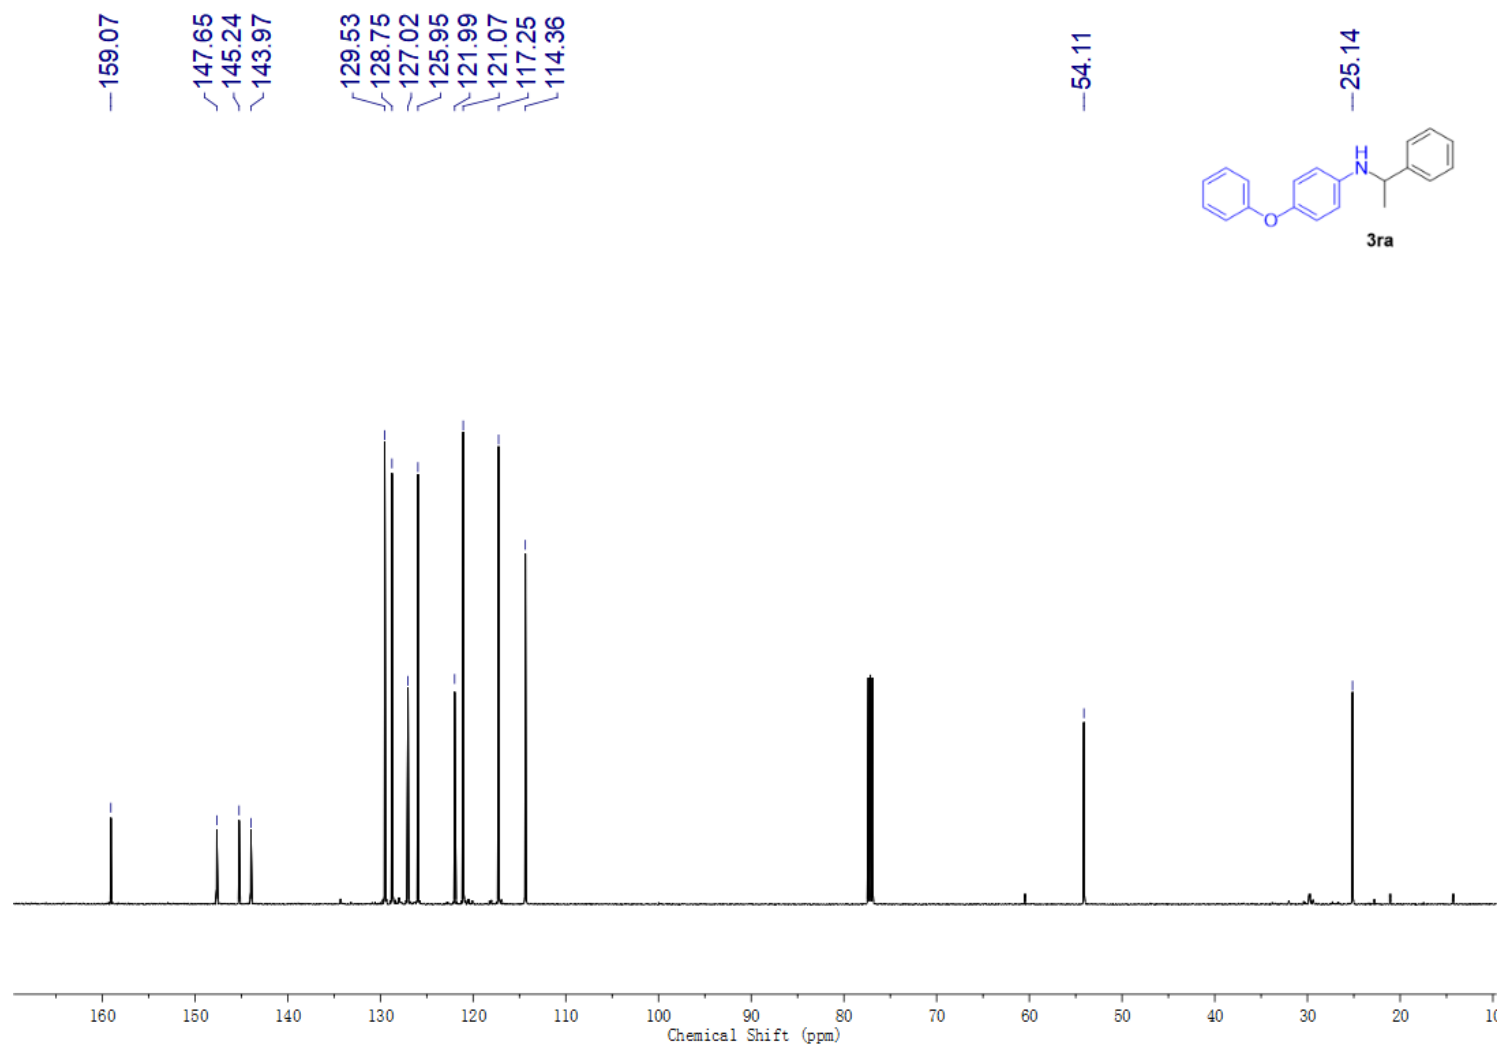

$^{13}\text{C}$  NMR (151 MHz, 298 K,  $\text{CDCl}_3$ ) of **3ra**



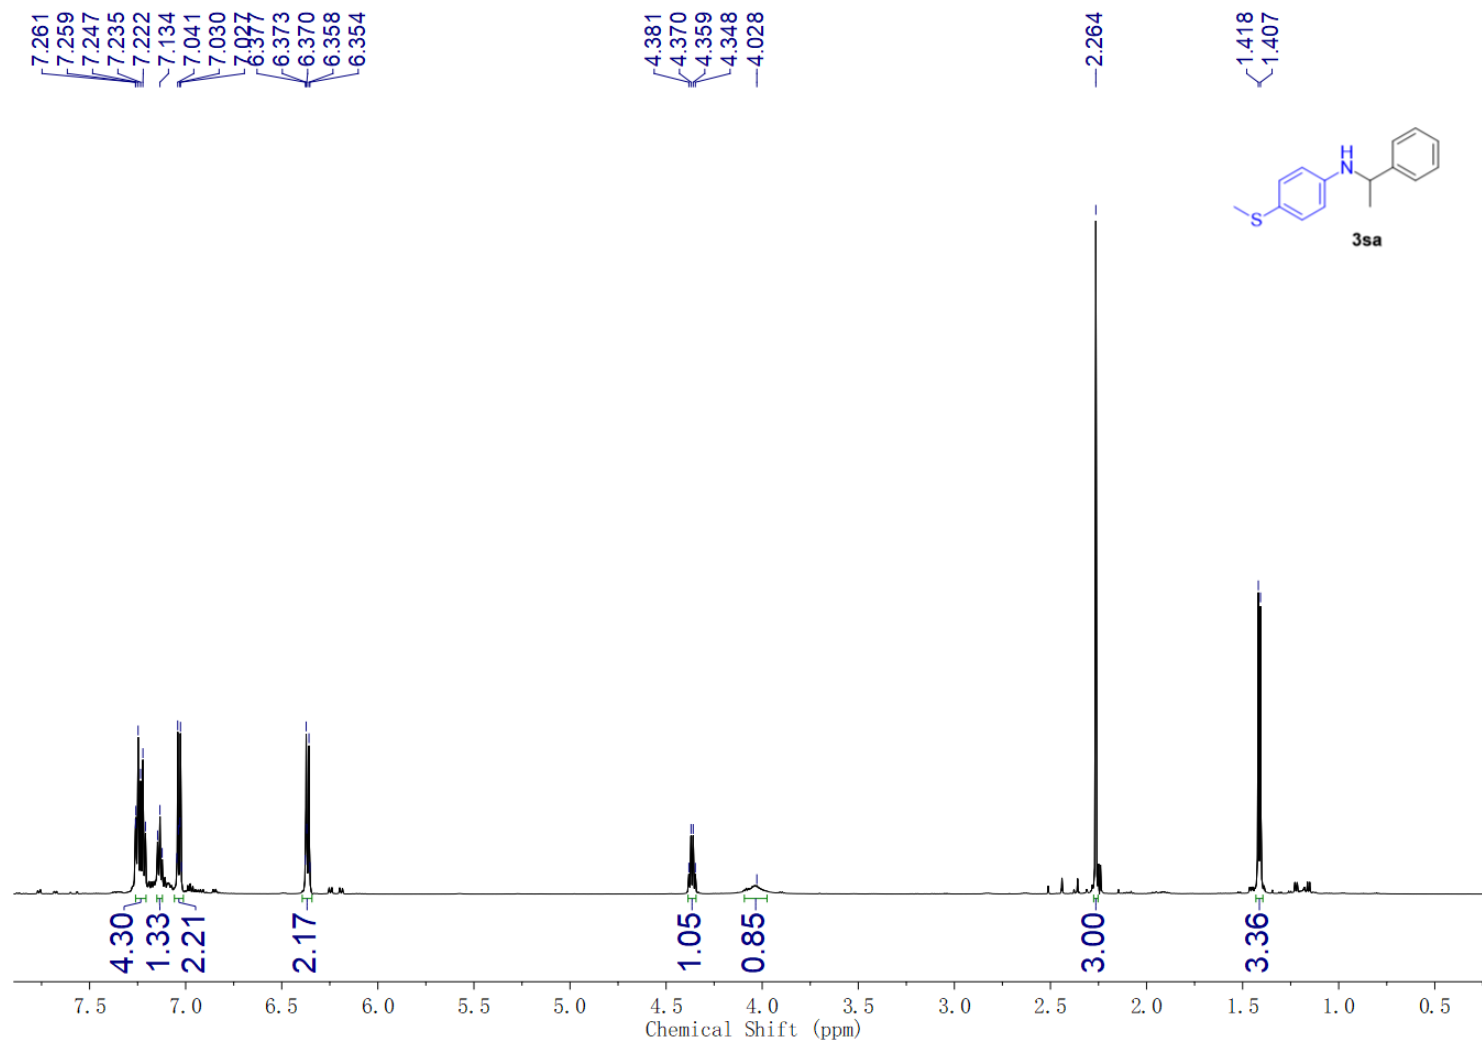

$^1\text{H}$  NMR (600 MHz, 298K,  $\text{CDCl}_3$ ) of **3sa**

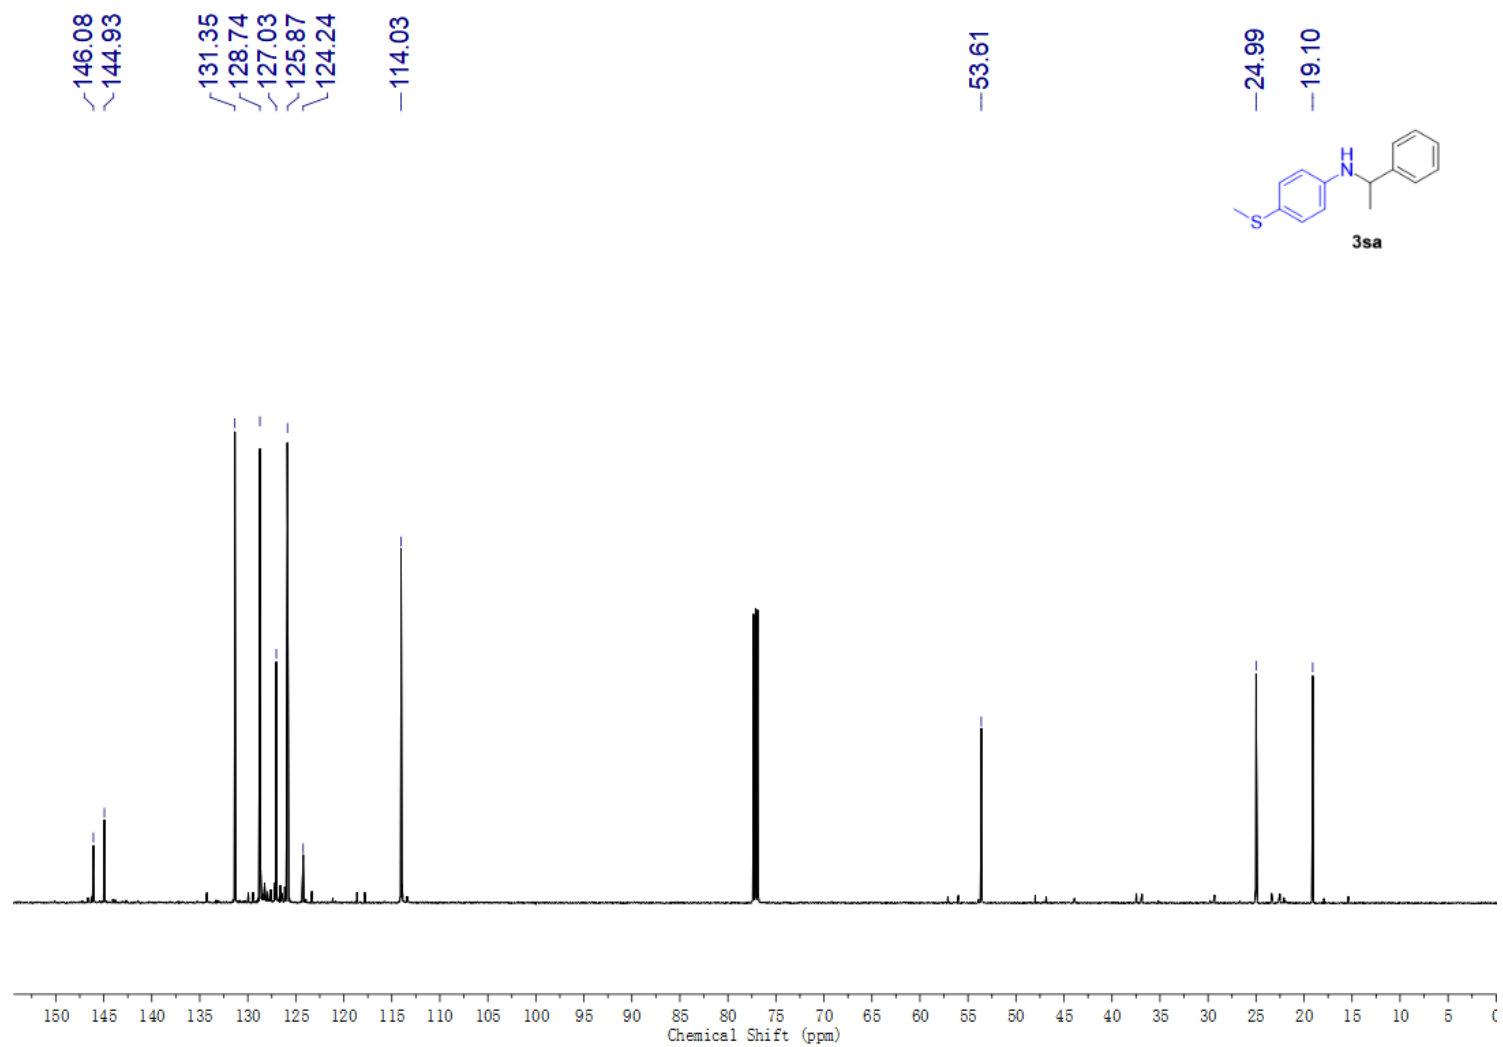

$^{13}\text{C}$  NMR (151 MHz, 298 K,  $\text{CDCl}_3$ ) of **3sa**

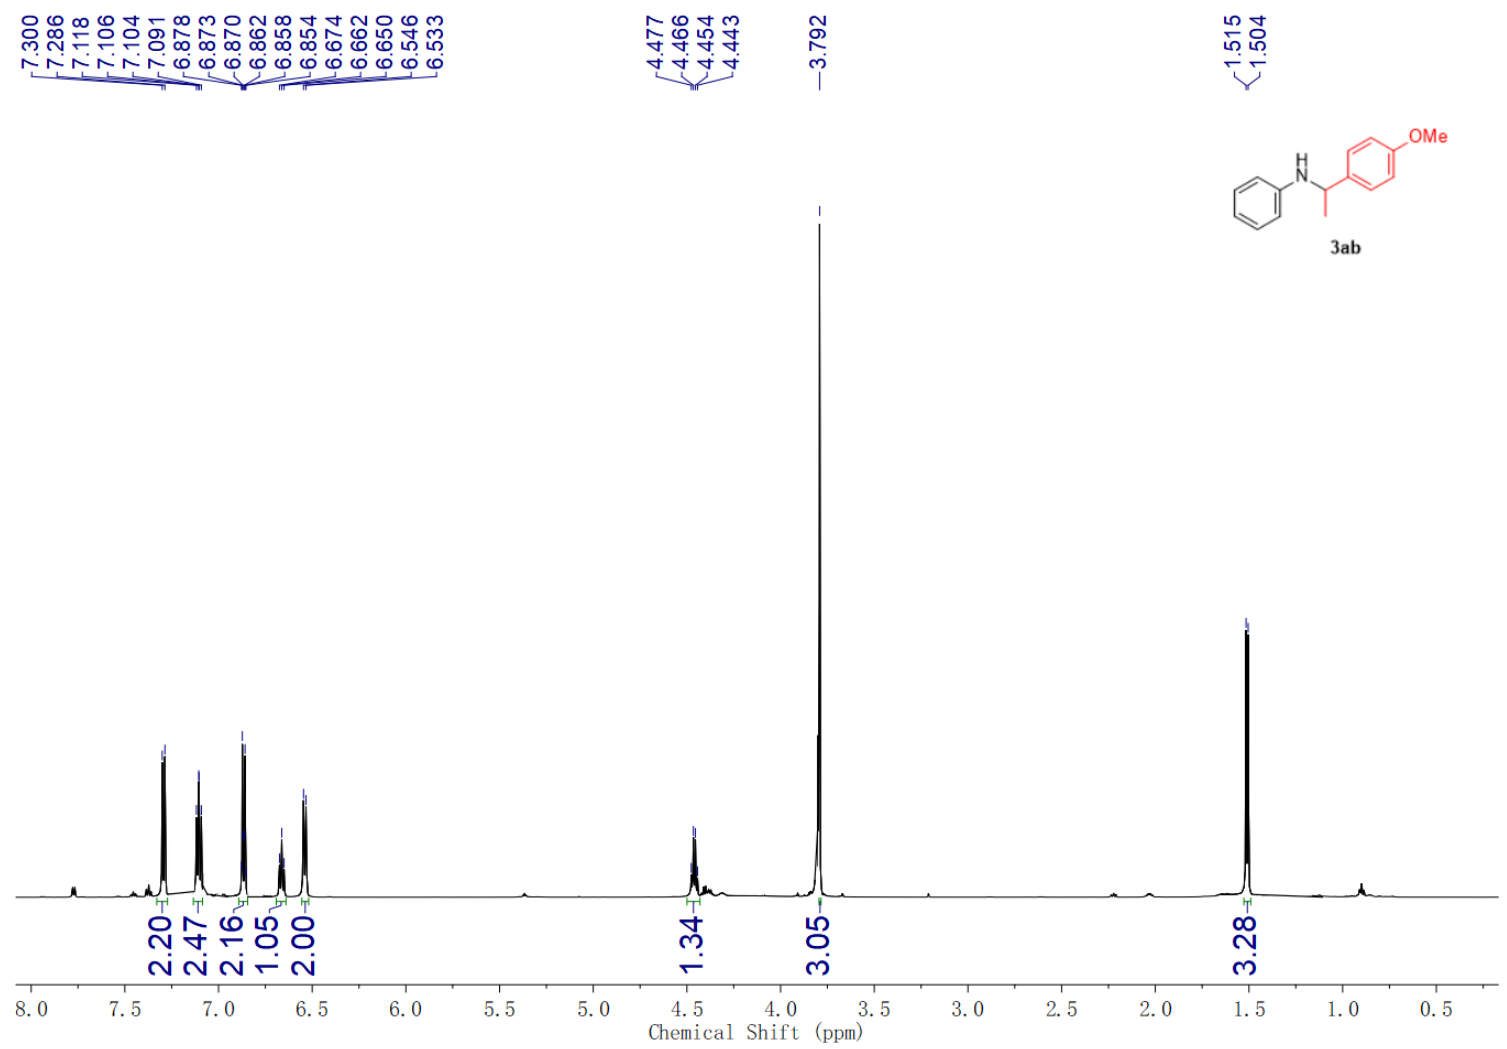

$^1\text{H}$  NMR (600 MHz, 298K,  $\text{CDCl}_3$ ) of **3ab**

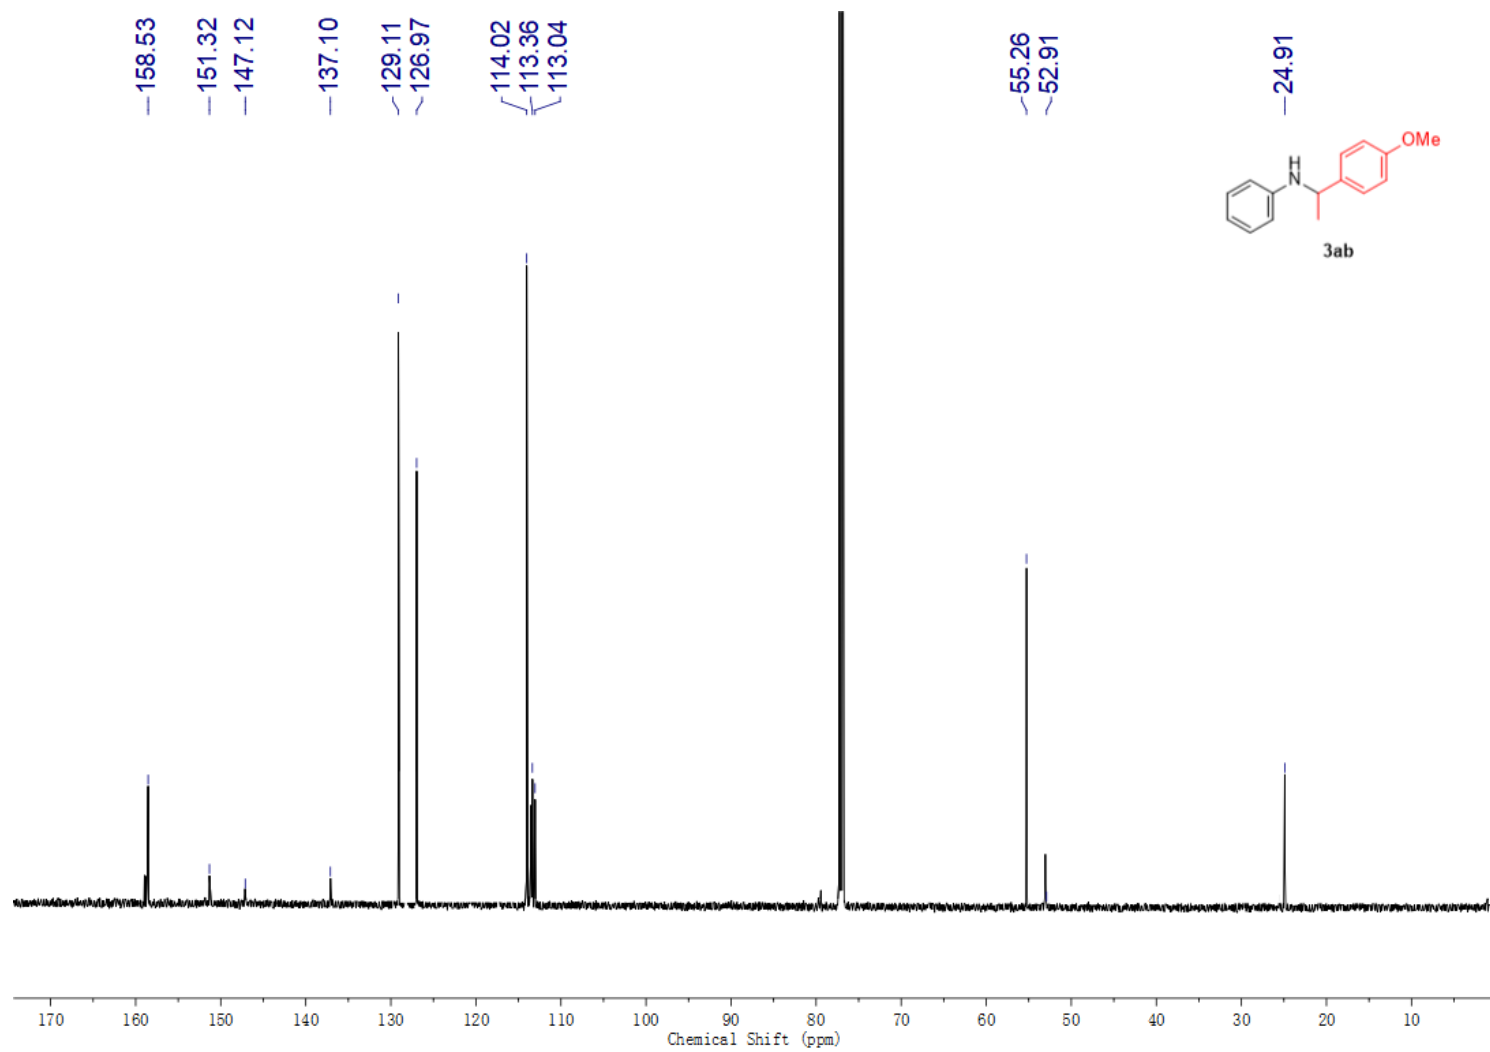

$^{13}\text{C}$  NMR (151 MHz, 298 K,  $\text{CDCl}_3$ ) of **3ab**

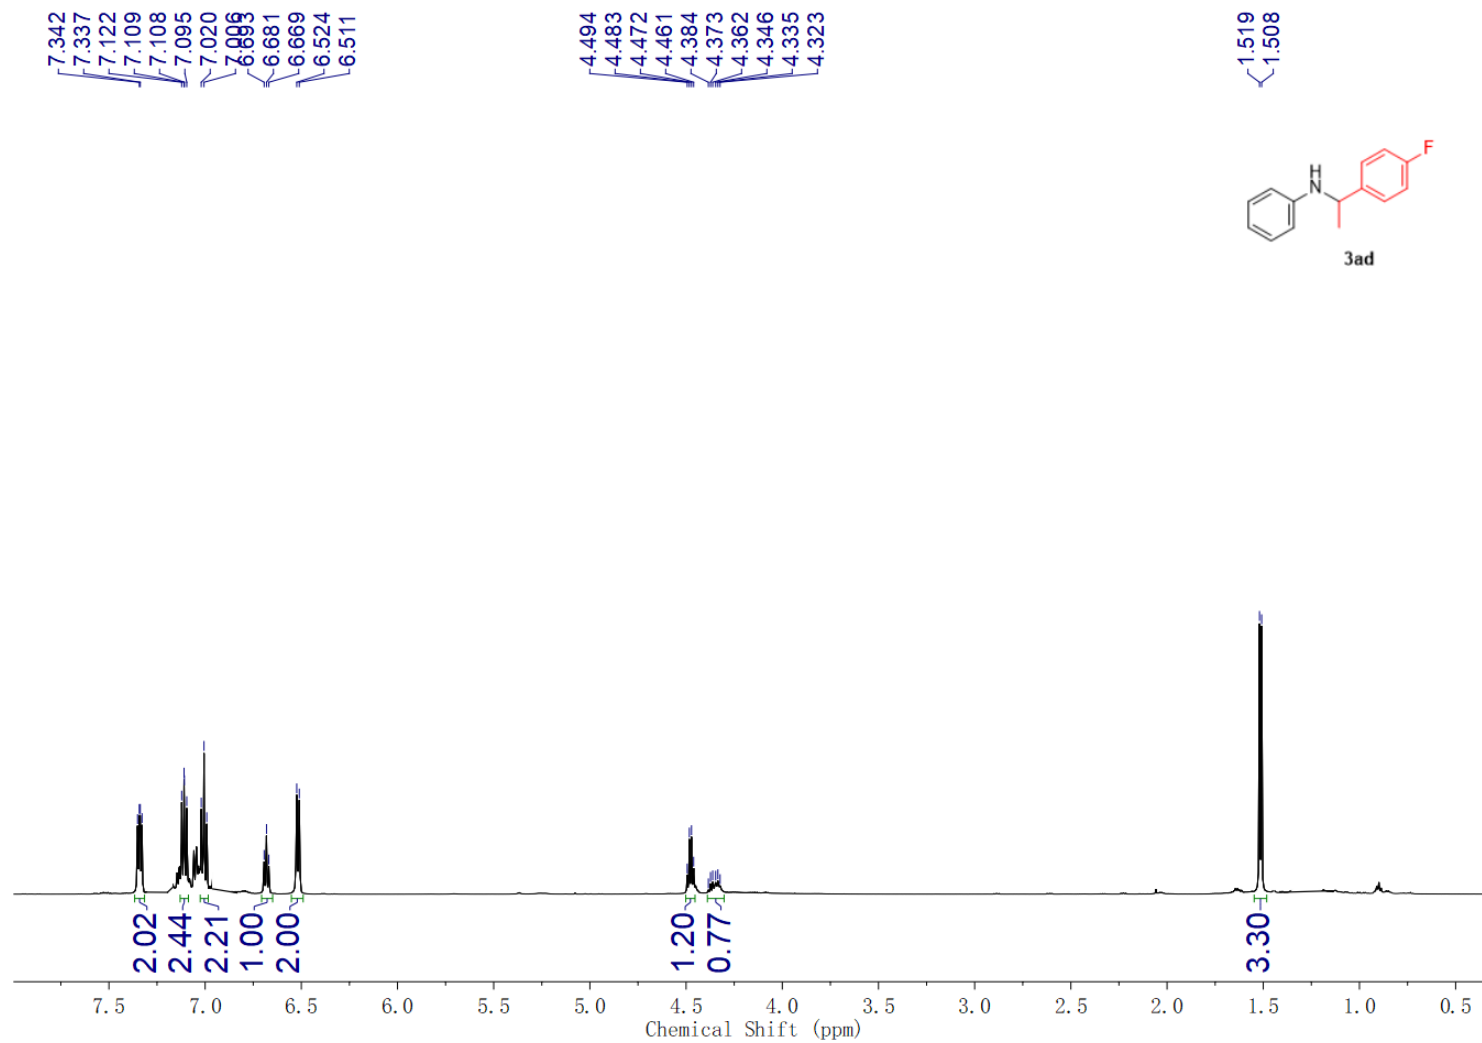

$^1\text{H}$  NMR (600 MHz, 298K,  $\text{CDCl}_3$ ) of **3ad**

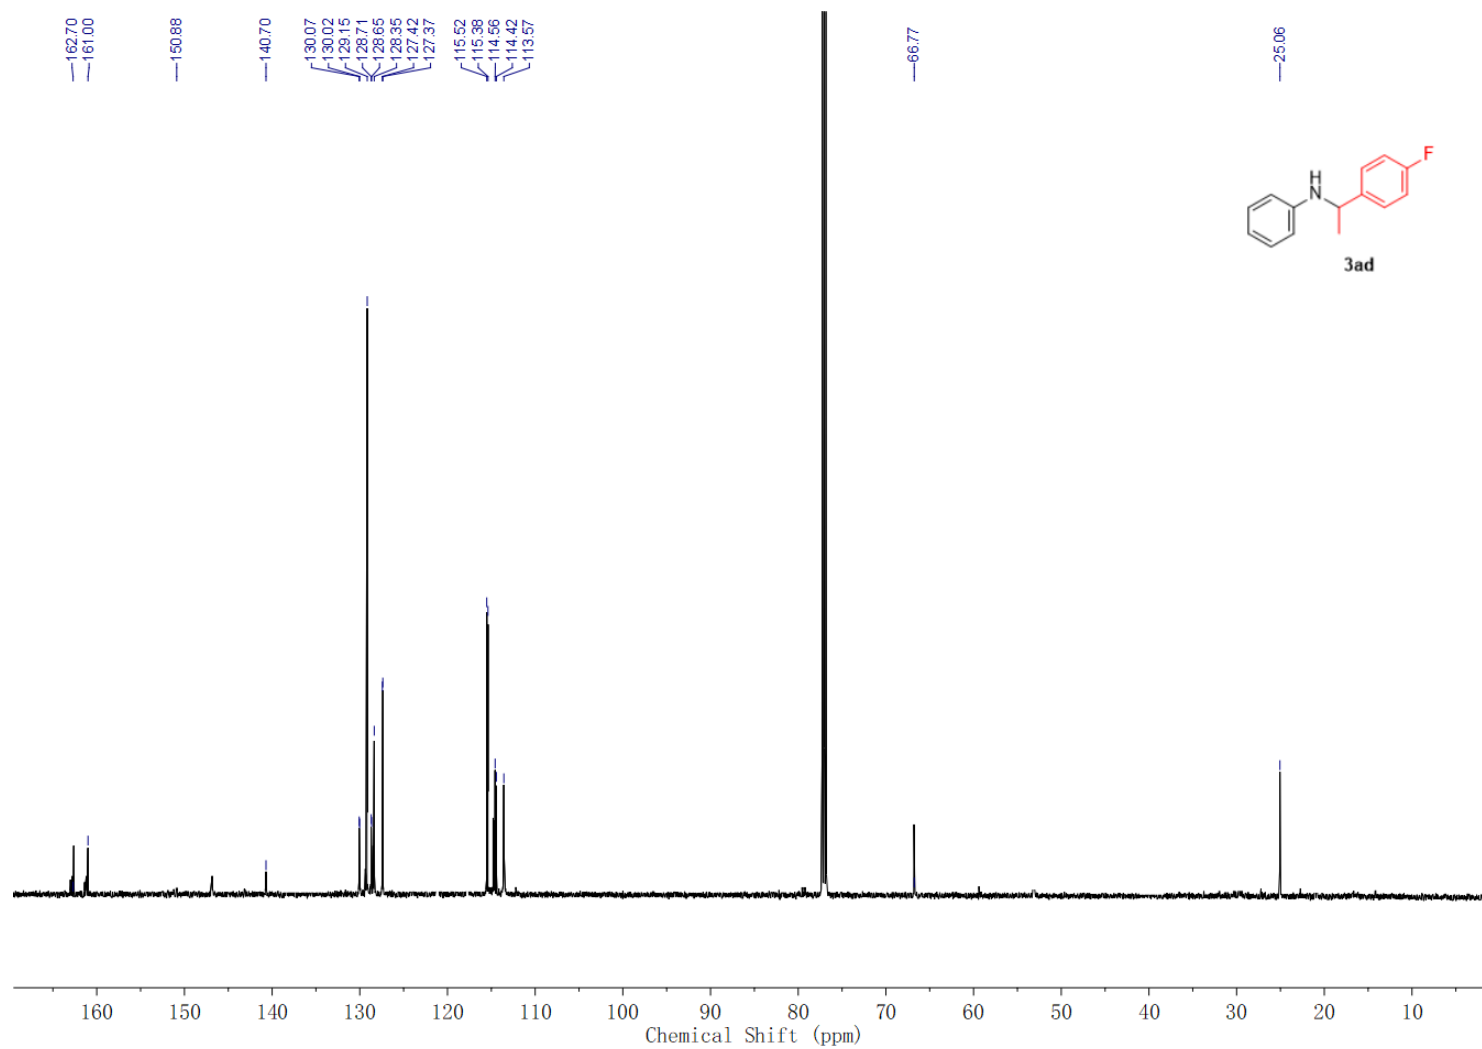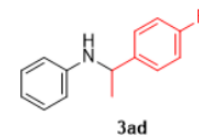

$^{13}\text{C}$  NMR (151 MHz, 298 K,  $\text{CDCl}_3$ ) of **3ad**

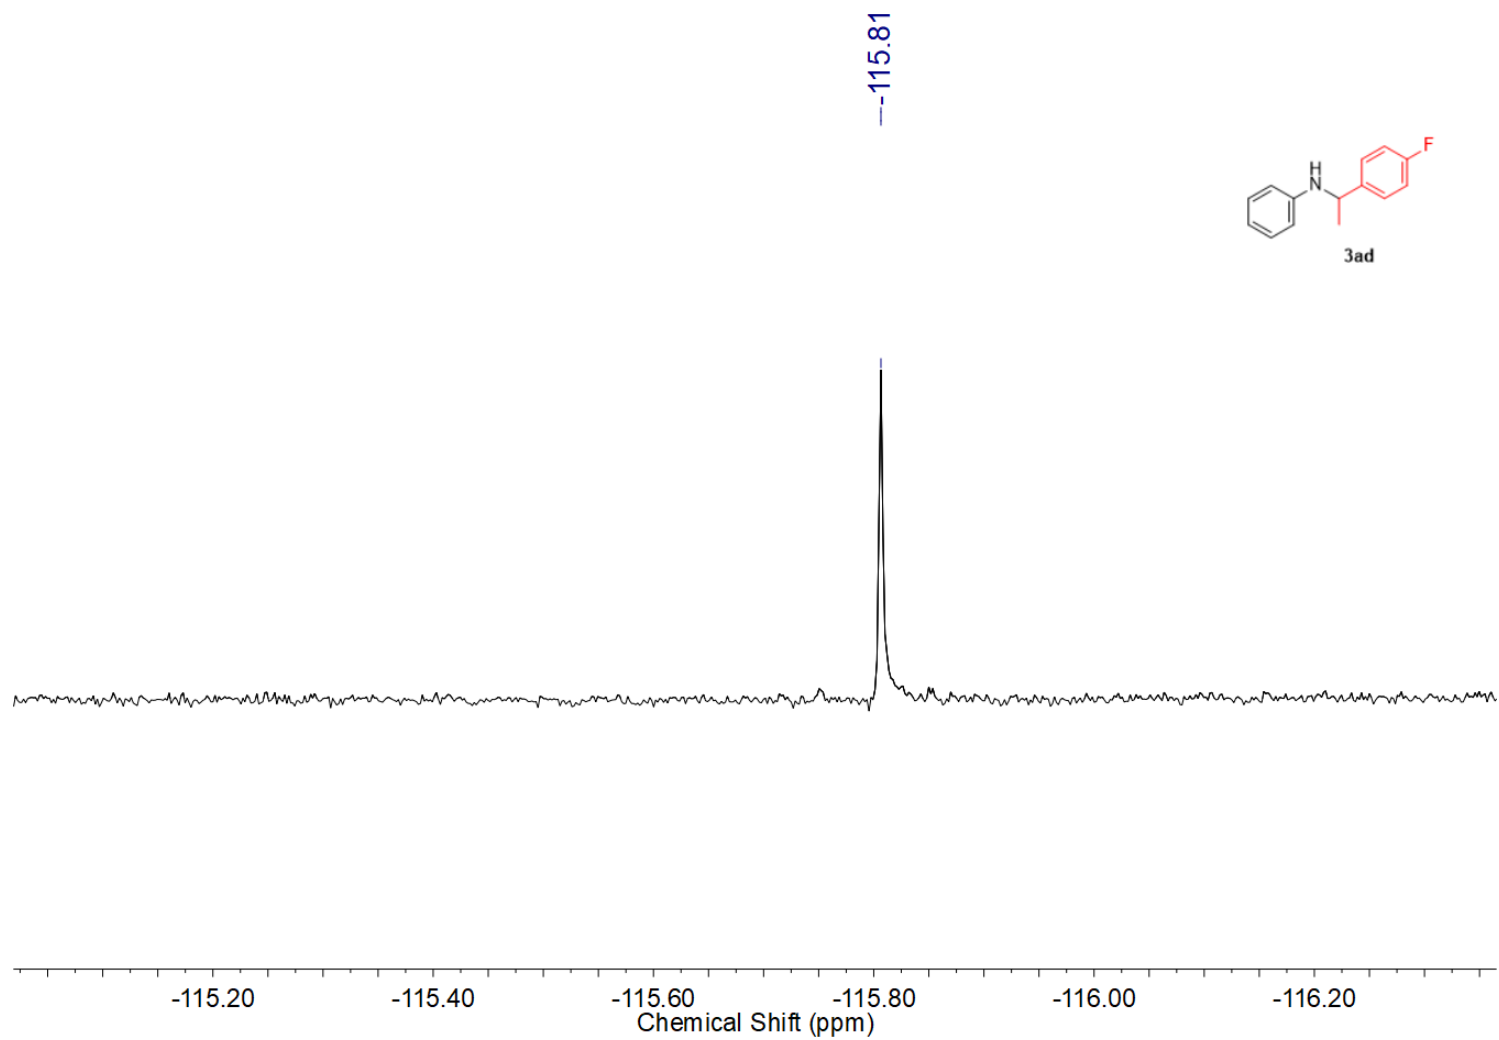

$^{19}\text{F}$  NMR (564 MHz, 298 K,  $\text{CDCl}_3$ ) of **3ha**

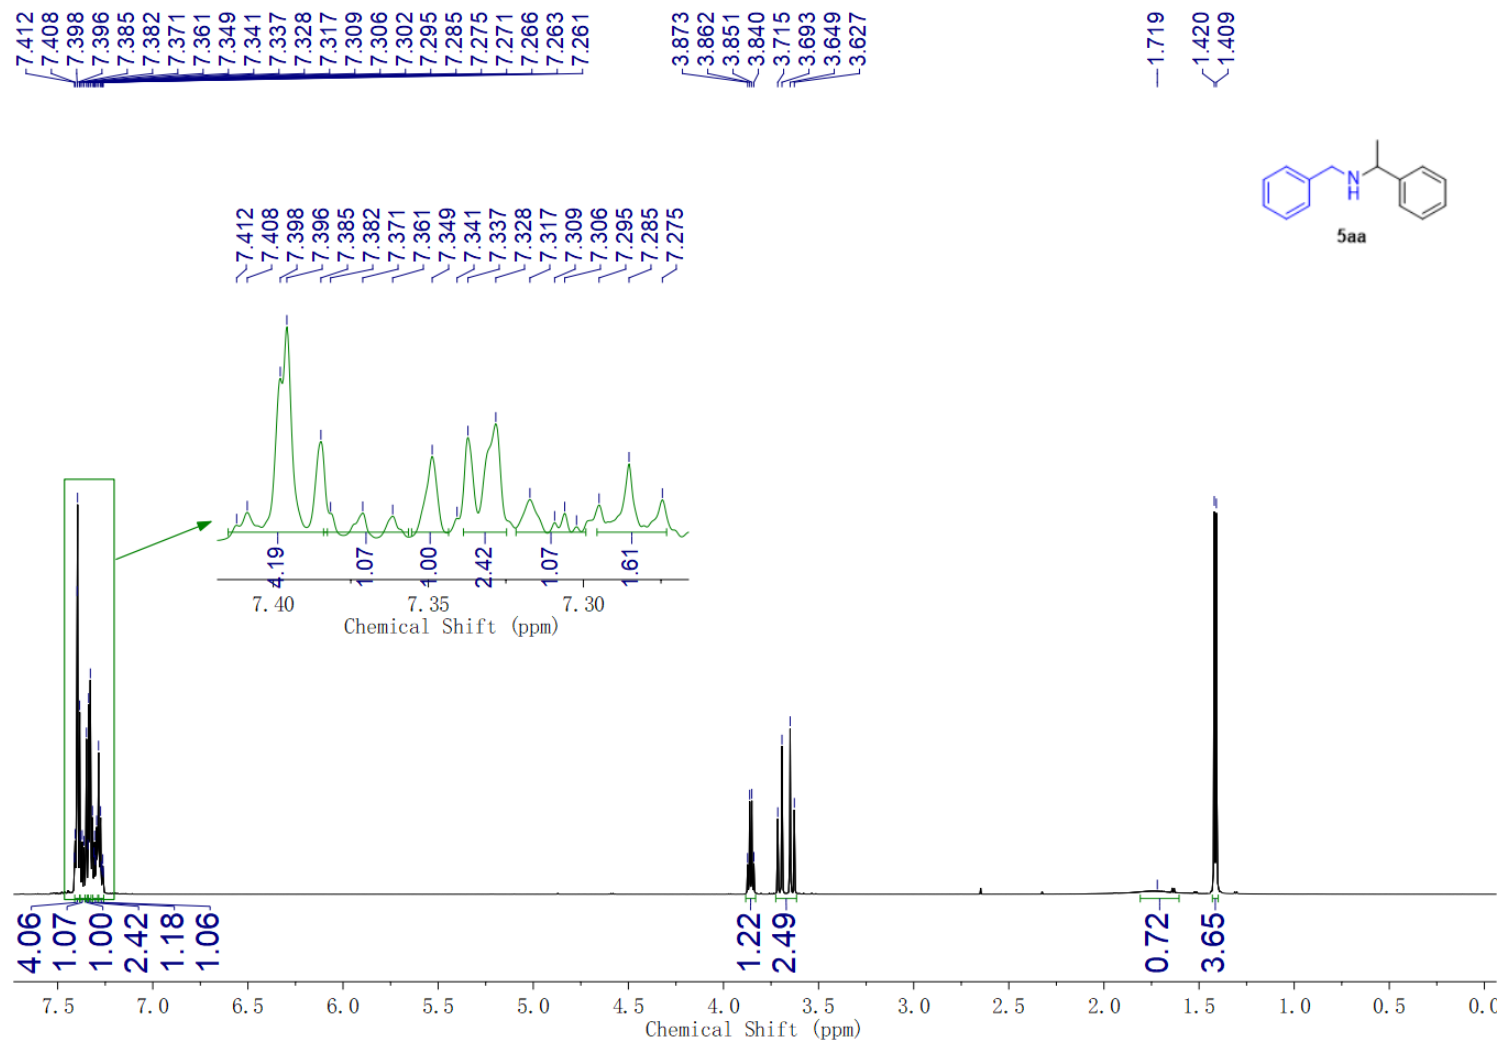

<sup>1</sup>H NMR (600 MHz, 298K, CDCl<sub>3</sub>) of 5aa



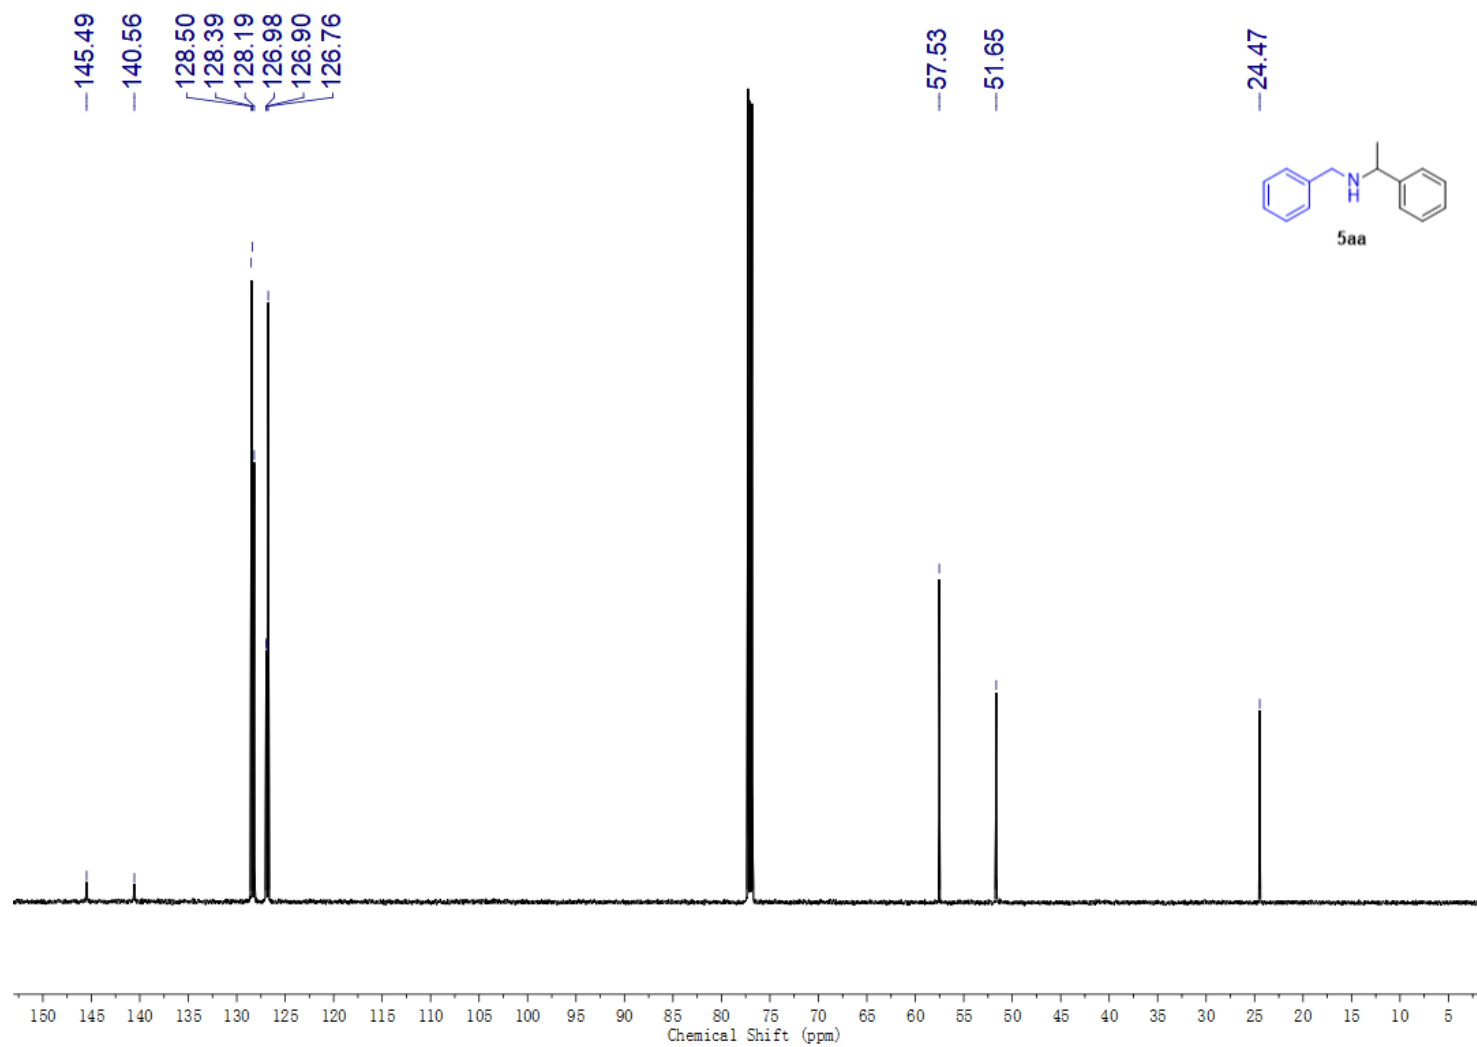

$^{13}\text{C}$  NMR (151 MHz, 298 K,  $\text{CDCl}_3$ ) of **5aa**

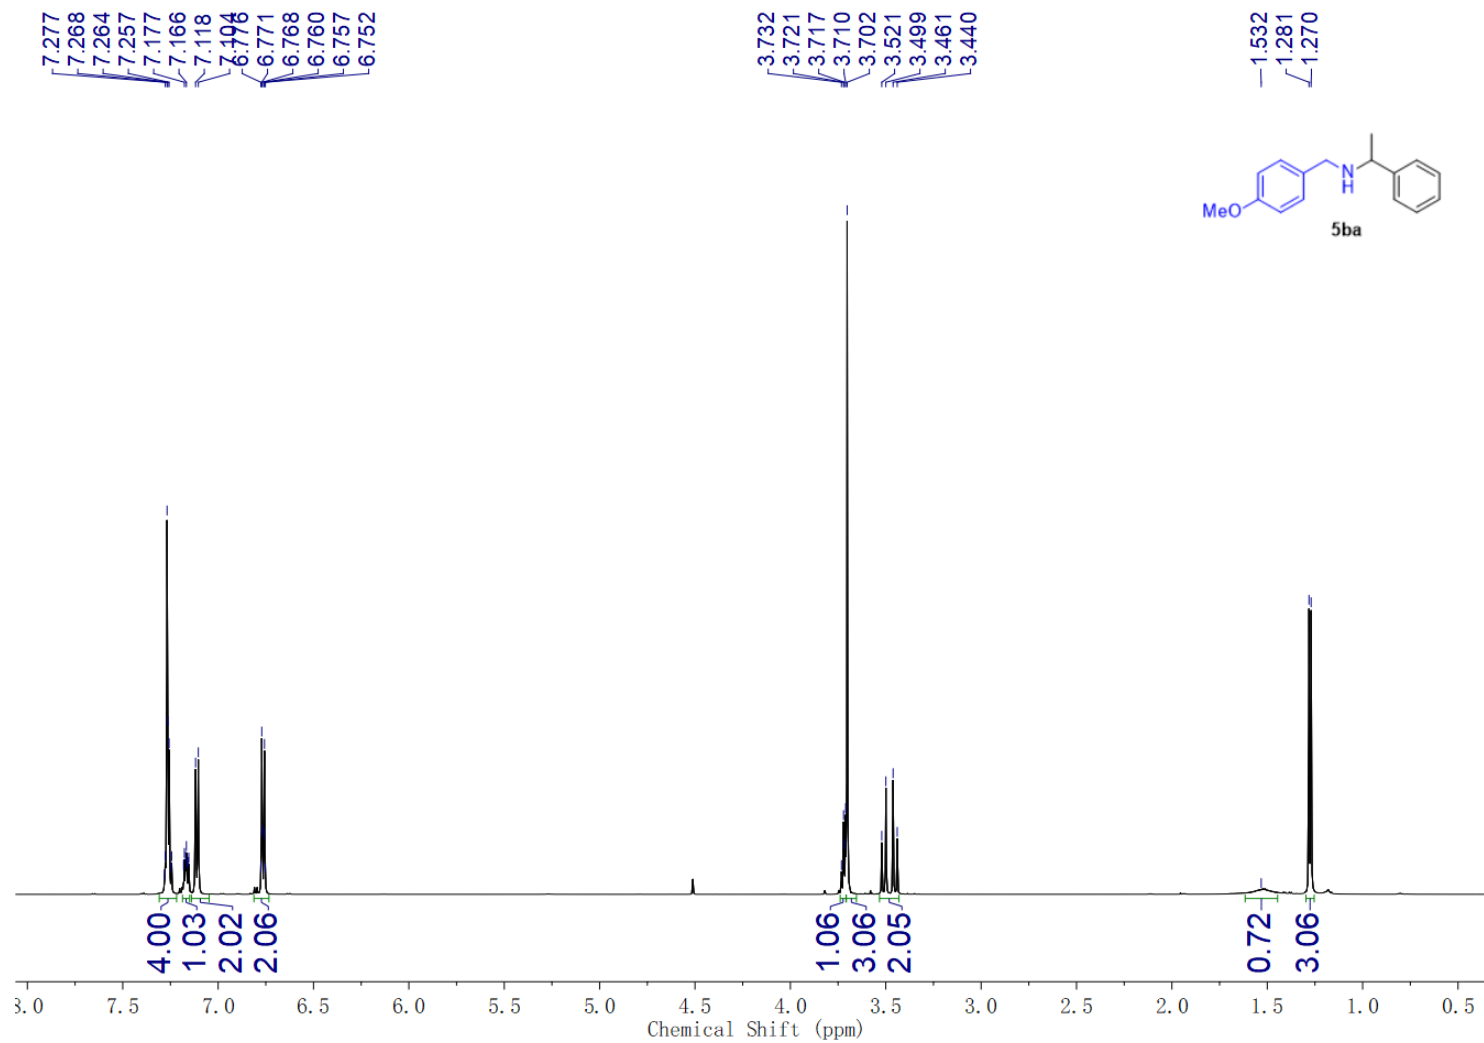

$^1\text{H}$  NMR (600 MHz, 298K,  $\text{CDCl}_3$ ) of 5ba

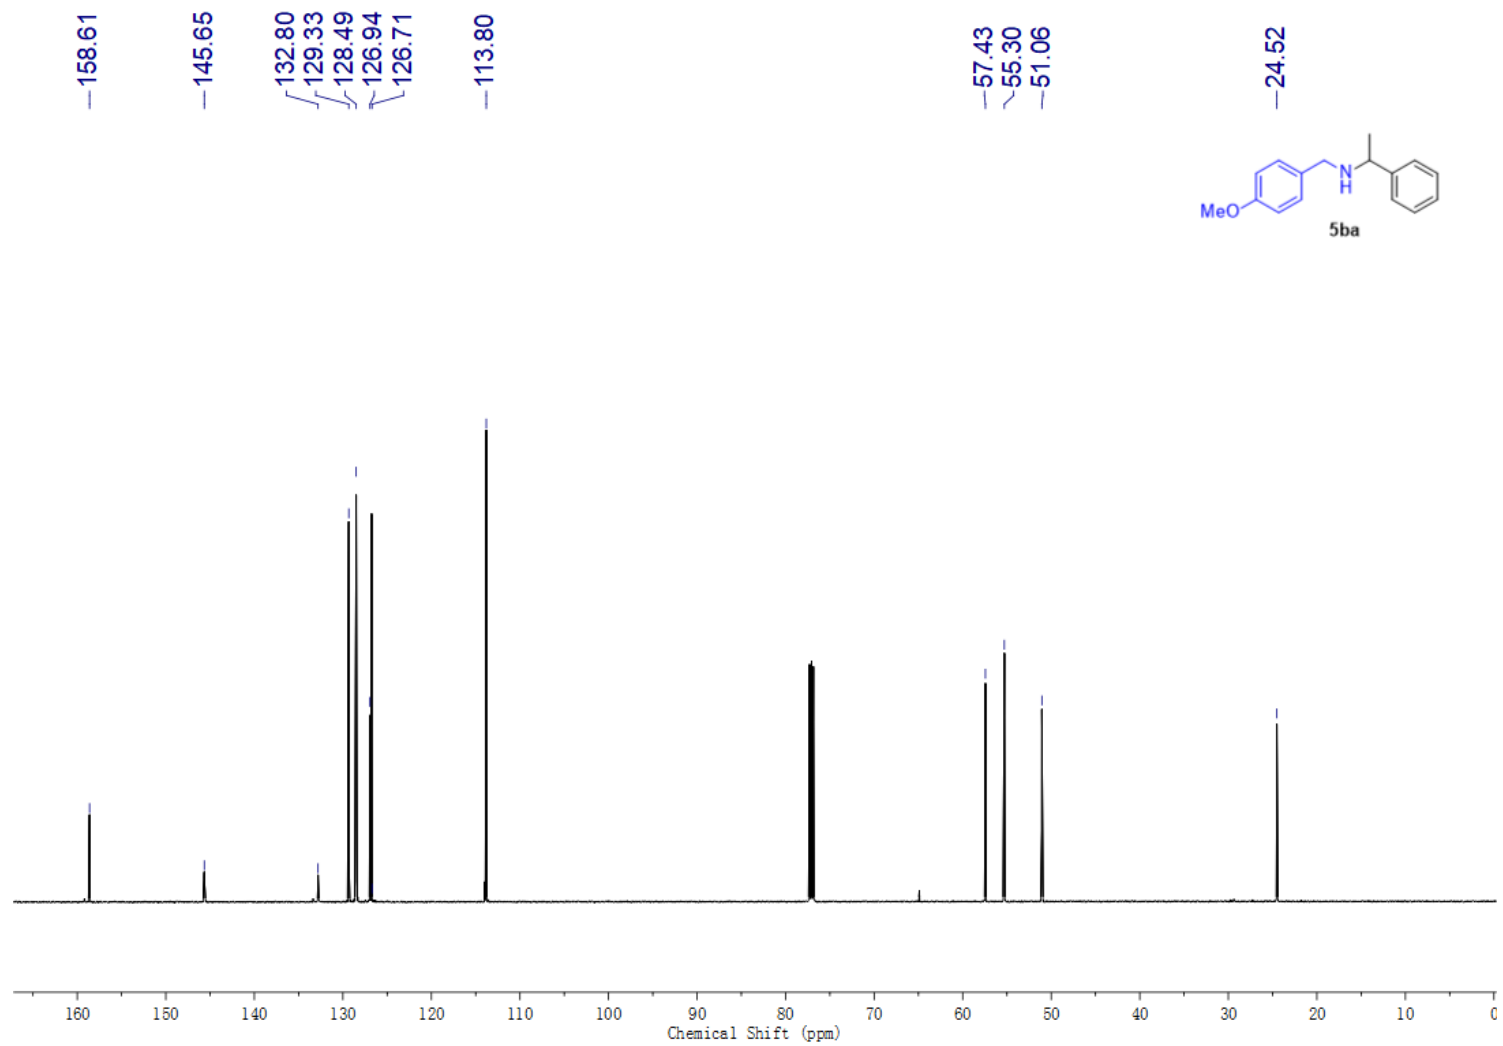

$^{13}\text{C}$  NMR (151 MHz, 298 K,  $\text{CDCl}_3$ ) of **5ba**

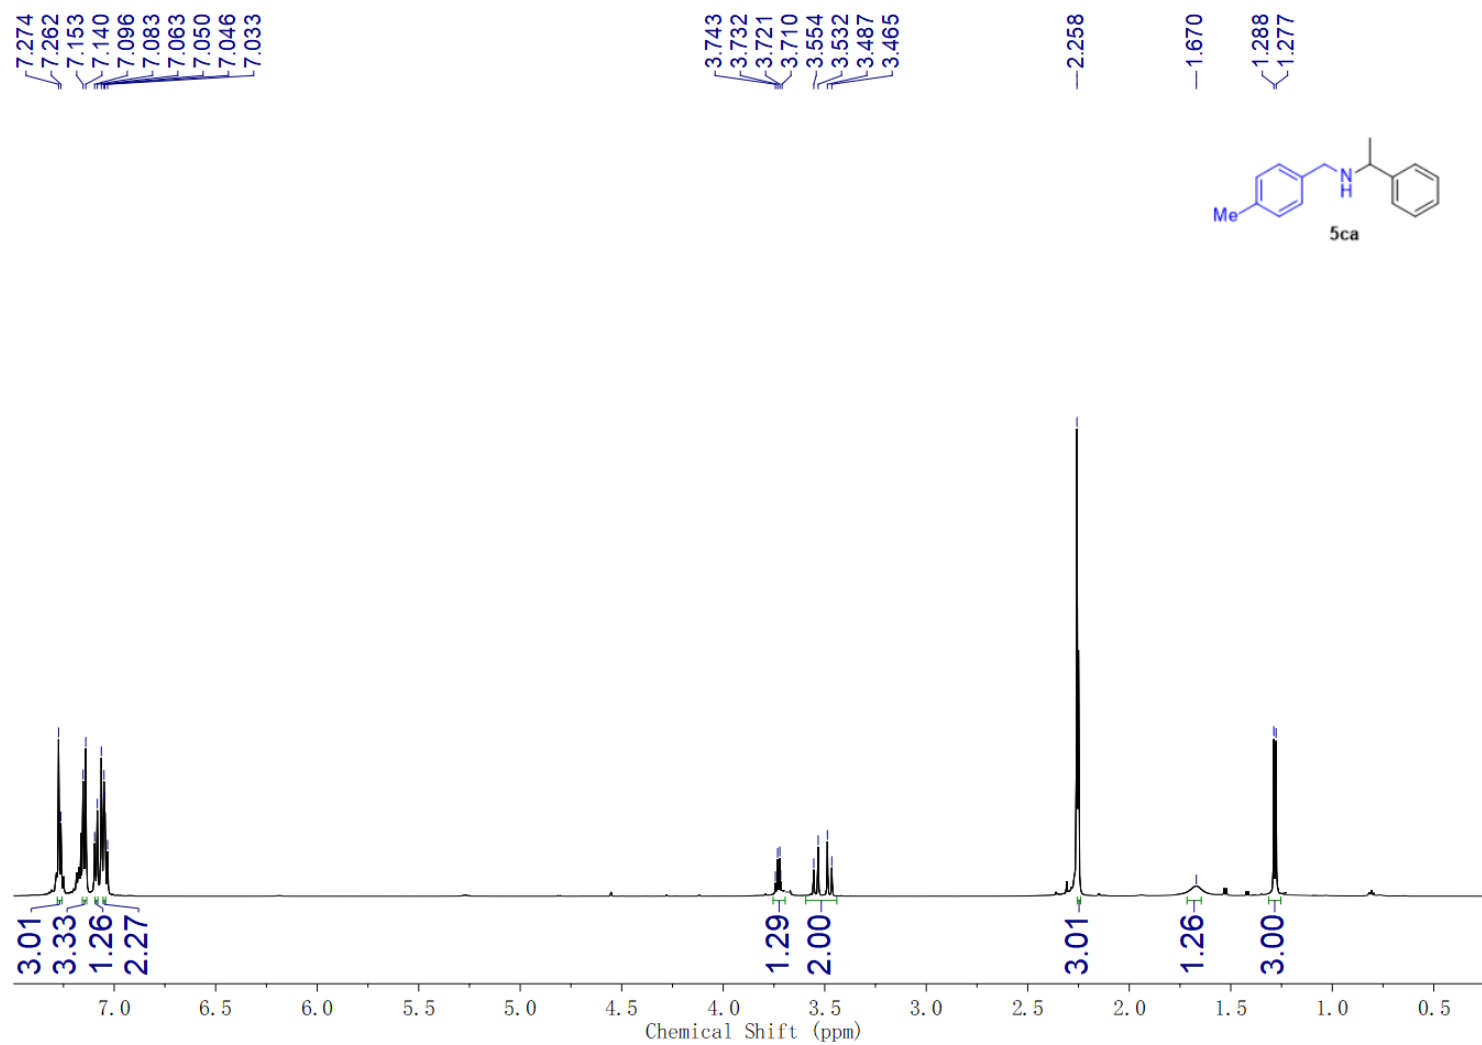

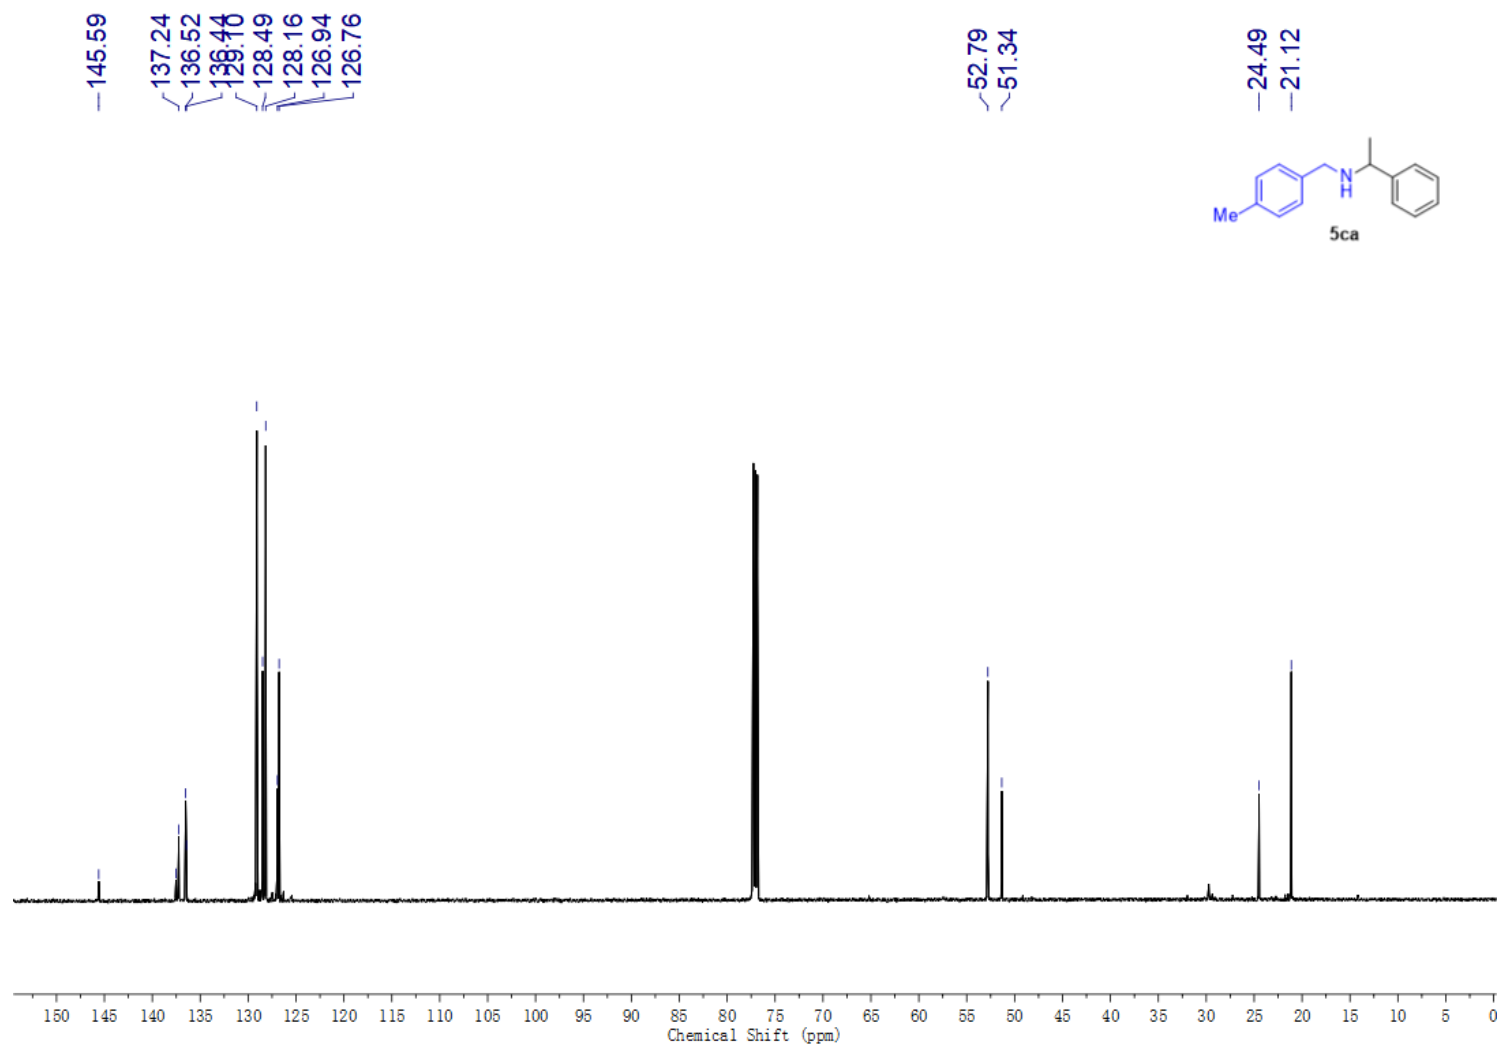

$^{13}\text{C}$  NMR (151 MHz, 298 K,  $\text{CDCl}_3$ ) of **5ca**

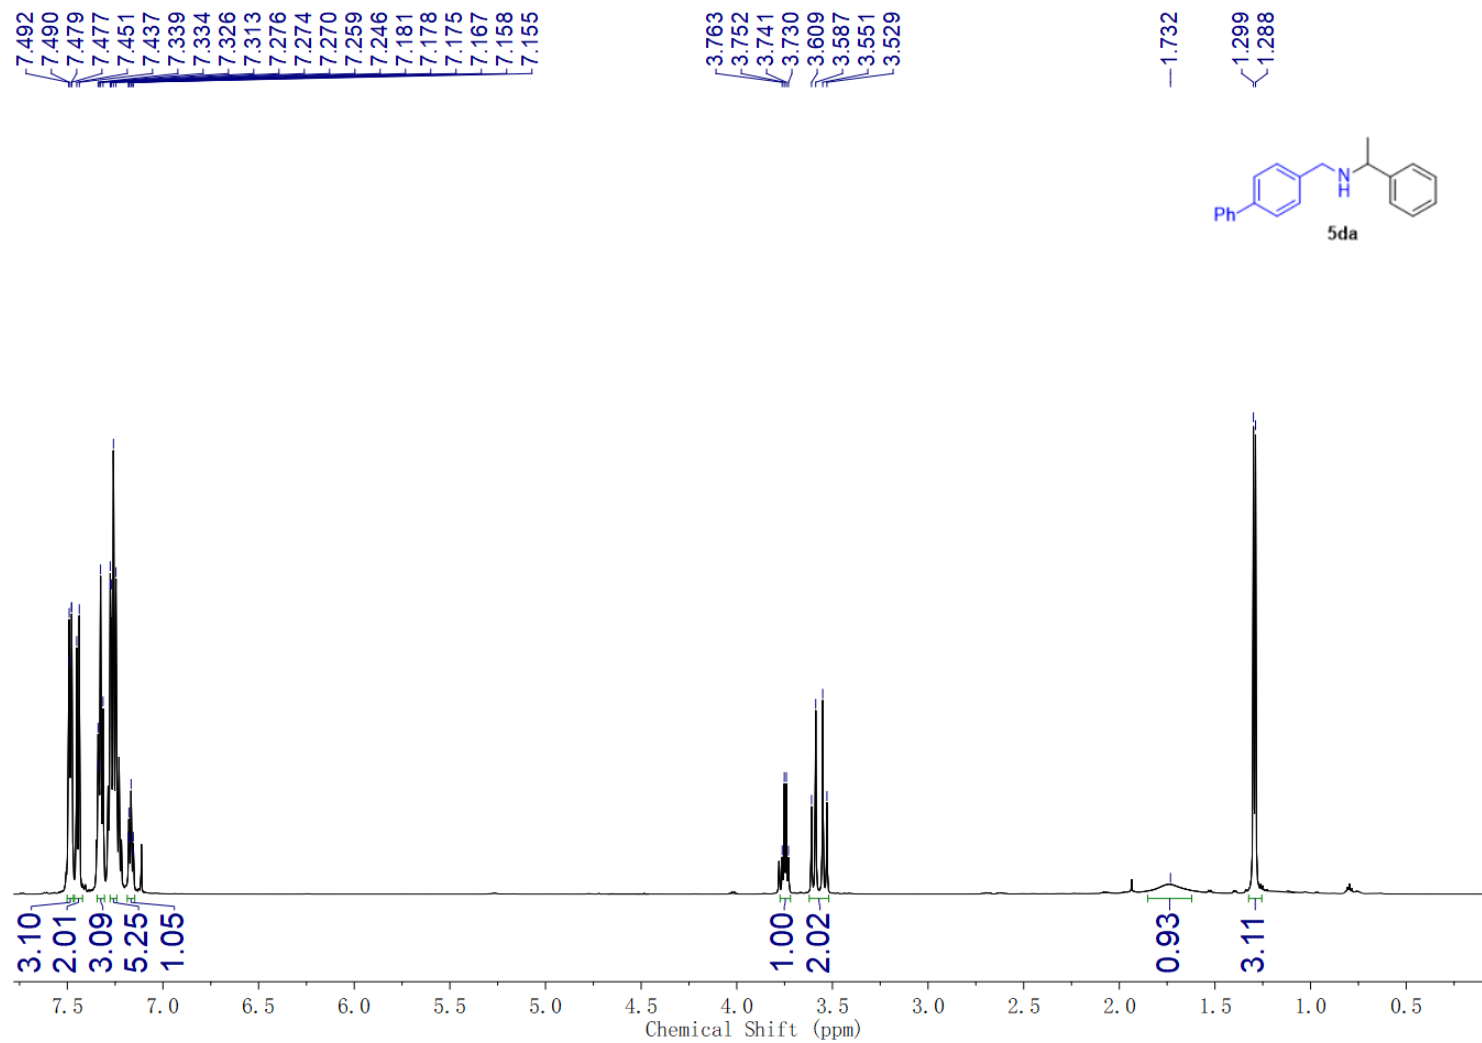

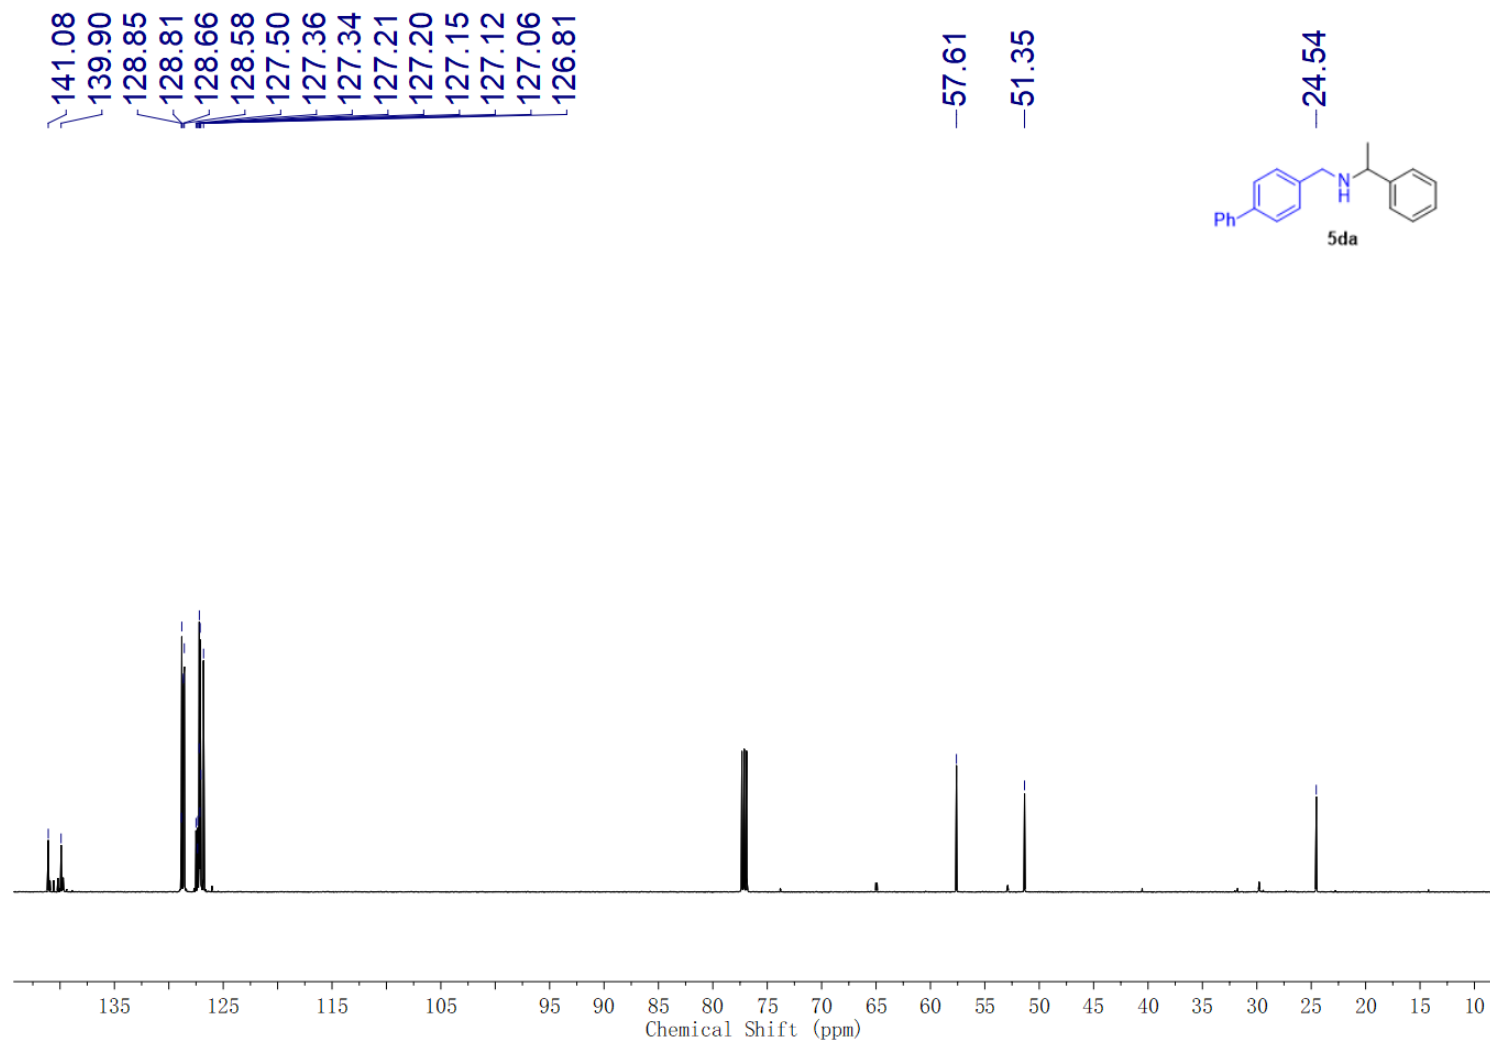

$^{13}\text{C}$  NMR (151 MHz, 298 K,  $\text{CDCl}_3$ ) of **5da**

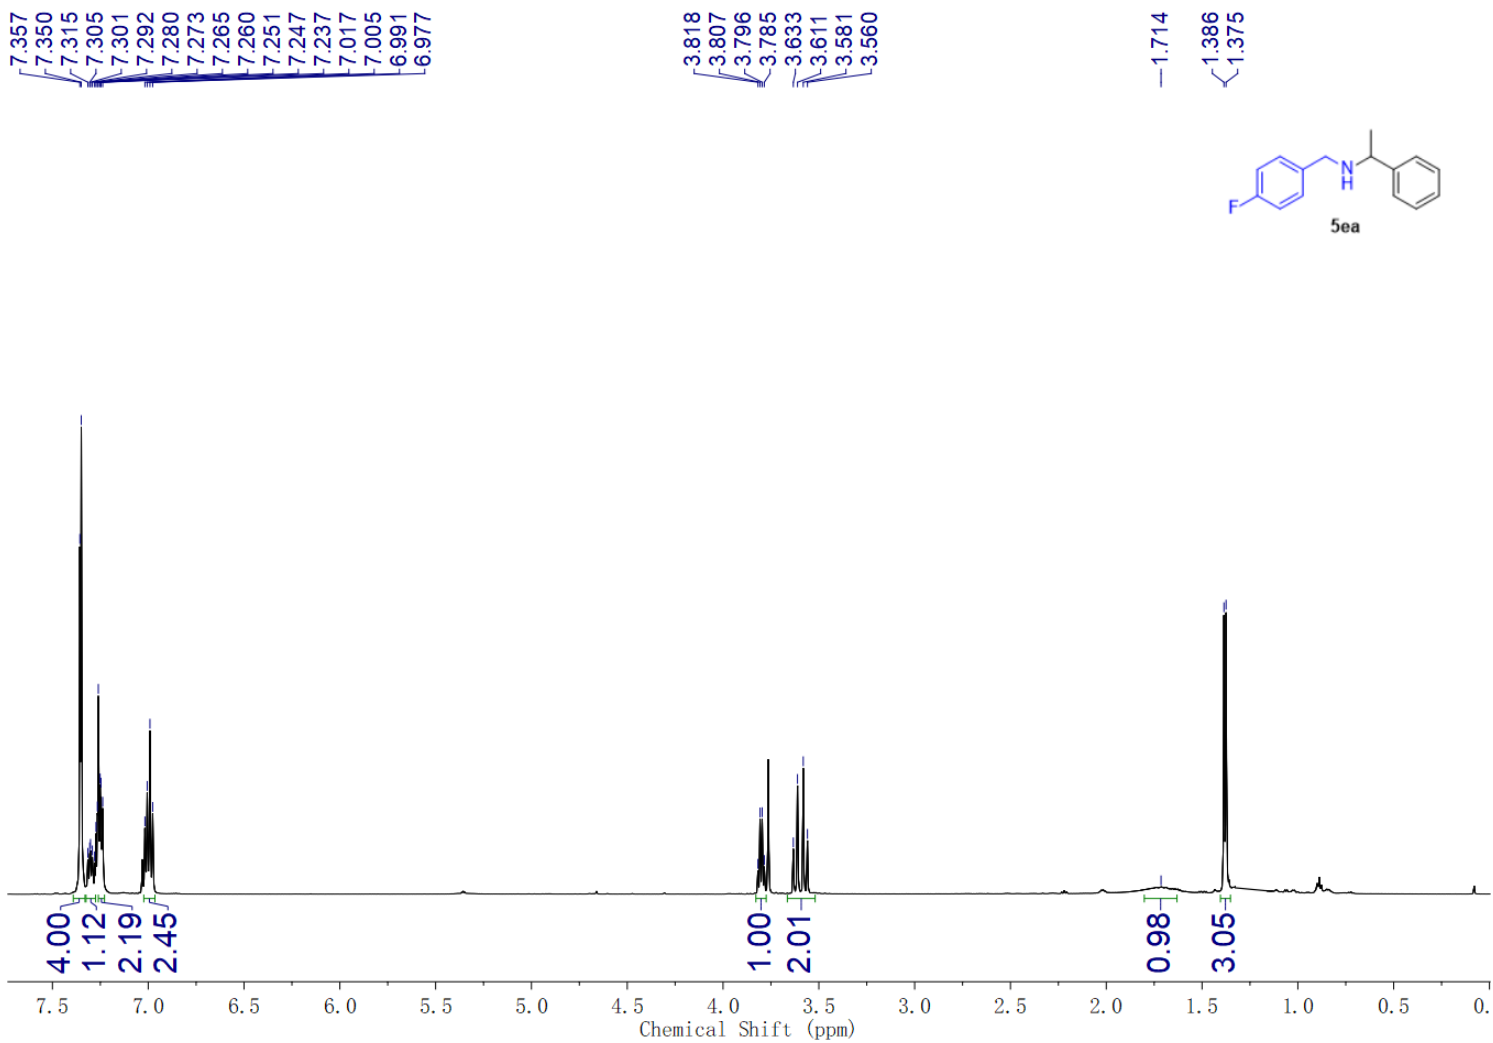



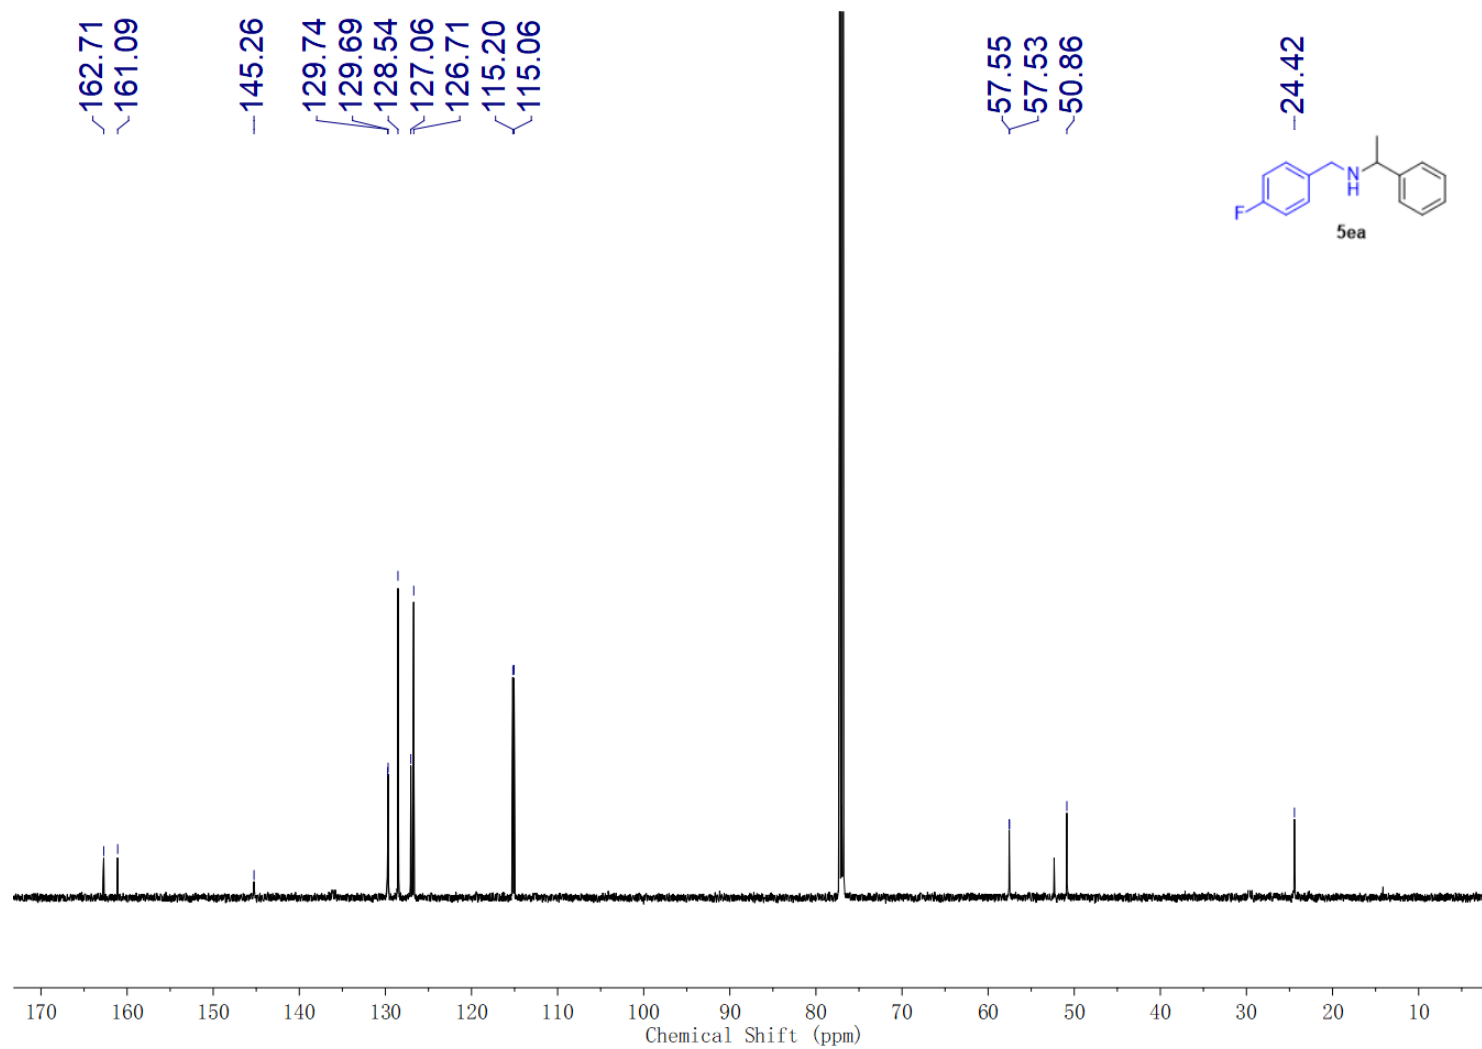

$^{13}\text{C}$  NMR (151 MHz, 298 K,  $\text{CDCl}_3$ ) of **5ea**

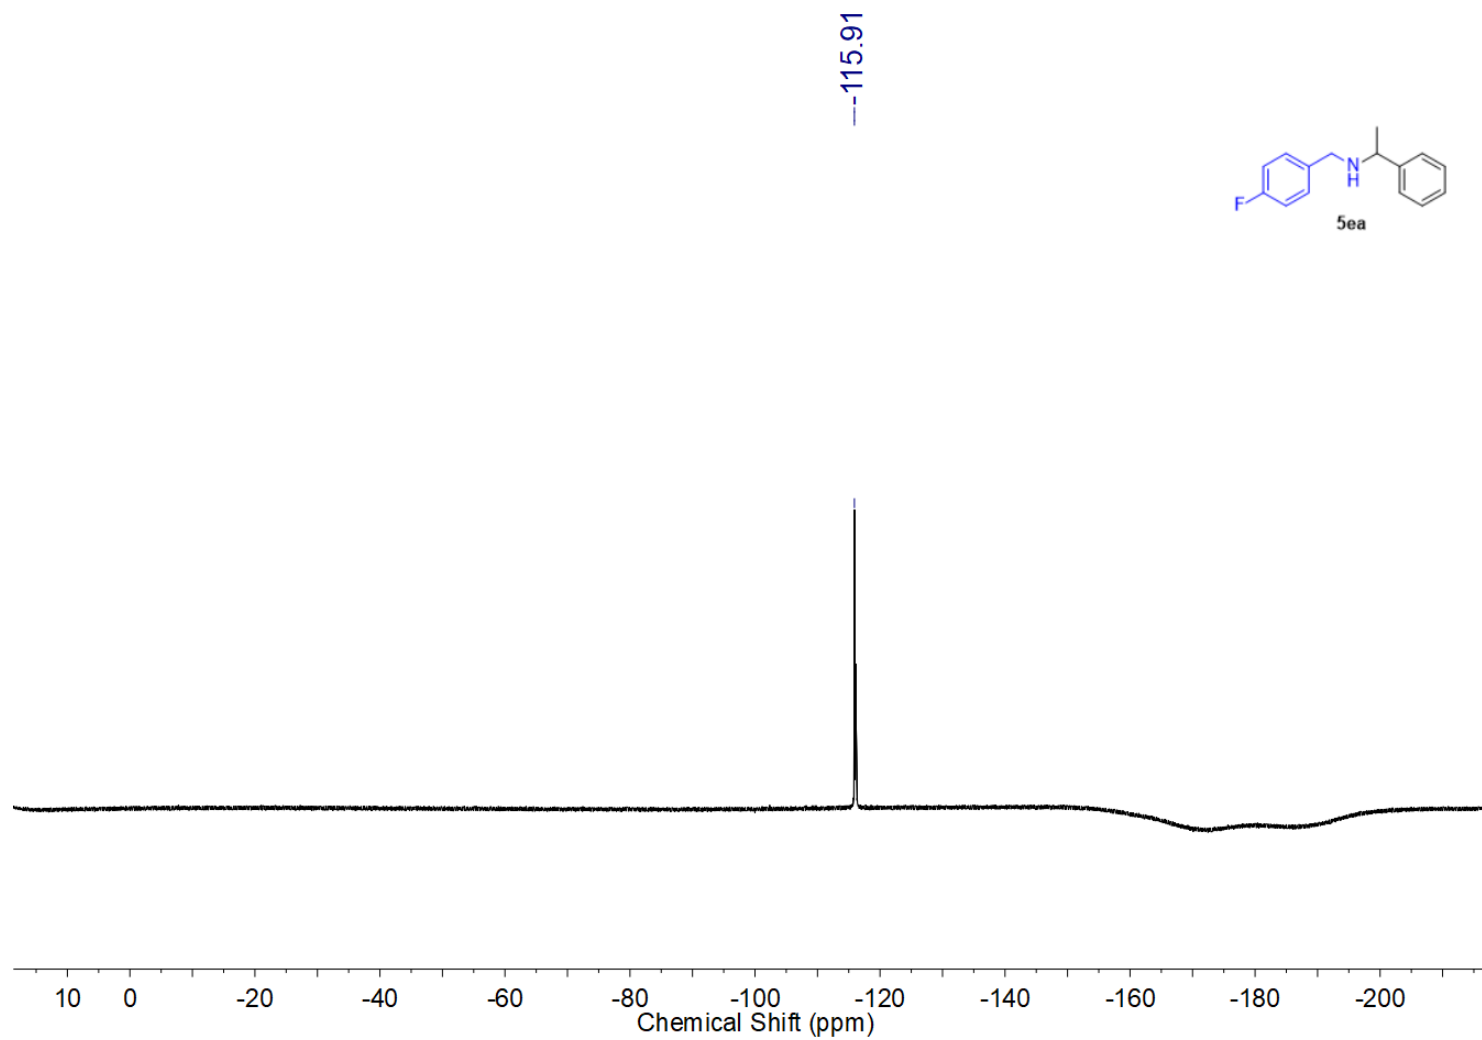

$^{19}\text{F}$  NMR (564 MHz, 298 K,  $\text{CDCl}_3$ ) of **5ea**

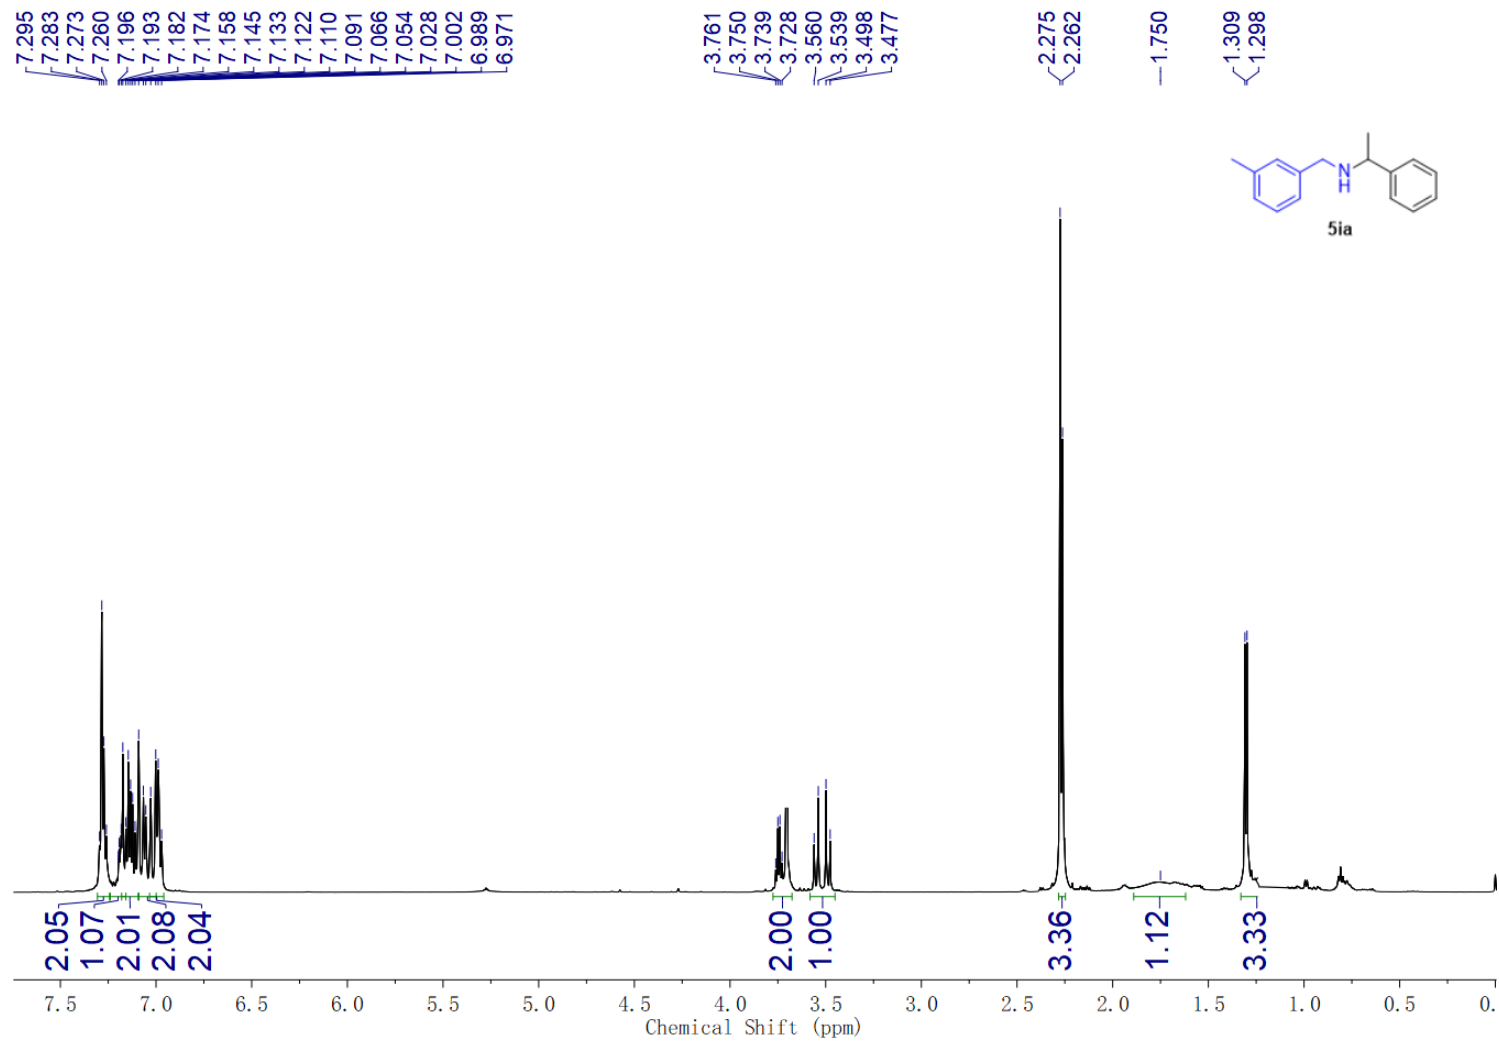

$^1\text{H}$  NMR (600 MHz, 298K,  $\text{CDCl}_3$ ) of 5ia

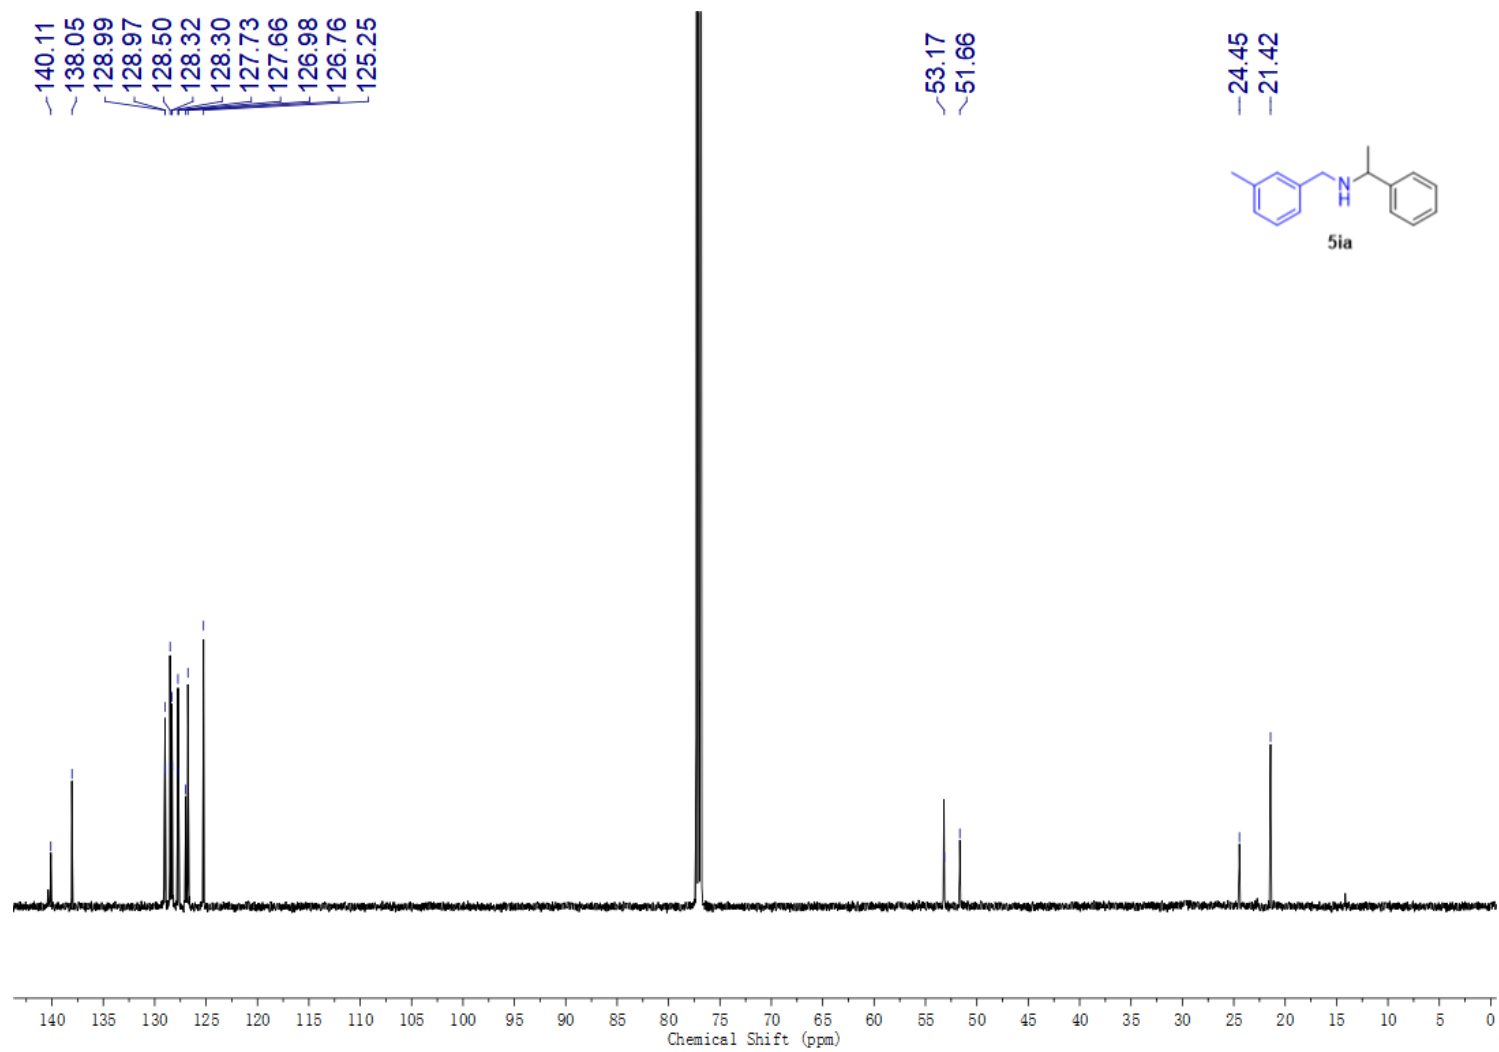

$^{13}\text{C}$  NMR (151 MHz, 298 K,  $\text{CDCl}_3$ ) of **5ia**

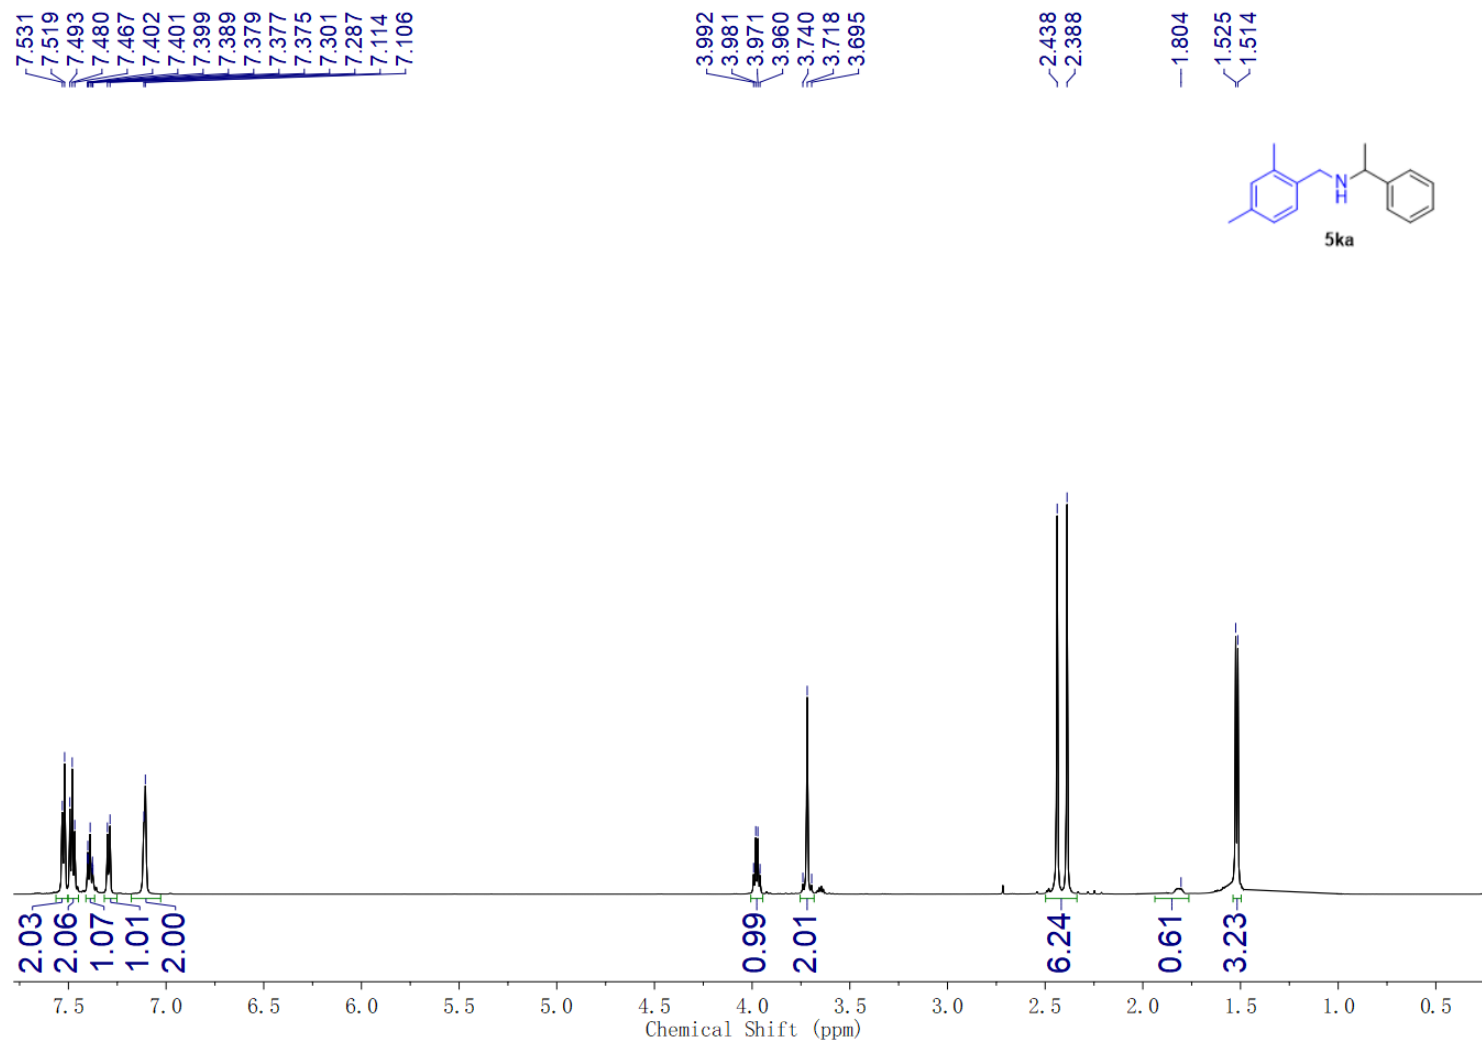

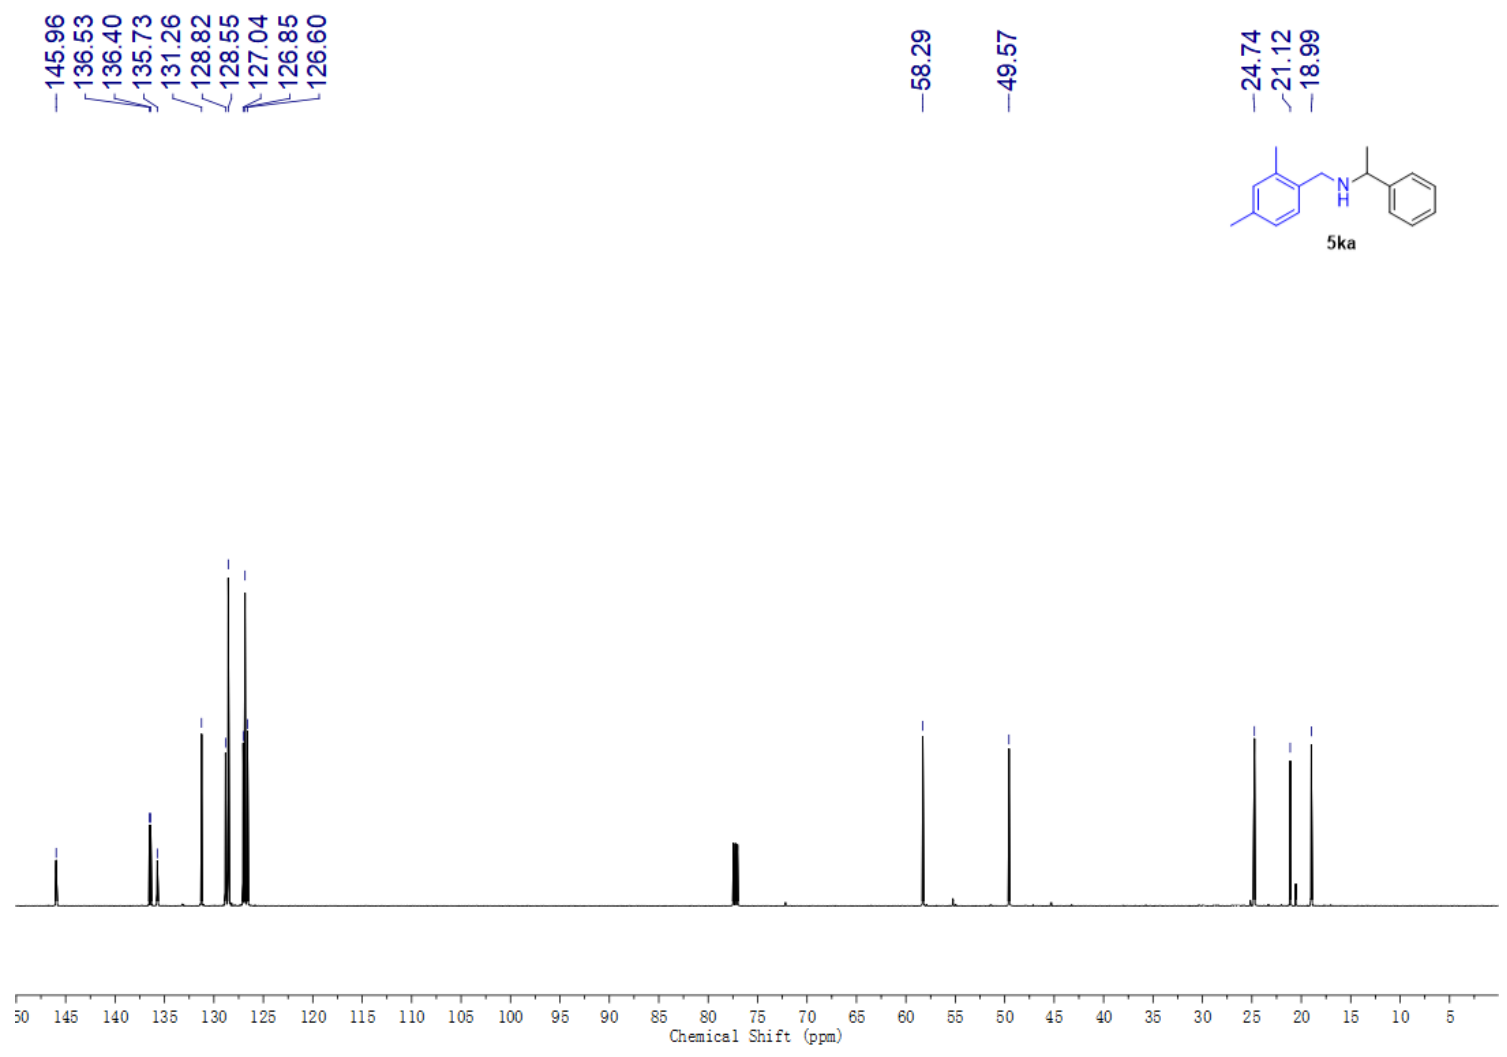

<sup>13</sup>C NMR (151 MHz, 298 K, CDCl<sub>3</sub>) of 5ka

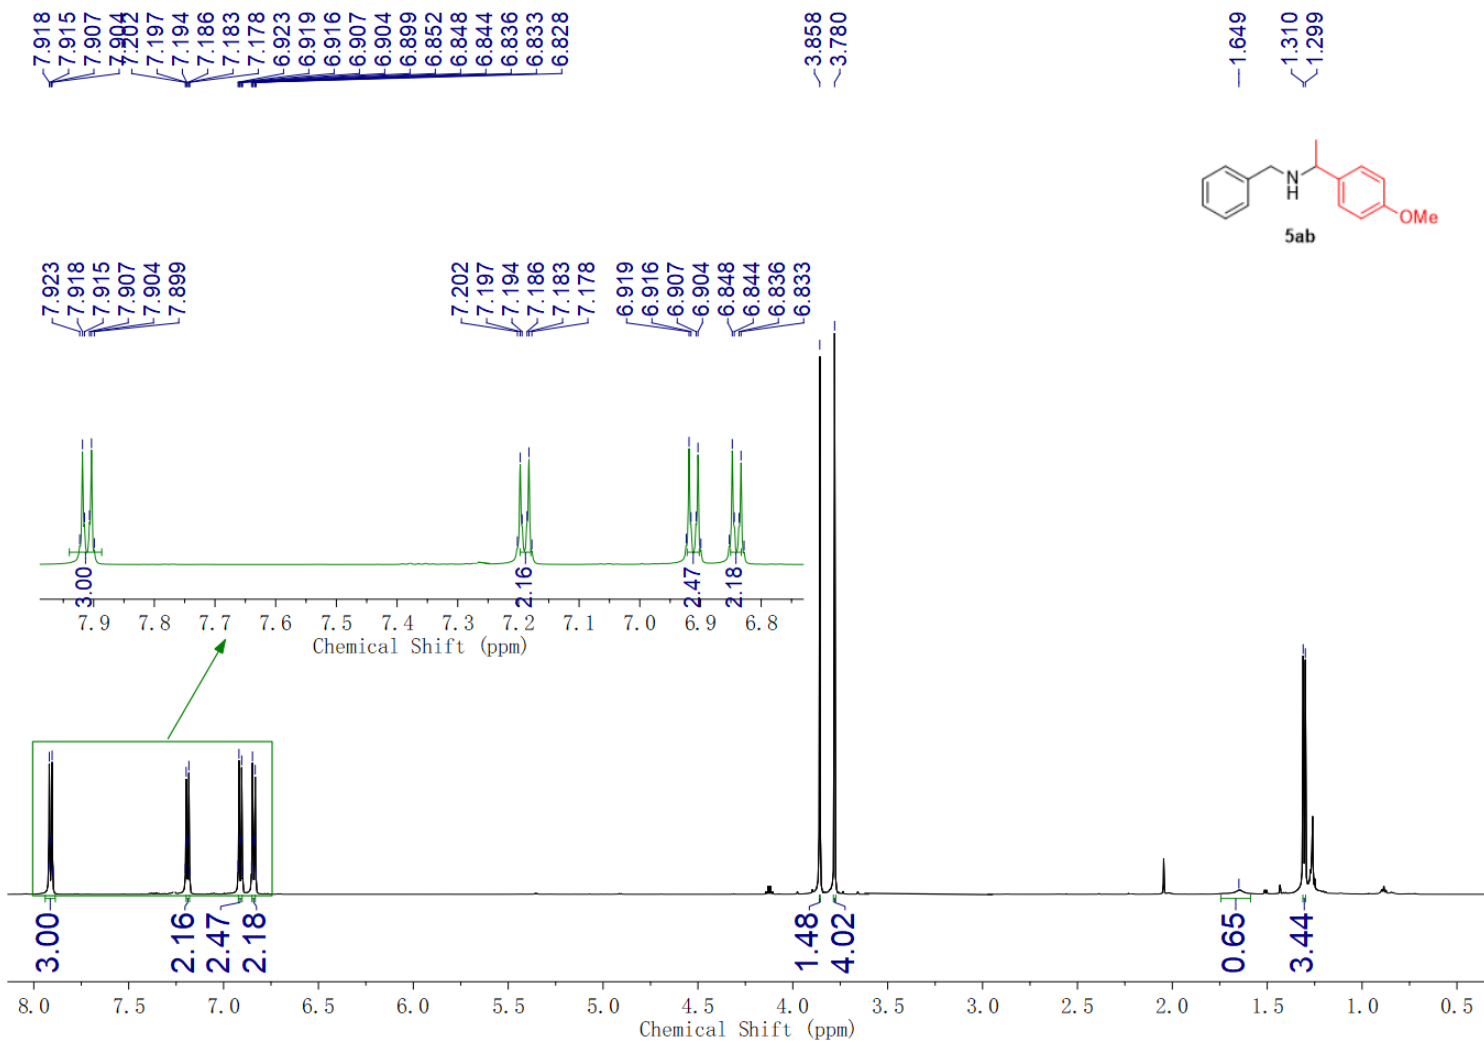

**<sup>1</sup>H NMR (600 MHz, 298K, CDCl<sub>3</sub>) of 5ab**

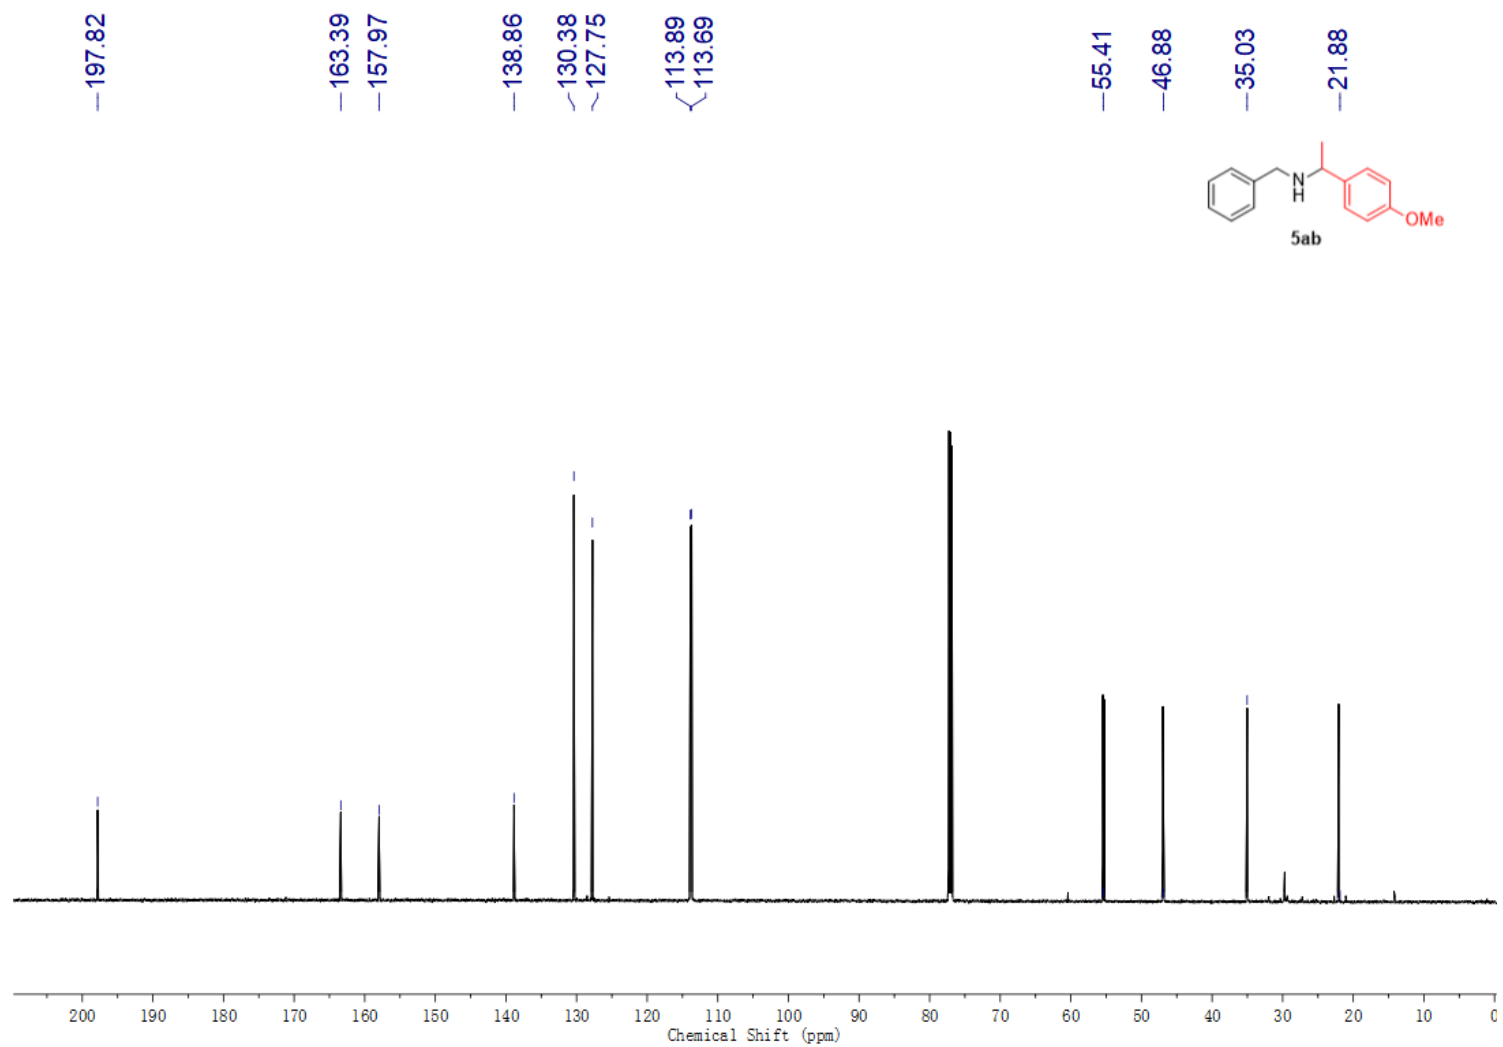

$^{13}\text{C}$  NMR (151 MHz, 298 K,  $\text{CDCl}_3$ ) of **5ab**
